# Supplementary material for: Organelle proteomic profiling reveals lysosomal heterogeneity in association with longevity
Source: eLife journal article supplement (doi:10.7554/elife.85214), 2024-01-19
Supplement: figures [file elife-85214-figures-v2.pdf]

---

## Figures and figure supplements

Organelle proteomic profiling reveals lysosomal heterogeneity in association with longevity

**Yong Yu *et al.***

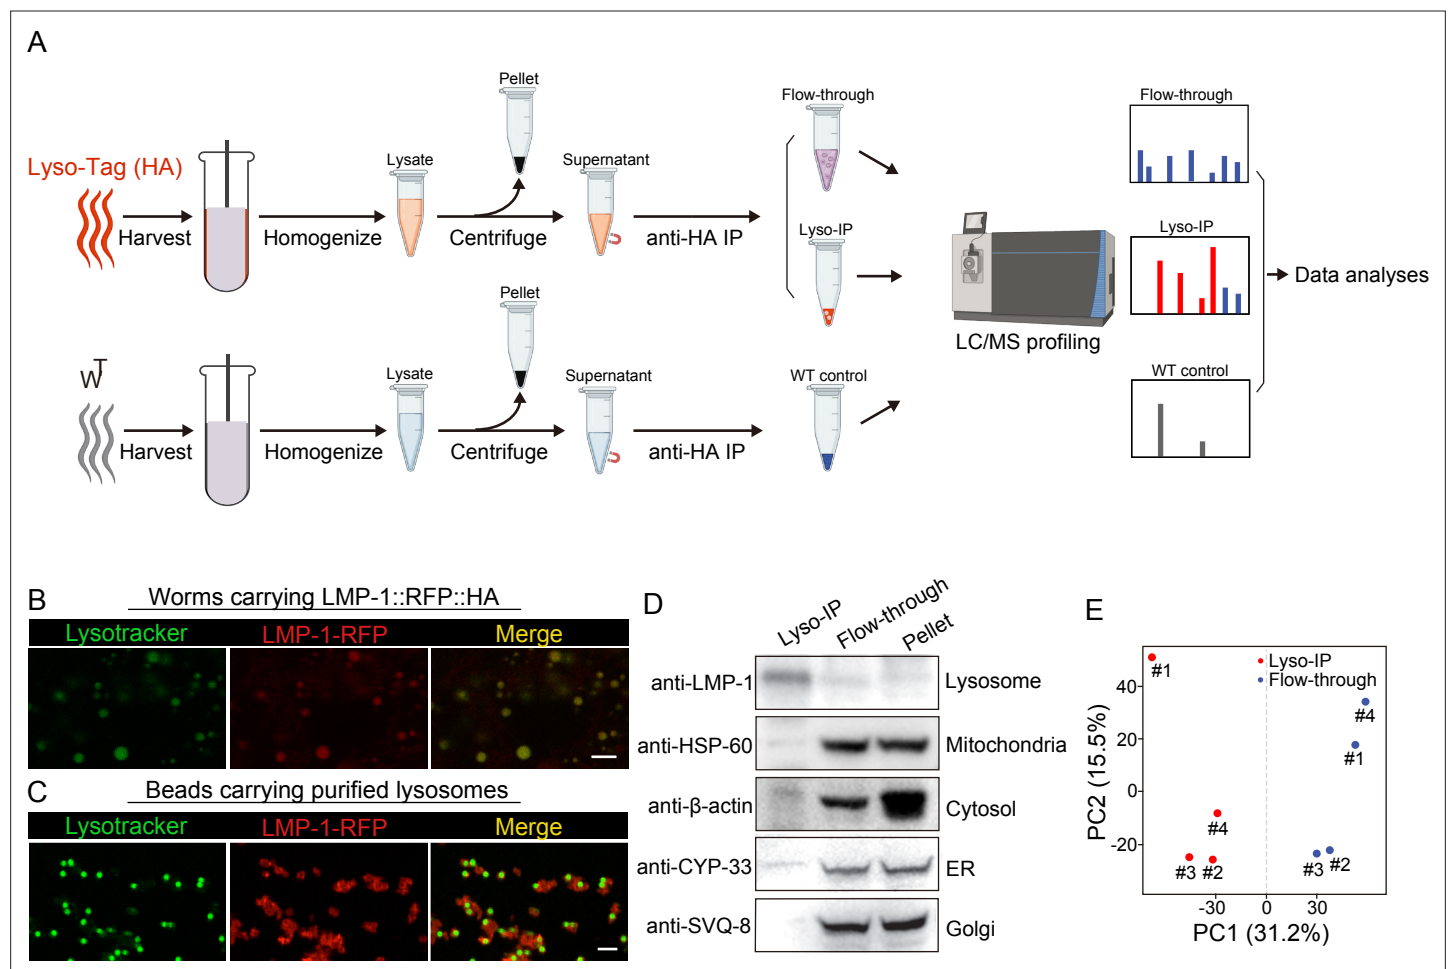

**Figure 1.** Rapid lysosome isolation coupled with proteomic profiling. **(A)** Schematic of the workflow for immunoprecipitation-based lysosome purification (Lyso-IP) and mass-spectrometry based proteomic profiling to identify lysosome-enriched proteomes in *C. elegans*. **(B)** Example images of transgenic strains carrying LMP-1 Lyso-Tag (LMP-1::RFP-3×HA) with LysoTracker staining to mark lysosomes in vivo. Scale bar = 5 μm. **(C)** Example images of beads carrying purified lysosomes from Lyso-IP with LysoTracker staining to mark intact lysosomes in vitro. Scale bar = 5 μm. **(D)** Western blot for protein markers of different subcellular compartments using purified lysosomes (Lyso-IP), paired non-lysosomal fractions (Flow-through) or Pellet. **(E)** PCA analysis of four independent biological replicates of Lyso-IP and Flow-through samples.

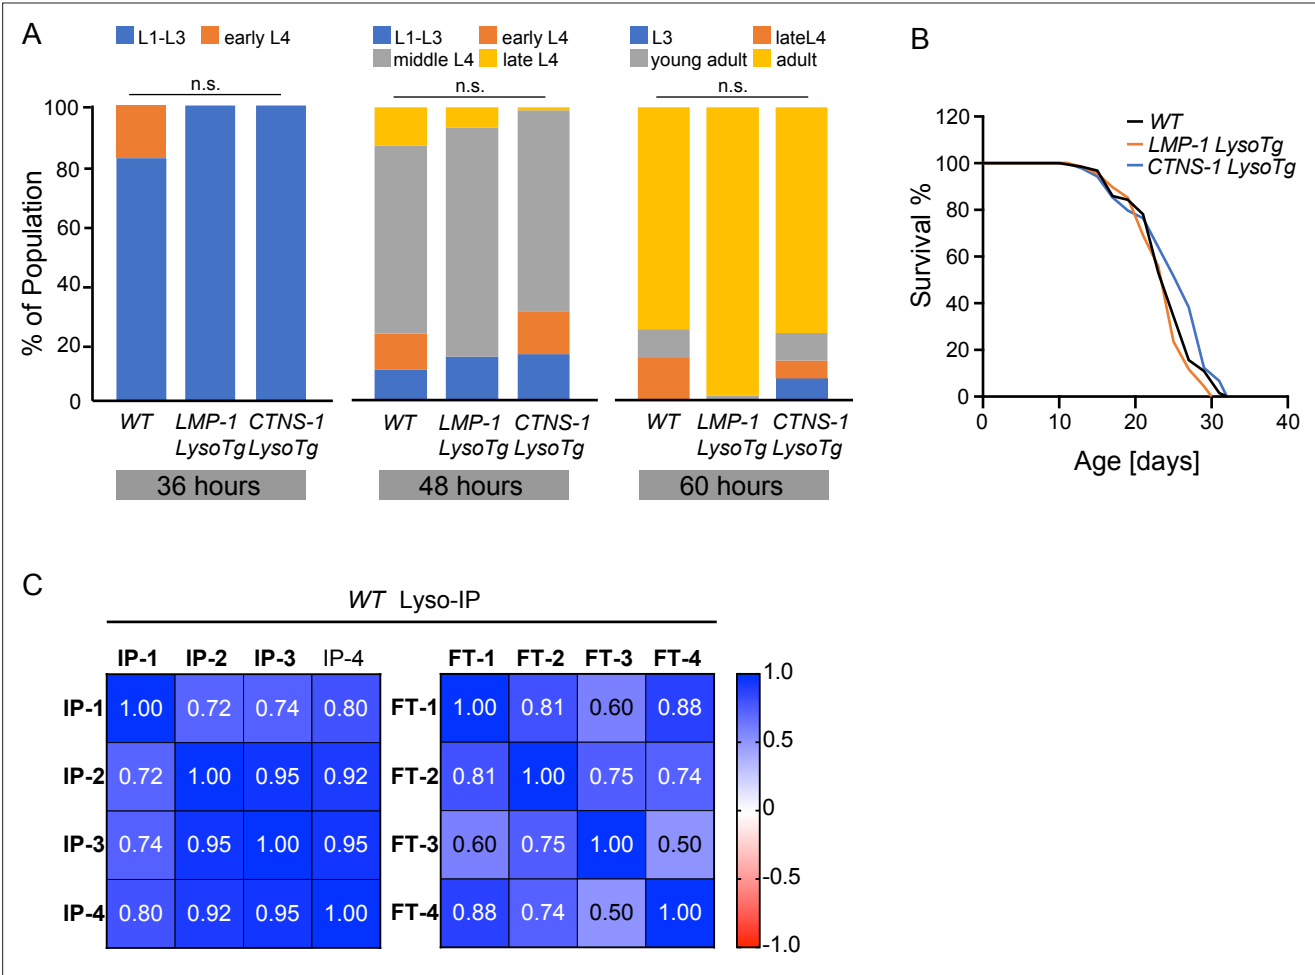

**Figure 1—figure supplement 1.** Analysis of *LysoTg* lines and Lyso-IP profiling in wild-type worms. **(A)** Developmental timing of WT and transgenic strains expressing LMP-1 and CTNS-1 Lyso-Tag (LMP-1 and CTNS-1 *LysoTg*). n.s.  $P>0.05$  by Chi-squared test. **(B)** Lifespan of WT, LMP-1 *LysoTg*, and CTNS-1 *LysoTg* worms. The lifespan data are also in **Supplementary file 8**. **(C)** Correlation analysis of four independent biological replicates of Lyso-IP (IP) and Flow-through (FT) samples from proteomics analyses. (Nakae et al., 2010)

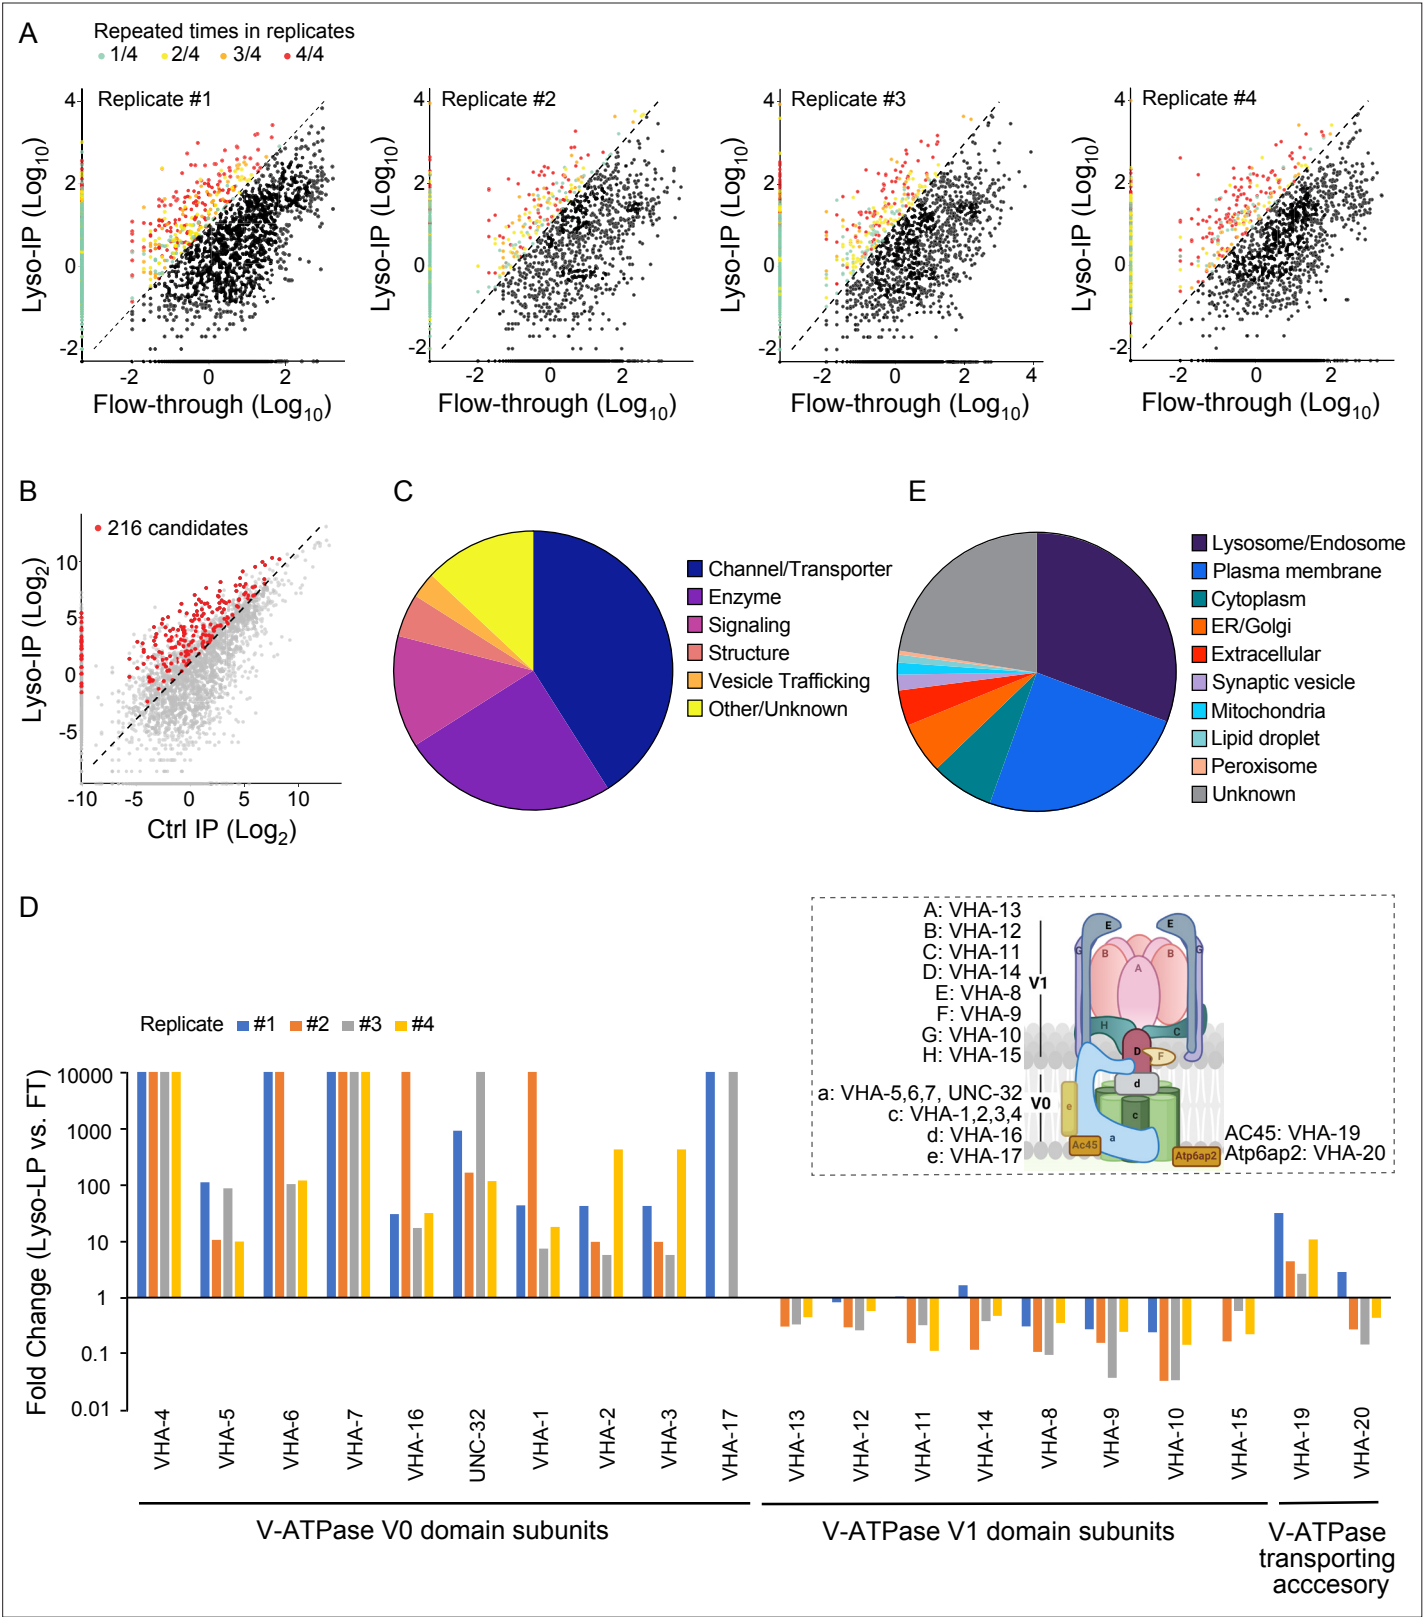

**Figure 2.** Systematic view of lysosome-enriched proteome. **(A)** Scatter plots showing candidate selection from four independent biological replicates in proteomics analyses. Proteins with at least 10-fold higher levels in Lyso-IP samples than in flow-through (FT) controls are highlighted with different colors based on repeated times in four replicates. **(B)** Scatter plot showing candidate selection with normalization to non-tagged controls using wild-type worms. 216 proteins with over 2-fold higher levels in Lyso-IP samples than in non-tagged controls are highlighted in red. **(C)** Pie chart showing molecular

Figure 2 continued on next page



*Figure 2 continued*

function categories of lysosome-enriched proteins. **(D)** The lysosomal enrichment ratio (Lyso-IP vs FT) for each subunit of lysosomal vacuolar ATPase (v-ATPase) in four independent replicates is shown. Inserted scheme showing lysosomal V-ATPase assembly. **(E)** Pie chart showing subcellular location categories of lysosome-enriched proteins.

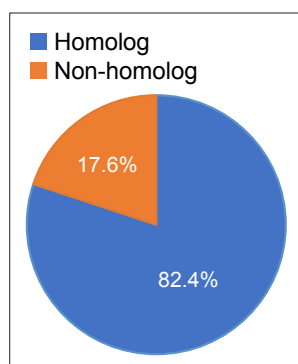

**Figure 2—figure supplement 1.** Pie chart showing the proportion of LMP-1 Lyso-IP candidates from WT worms with mammalian homologs.

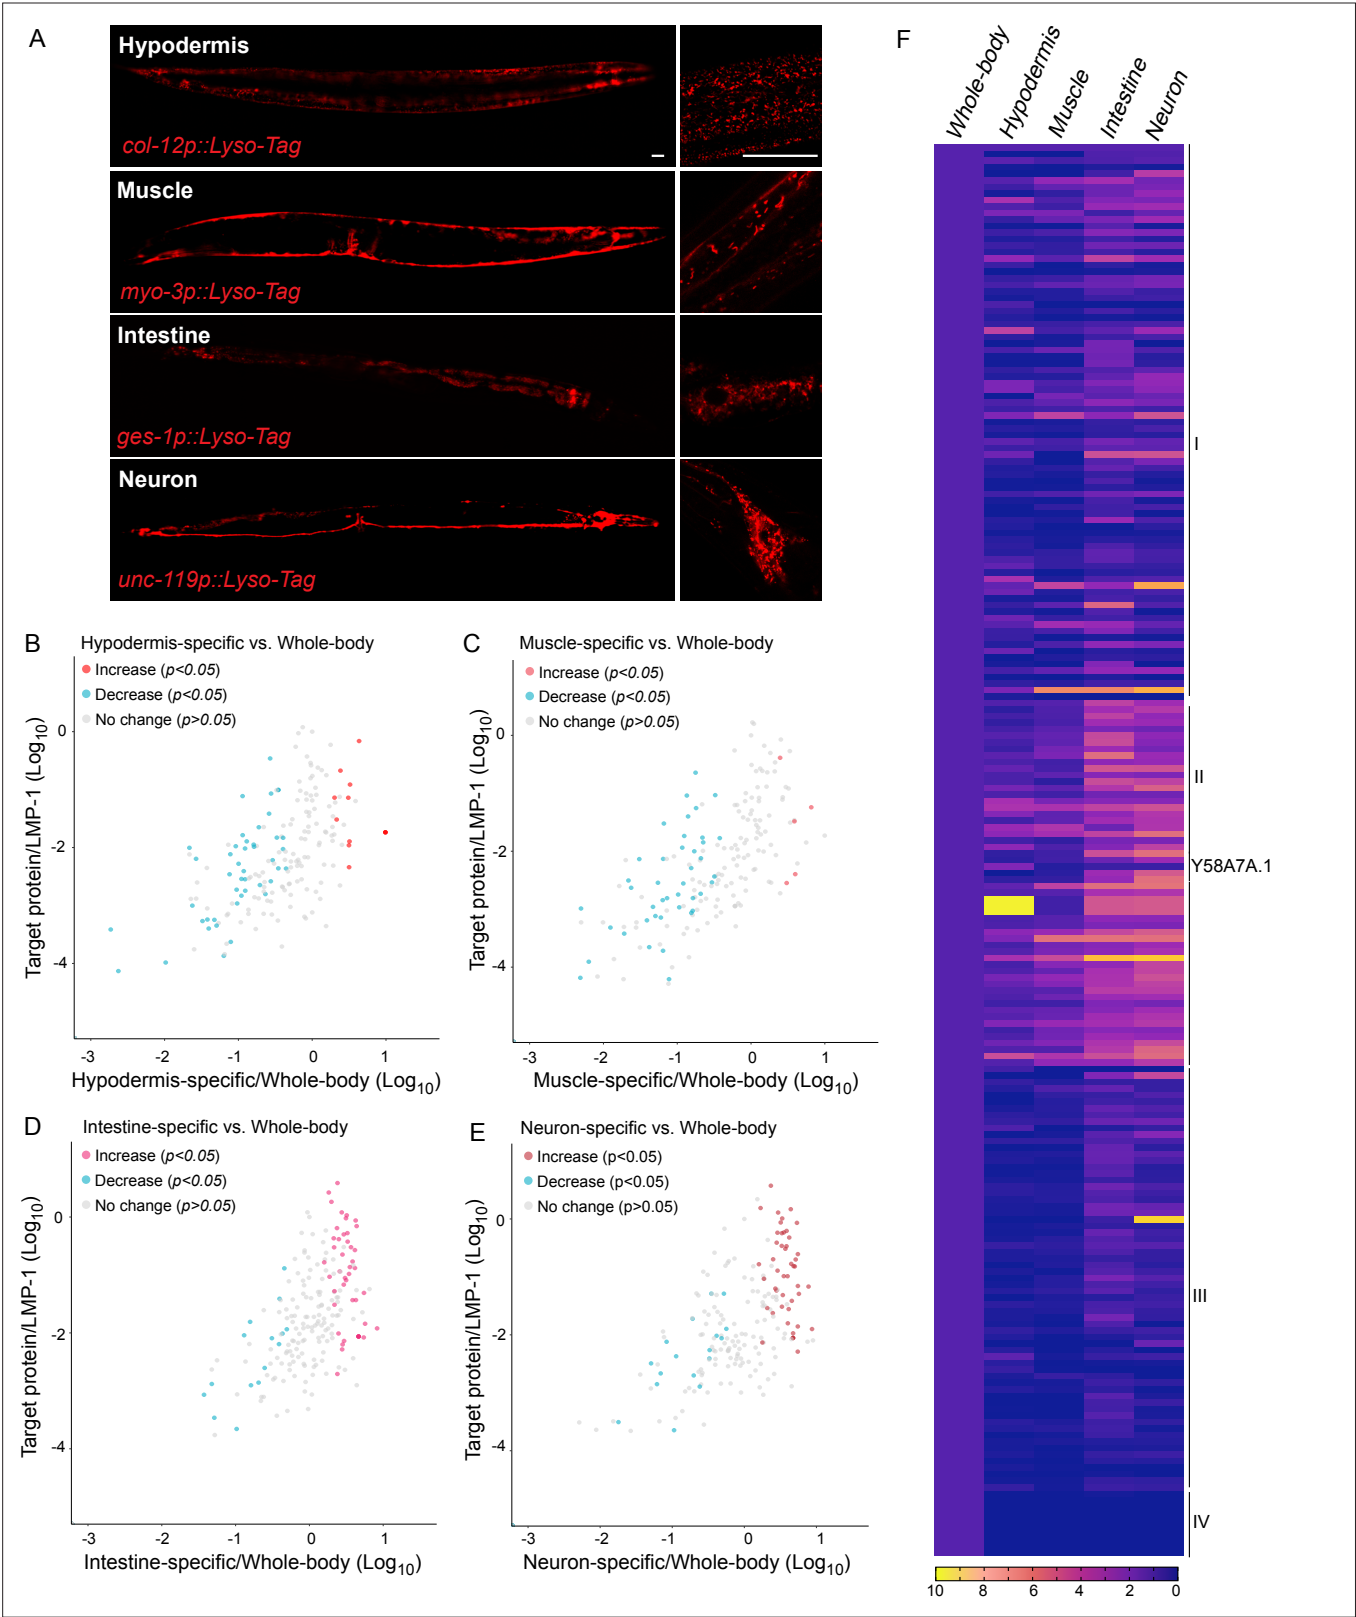

**Figure 3.** Lysosomal proteome heterogeneity across tissues. **(A)** Example images of transgenic strains carrying Lyso-Tag (LMP-1::RFP-3×HA) driven by four different tissue-specific promoters. Scale bar = 20 μm. **(B–E)** Scatter plot showing the relative enrichment ratio for each of 216 lysosome-enriched proteins identified from whole-body LMP-1 Lyso-IP in comparison with tissue-specific LMP-1 Lyso-IPs, hypodermis **(B)**, muscle **(C)**, intestine **(D)** and neuron **(E)**. X axis, enrichment ratio tissue-specific vs. whole-body; Y axis, normalized protein abundance over LMP-1; each dot represents the average

Figure 3 continued on next page

*Figure 3 continued*

of three replicates. **(F)** Heatmap showing the relative enrichment of 216 lysosome-enriched proteins identified from whole-body LMP-1 Lyso-IP in comparison with tissue-specific LMP-1 Lyso-IPs. Group I, comparable ratios between whole-body and tissue-specific Lyso-IPs; Group II, increase in tissue-specific Lyso-IPs ( $P < 0.05$  by student's t-test); Group III, decrease in tissue-specific Lyso-IPs ( $P < 0.05$  by student's t-test); Group IV, absent in tissue-specific IPs.

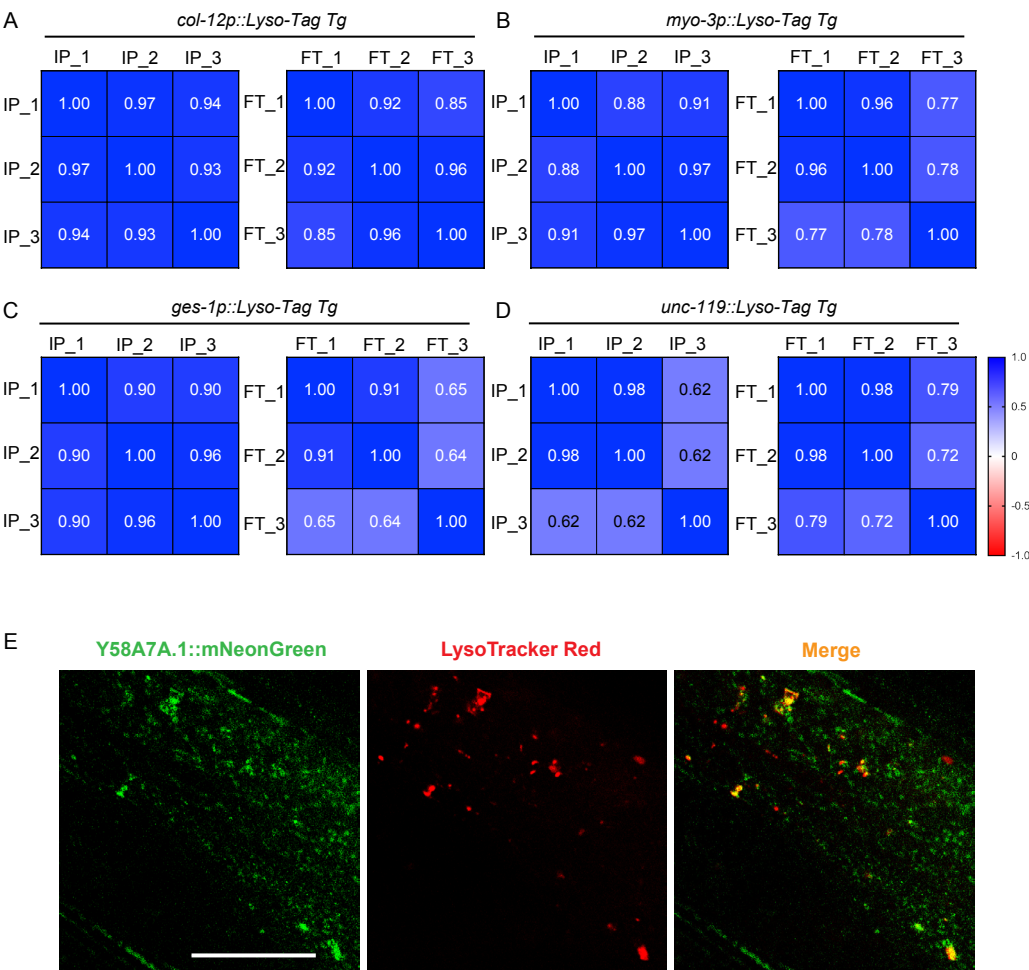

**Figure 3—figure supplement 1.** Tissue-specific Lyso-IPs and candidate imaging. (A–D) Pearson Correlation matrices of tissue-specific lyso-IP (IP) samples and flow-through (FT) samples show the correlation among three different replicates. (A) Hypodermis, (B) Muscle, (C) Intestine, (D) Neuron. (E) Representative images showing colocalization of Y58A7A.1::mNeonGreen and LysoTracker Red in the hypodermis. Scale bar = 20  $\mu$ m.

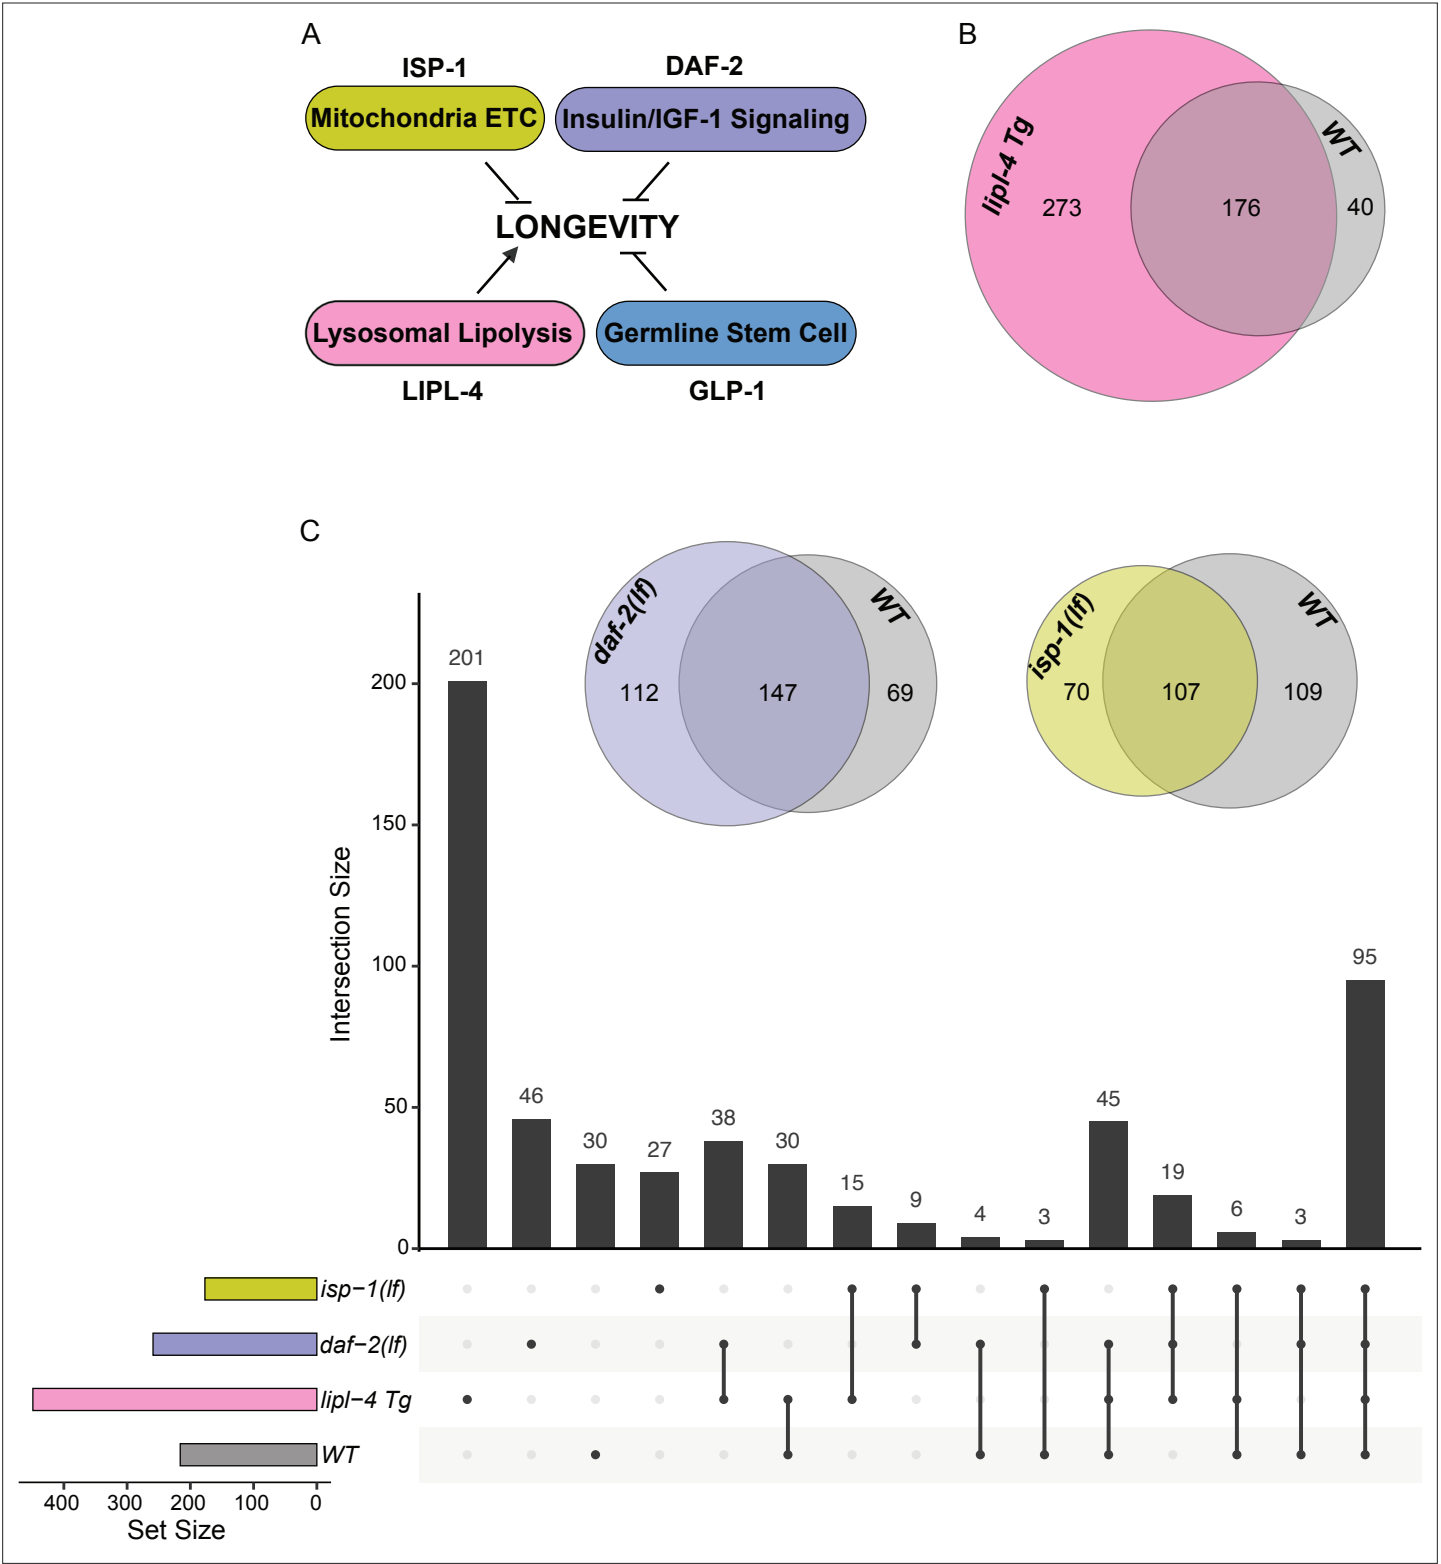

**Figure 4.** Lysosomal proteome in different pro-longevity models. **(A)** Scheme showing four different longevity regulatory mechanisms used in this study. Loss-of-function mutants (*lf*) of *isp-1*, *daf-2*, and *glp-1* reduce mitochondrial electron transport chain (ETC) complex III, insulin/IGF-1 signaling, and germline stem cell proliferation, respectively, leading to lifespan extension; while increasing lysosomal lipolysis by *lipl-4* transgenic overexpression (*lipl-4 Tg*) promotes longevity. **(B)** Venn diagram showing the overlap between the lysosome-enriched proteomes from wild-type (WT) and *lipl-4 Tg* worms. **(C)** Upset graph showing the distribution and overlap of lysosome-enriched proteins across the four pro-longevity models. Inserted Venn diagram showing the overlaps between the lysosome-enriched proteomes of WT worms and the long-lived *daf-2(lf)* and *isp-1(lf)* mutants.

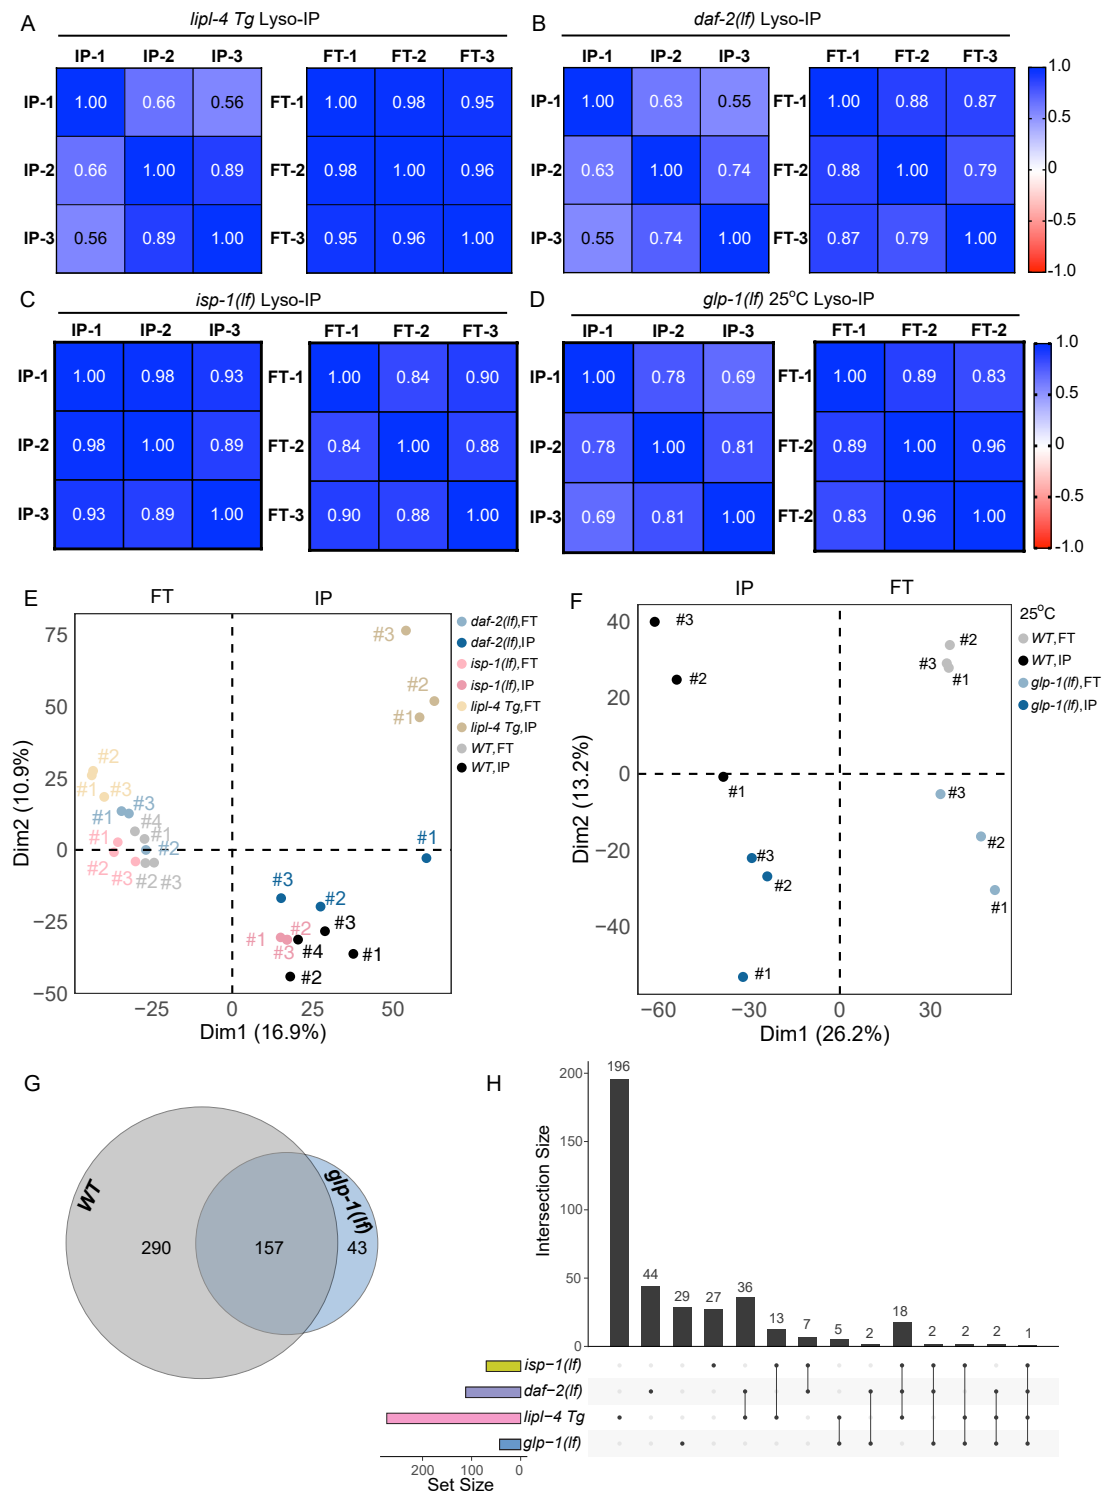

**Figure 4—figure supplement 1.** Lyso-IP analyses from different long-lived strains. (A–D) Correlation analysis of three independent biological replicates of Lyso-IP (IP) and Flow-through (FT) from proteomics analyses of the long-lived *lipl-4* transgenic strain *lipl-4* Tg, (A), the *daf-2* loss-of-function mutant (*daf-2(lf)*), (B), the *isp-1* loss-of-function mutant (*isp-1(lf)*), (C) and *glp-1* loss-of-function mutant grown in 25°C (*glp-1(lf)* 25°C), (D). (E) PCA analysis of Lyso-IP replicates (IP) and flow-through controls (FT) in LMP-1 Lyso-IP of WT, *lipl-4* Tg, *daf-2(lf)*, and *isp-1(lf)* worms. (F) PCA analysis of Lyso-IP replicates (IP) and flow-through controls (FT) in LMP-1 Lyso-IP of WT, *lipl-4* Tg, *daf-2(lf)*, and *isp-1(lf)* worms. (G) Venn diagram showing the overlap of proteins identified in WT (290) and *glp-1(lf)* (43) Lyso-IP. The intersection contains 157 proteins. (H) Bar chart showing the intersection size of proteins identified in WT, *lipl-4* Tg, *daf-2(lf)*, and *glp-1(lf)* Lyso-IP. The intersection size is 196 for WT, 44 for *lipl-4* Tg, 29 for *daf-2(lf)*, 27 for *glp-1(lf)*, and 36 for the intersection of all four. The set size is 200 for WT, 100 for *lipl-4* Tg, 100 for *daf-2(lf)*, 100 for *glp-1(lf)*, and 100 for the intersection of all four.

Figure 4—figure supplement 1 continued on next page

Figure 4—figure supplement 1 continued

and flow-through controls (FT) in LMP-1 Lyso-IP of WT and *glp-1(lf)* worms grown at 25°C. **(G)** Venn diagram showing the overlap between the lysosome-enriched proteomes from WT and *glp-1(lf)* worms grown at 25°C. **(H)** Upset graph showing the overlap of lysosome-enriched proteins present in the long-lived worms but absent from WT worms.



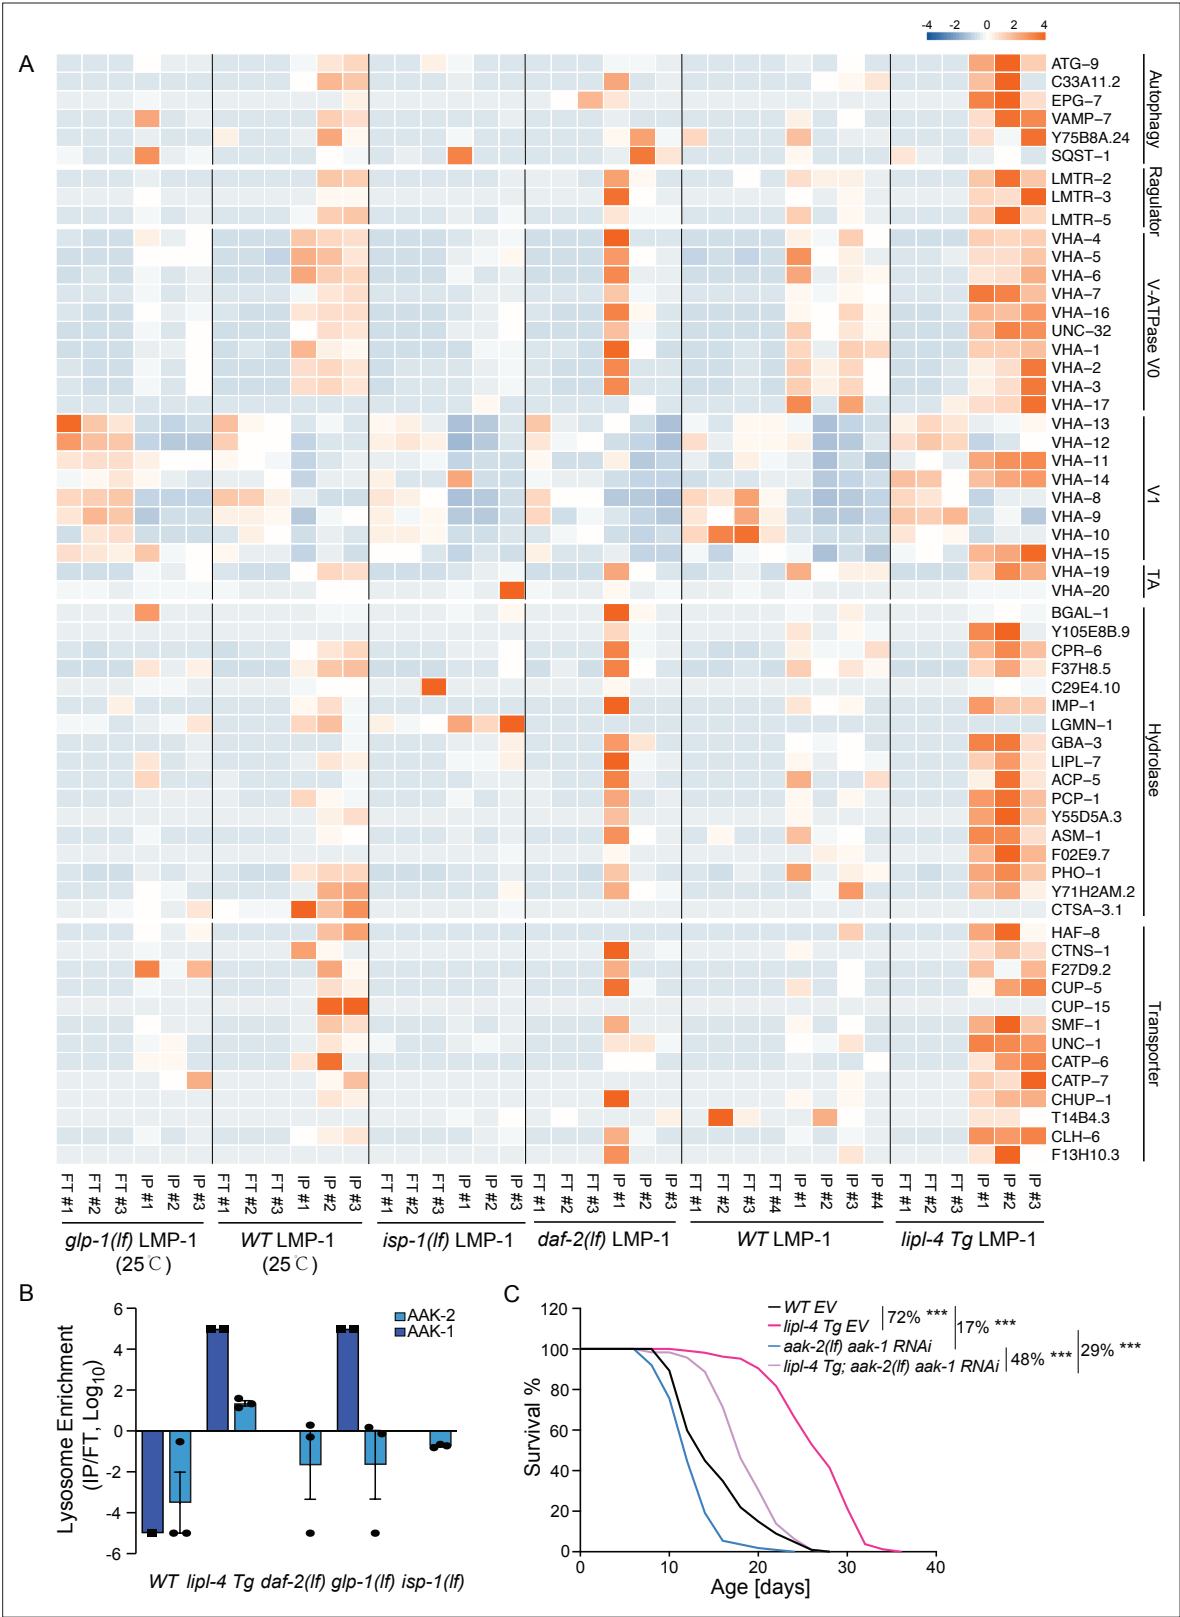

**Figure 5.** Increased enrichment of lysosomal proteins upon lysosomal lipolysis. **(A)** Normalized protein levels (z-score across samples) of autophagy-related components, mTORC1 signaling factors, lysosomal v-ATPase V0, V1, and transporting accessory (TA) subunits, lysosomal hydrolases and transporter proteins from LMP-1 Lyso-IP proteomic analyses of WT, *lipI-4 Tg*, *daf-2(lf)*, *isp-1(lf)* worms grown at 20°C and WT and *glp-1(lf)* worms grown at 25°C. **(B)** The lysosomal enrichment ratio (Lyso-IP vs FT) for two homologs of AMPK catalytic subunits, AAK-1 and AAK-2 in WT, *lipI-4 Tg*, *daf-2(lf)*, *glp-1(lf)* and *isp-1(lf)* worms. **(C)** Survival curve showing survival percentage over age in days for WT EV, *lipI-4 Tg* EV, *aak-2(lf) aak-1 RNAi* and *lipI-4 Tg; aak-2(lf) aak-1 RNAi*. \*\*\* indicates statistical significance (p < 0.001).

Figure 5 continued on next page

Figure 5 continued

*isp-1(lf)* and *glp-1(lf)* worms. (C) Reduction of AMPK using the loss-of-function mutant of *aak-2*, *aak-2(lf)* together with *aak-1* RNAi knockdown decreases lifespan by 17% and 29% in the WT and *lipI-4 Tg* background, respectively. As a result, the lifespan extension caused by *lipI-4 Tg* is reduced from 72% to 48%. \*\*\*  $P < 0.001$  by Log-rank test. The lifespan data are also in **Supplementary file 8**.

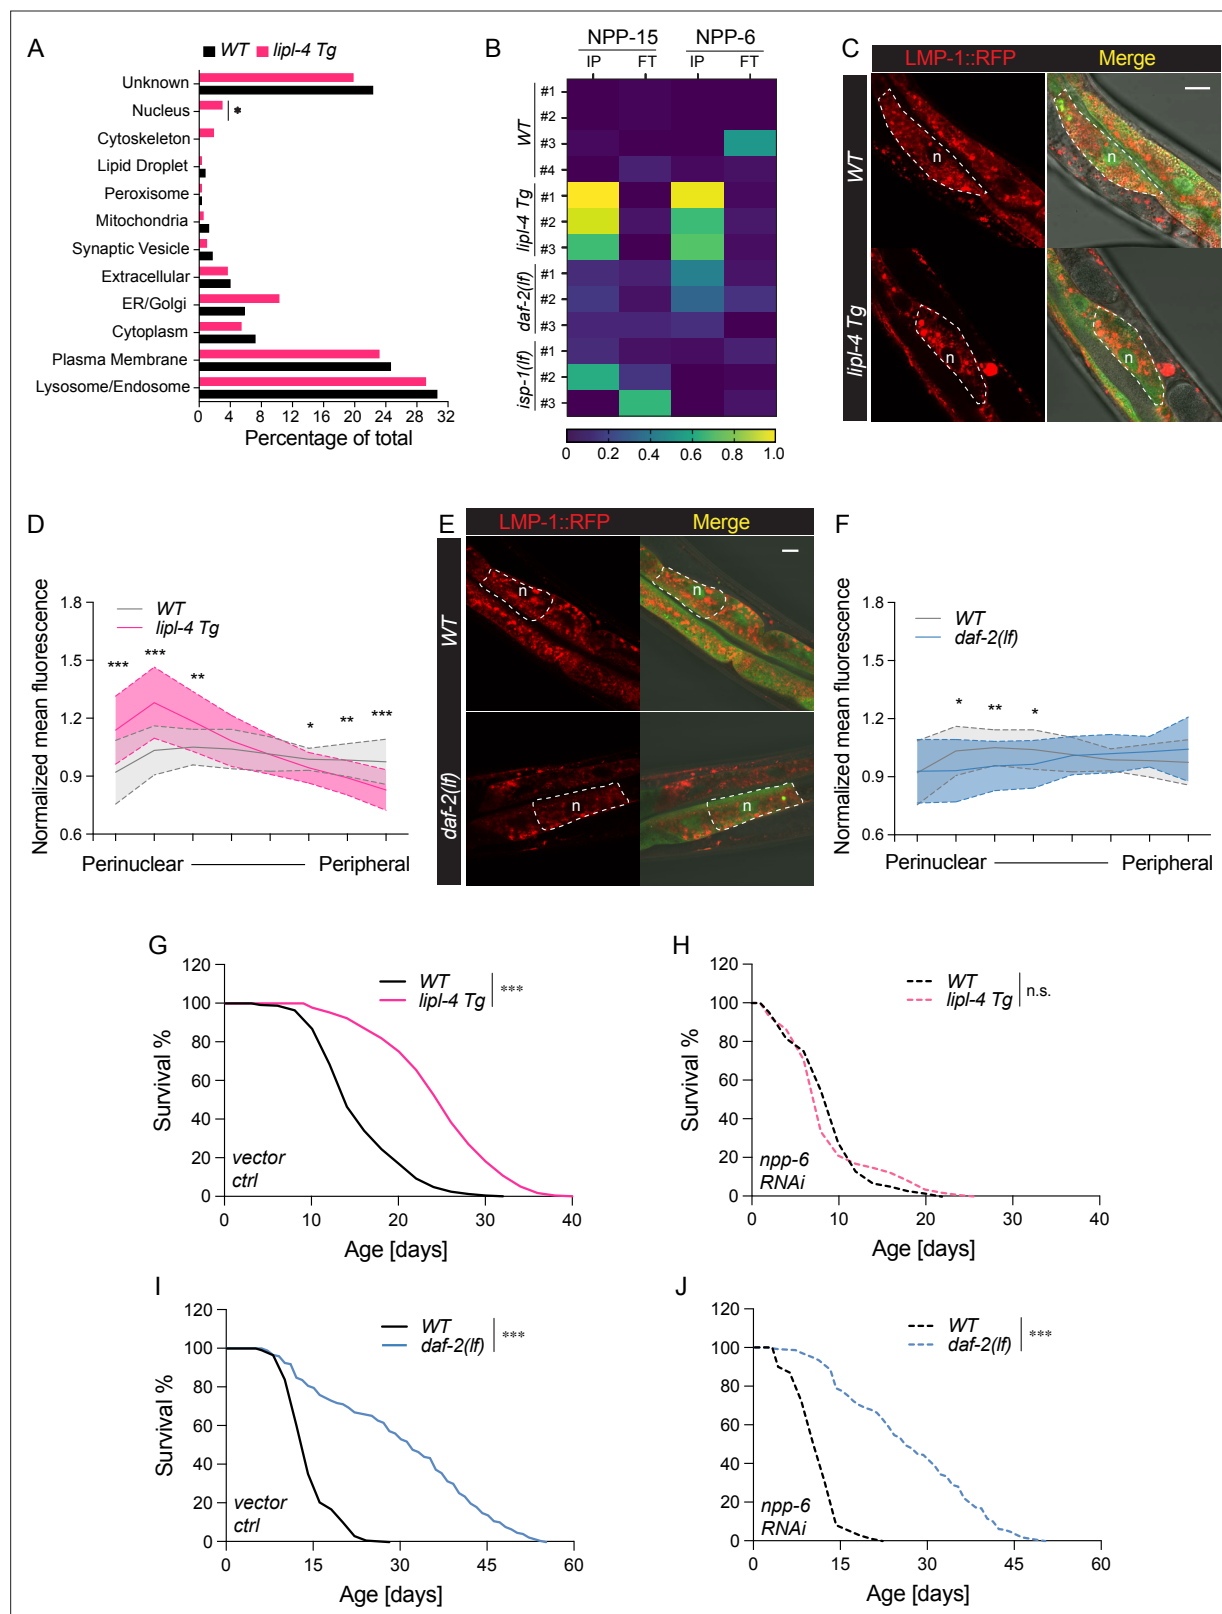

**Figure 6.** Enhanced lysosome-nucleus proximity contributing to longevity. **(A)** The percentage of proteins with different subcellular localization is compared between lysosome-enriched proteomes from WT and *lipI-4 Tg* worms. \*  $P=0.019$  by 2-sample test for equality of proportions. **(B)** Heatmap showing the average levels of nucleoporin proteins NPP-6 and NPP-15 in Lyso-IP (IP) and flow-through (FT) samples from WT, *lipI-4 Tg*, *daf-2(lf)*, and *isp-1(lf)* worms. **(C, E)** Representative images of intestinal cells in WT, *lipI-4 Tg* **(C)**, and *daf-2(lf)* **(E)** worms carrying LMP-1::RFP-3xHA and nucleus-enriched

Figure 6 continued on next page

## Figure 6 continued

GFP, showing the accumulation of lysosomes around the perinuclear region in the *lipl-4 Tg* but not *daf-2(lf)* worms. Dashed lines circle intestinal cells and n marks the nucleus. Scale bar = 20  $\mu$ m. **(D, F)** Line graph showing the spatial distribution of lysosomes from the nuclear to peripheral region quantified by normalized regional RFP fluorescence signals in intestinal cells of WT, *lipl-4 Tg* **(D)**, and *daf-2(lf)* **(F)** worms. N=50 WT /33 *lipl-4 Tg*, 33 WT/ 28 *daf-2(lf)*. Data are represented as mean  $\pm$  SD. *p* values for **(D)** (from left to right):  $1.23 \times 10^{-7}$ ,  $2.25 \times 10^{-5}$ , 0.00322, 0.368, 0.273, 0.0447, 0.00268,  $1.20 \times 10^{-5}$ ; *p* values for **(F)** (from left to right): 0.633, 0.0211, 0.00259, 0.0359, 0.767, 0.151, 0.106, 0.0671. **(G–H)** *lipl-4 Tg* worms show lifespan extension compared to WT worms **(G)**, which is fully suppressed by RNAi knockdown of *npp-6* **(H)**. \*\*\**P*<0.001, n.s. *P*>0.05 by Log-rank test. **(I–J)** *daf-2(lf)* worms show lifespan extension compared to WT worms **(I)**, which is not affected by *npp-6* RNAi knockdown **(J)**. \*\*\**P*<0.001 by Log-rank test. The lifespan data are also in **Supplementary file 8**.

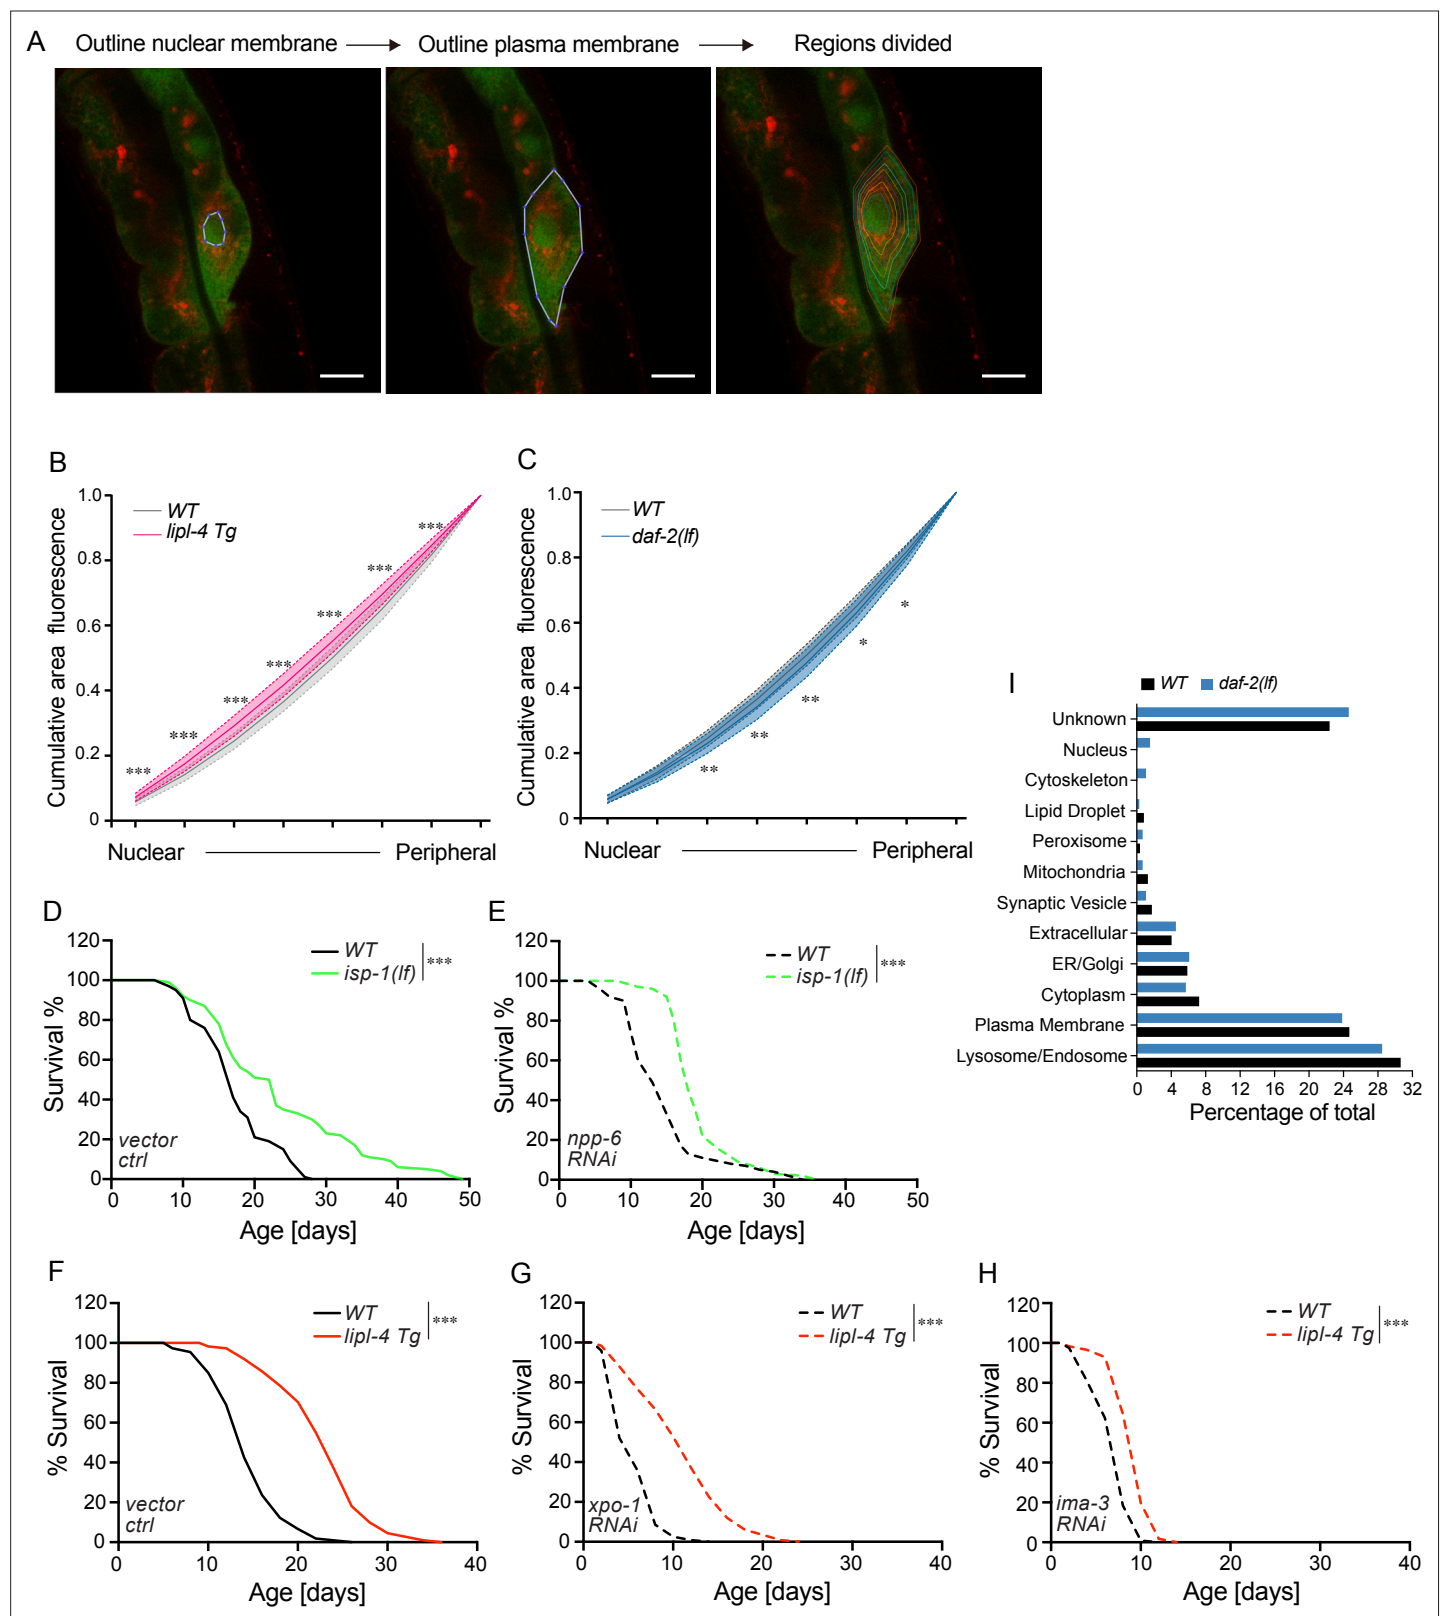

**Figure 6—figure supplement 1.** Lysosomal positioning in longevity regulation. **(A)** Summary of the method flow for quantifying the lysosomal distribution in intestinal cells of *C. elegans*. Scale bar = 10  $\mu$ m. **(B, C)** Curve graph showing the normalized accumulated intensity of lysosomal signals from the nuclear to the peripheral region in WT, *lip1-4 Tg* **(B)**, and *daf-2(lf)* **(C)** animals. \* $P < 0.05$ ; \*\* $P < 0.01$ ; \*\*\* $P < 0.001$ ; \*\*\*\* $P < 0.0001$ , n.s.  $P > 0.05$  by Student's t-test (unpaired, two-tailed) for each region. N=50 WT /33 *lip1-4 Tg*, 33 WT/ 28 *daf-2(lf)*. Data are represented as mean  $\pm$  SD. *p* values for Figure 6—figure supplement 1 continued on next page

## Figure 6—figure supplement 1 continued

(B) (from left to right):  $2.65 \times 10^{-8}$ ,  $3.19 \times 10^{-8}$ ,  $7.93 \times 10^{-8}$ ,  $3.62 \times 10^{-7}$ ,  $4.79 \times 10^{-6}$ ,  $2.98 \times 10^{-5}$ ,  $4.41 \times 10^{-5}$ ; p values for (C) (from left to right): 0.357, 0.0529, 0.00611, 0.00246, 0.00985, 0.0261, 0.0423. (D–E) *isp-1(lf)* worms show lifespan extension compared to WT worms (D), which is not affected by RNAi knockdown of *npp-6* (E). \*\*\* $P < 0.001$  by Log-rank test. (F–H) *lipI-4* Tg worms show lifespan extension compared to WT worms (F), which is not affected by *xpo-1* RNAi knockdown (G) and is partially suppressed by RNAi knockdown of *ima-3* (H). \*\*\* $P < 0.001$  by Log-rank test. The lifespan data are also in **Supplementary file 8**. (I). The percentage of proteins with different subcellular localization is compared between lysosome-enriched proteomes from WT and *daf-2* worms.

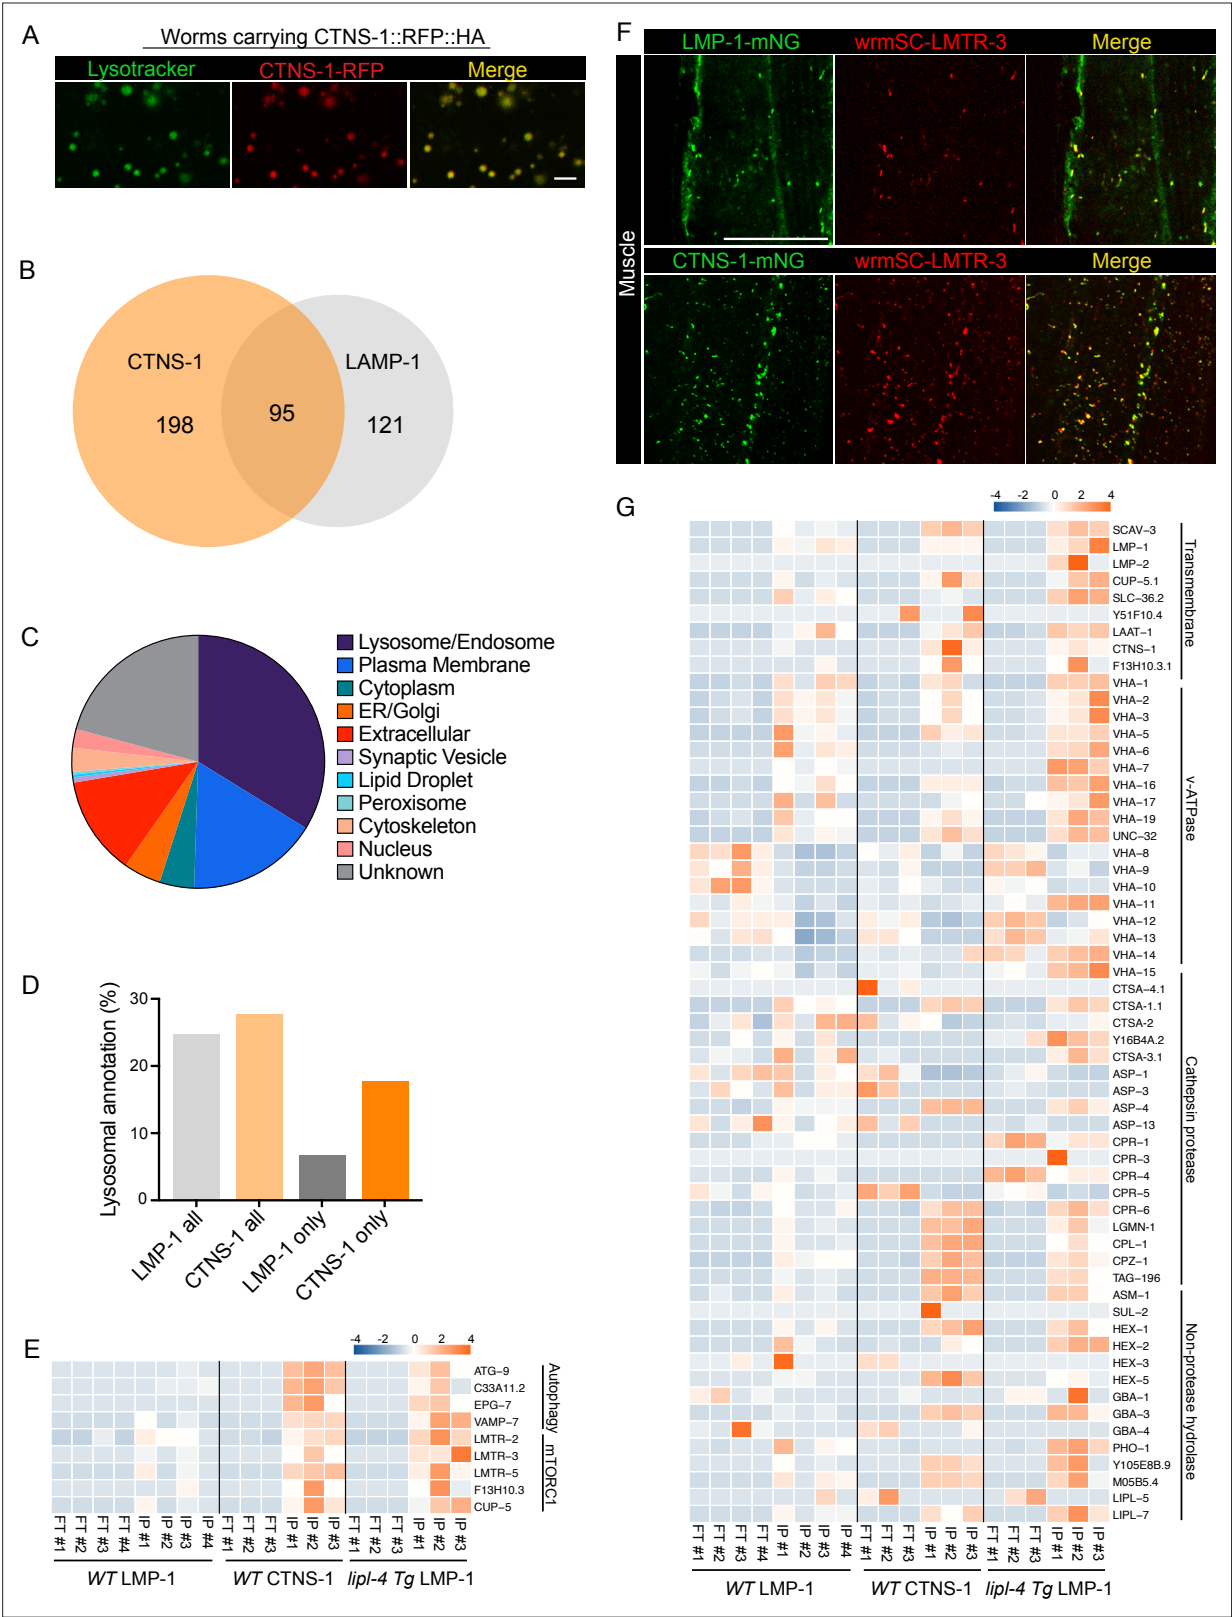

**Figure 7.** Lysosome-enriched proteome identified with Cystinosin. **(A)** Example images of transgenic strains carrying CTNS-1 Lyso-Tag (CTNS-1::RFP-3×HA) with LysoTracker staining to mark lysosomes in vivo. Scale bar = 5 μm. **(B)** Venn diagram showing the overlap between lysosome-enriched proteomes using LMP-1 Lyso-IP and CTNS-1 Lyso-IP. **(C)** Pie chart showing subcellular location categories of lysosome-enriched proteins. **(D)** The proportion of candidates with lysosomal localization annotation in different candidate groups. 'LMP-1 all' and 'CTNS-1 all', all candidates from LMP-1

Figure 7 continued on next page

## Figure 7 continued

Lyso-IP and CTNS-1 Lyso-IP, respectively; 'LMP-1 only' and 'CTNS-1 only', candidates only identified from LMP-1 Lyso-IP or CTNS-1 Lyso-IP, respectively. (E) Normalized protein levels (z-score across samples) of autophagy-related components and mTORC1 signaling factors from CTNS-1 Lyso-IP proteomic analyses of WT worms and LMP-1 Lyso-IP proteomic analyses of WT and *lipI-4* *Tg* worms. (F) Representative muscle images in the *wrmScarlet::LMTR-3* knock-in line crossed with either LMP-1::mNeonGreen knock-in line or CTNS-1::mNeonGreen knock-in line. Scale bar = 20  $\mu$ m. (G) Normalized protein levels (z-score across samples) of previously annotated lysosomal proteins from LMP-1 Lyso-IP proteomic analyses of WT and *lipI-4* *Tg* worms and CTNS-1 Lyso-IP proteomic analyses of WT worms.



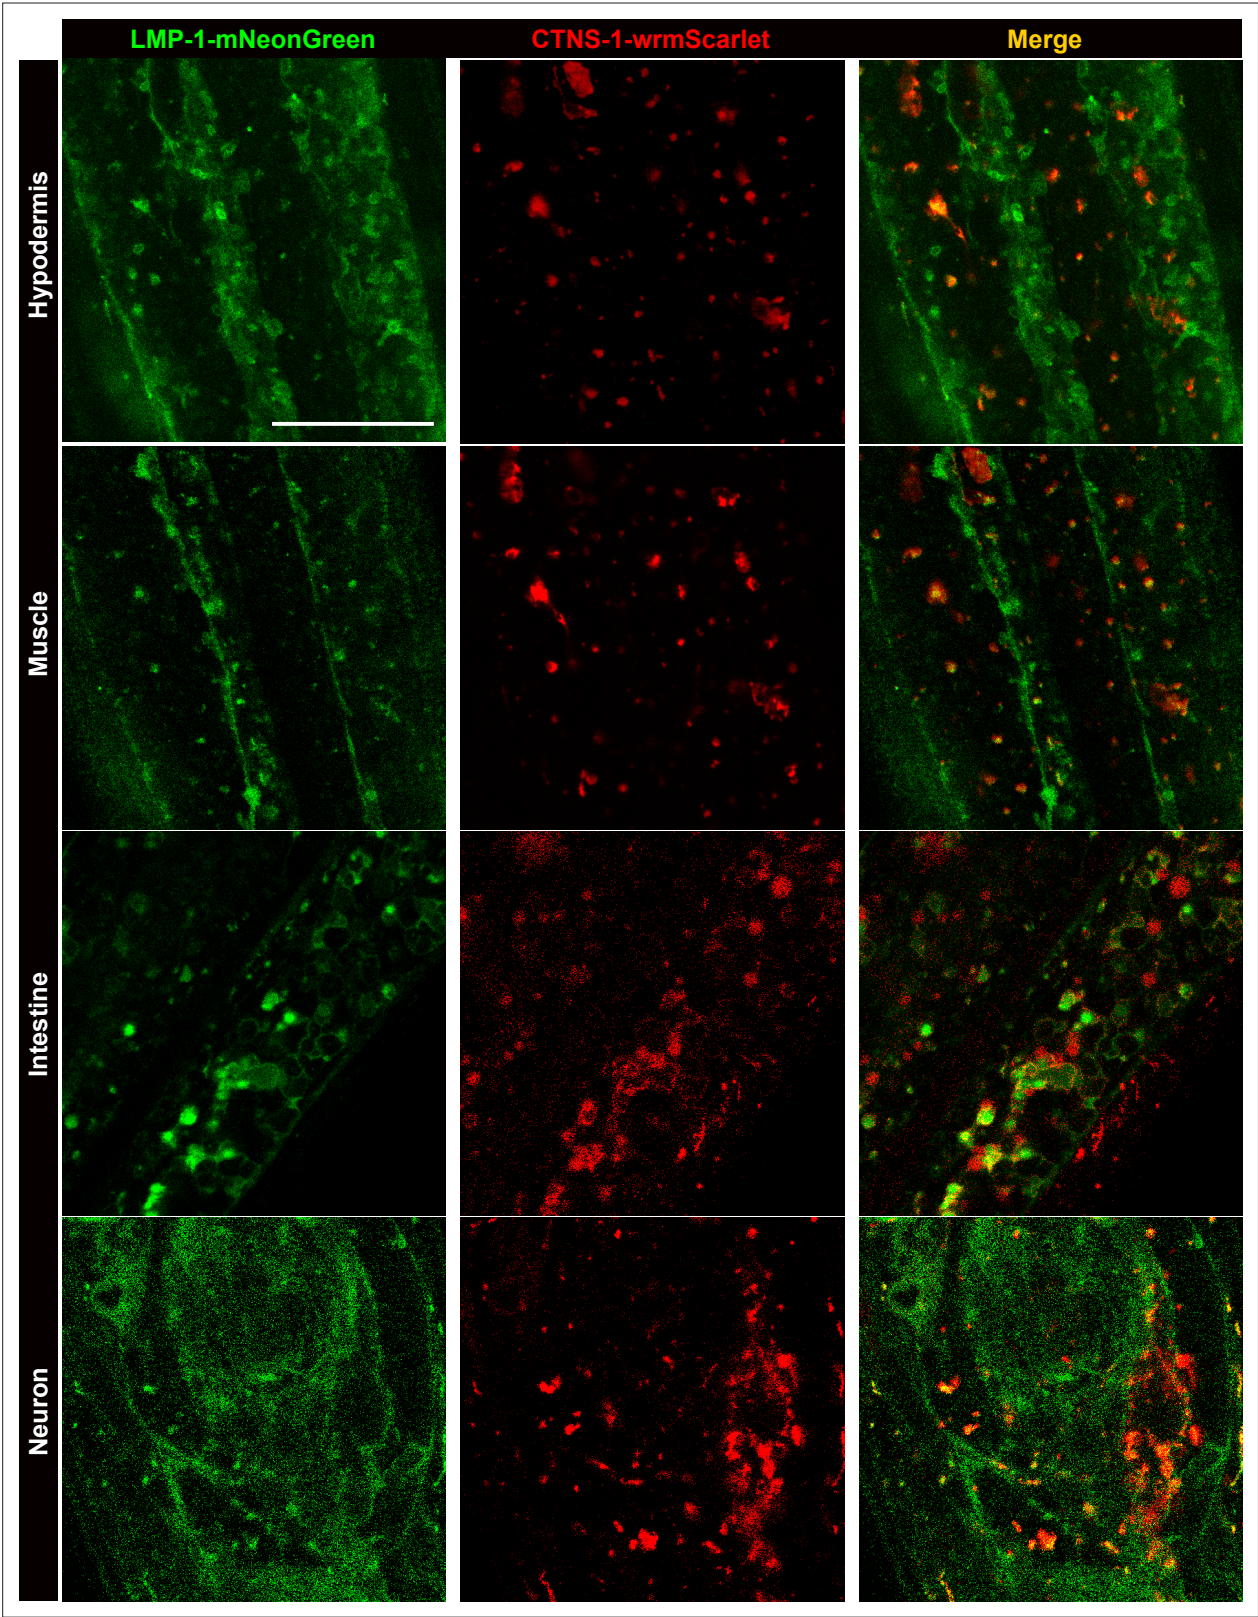

**Figure 7—figure supplement 1.** The colocalization between LMP-1::mNeonGreen and CTNS-1::wrmScarlet in different tissues. Representative images of knock-in lines with both LMP-1::mNeonGreen and CTNS-1::wrmScarlet show partial colocalization between LMP-1 and CTNS-1 signals in different tissues. Scale bar = 20  $\mu$ m.

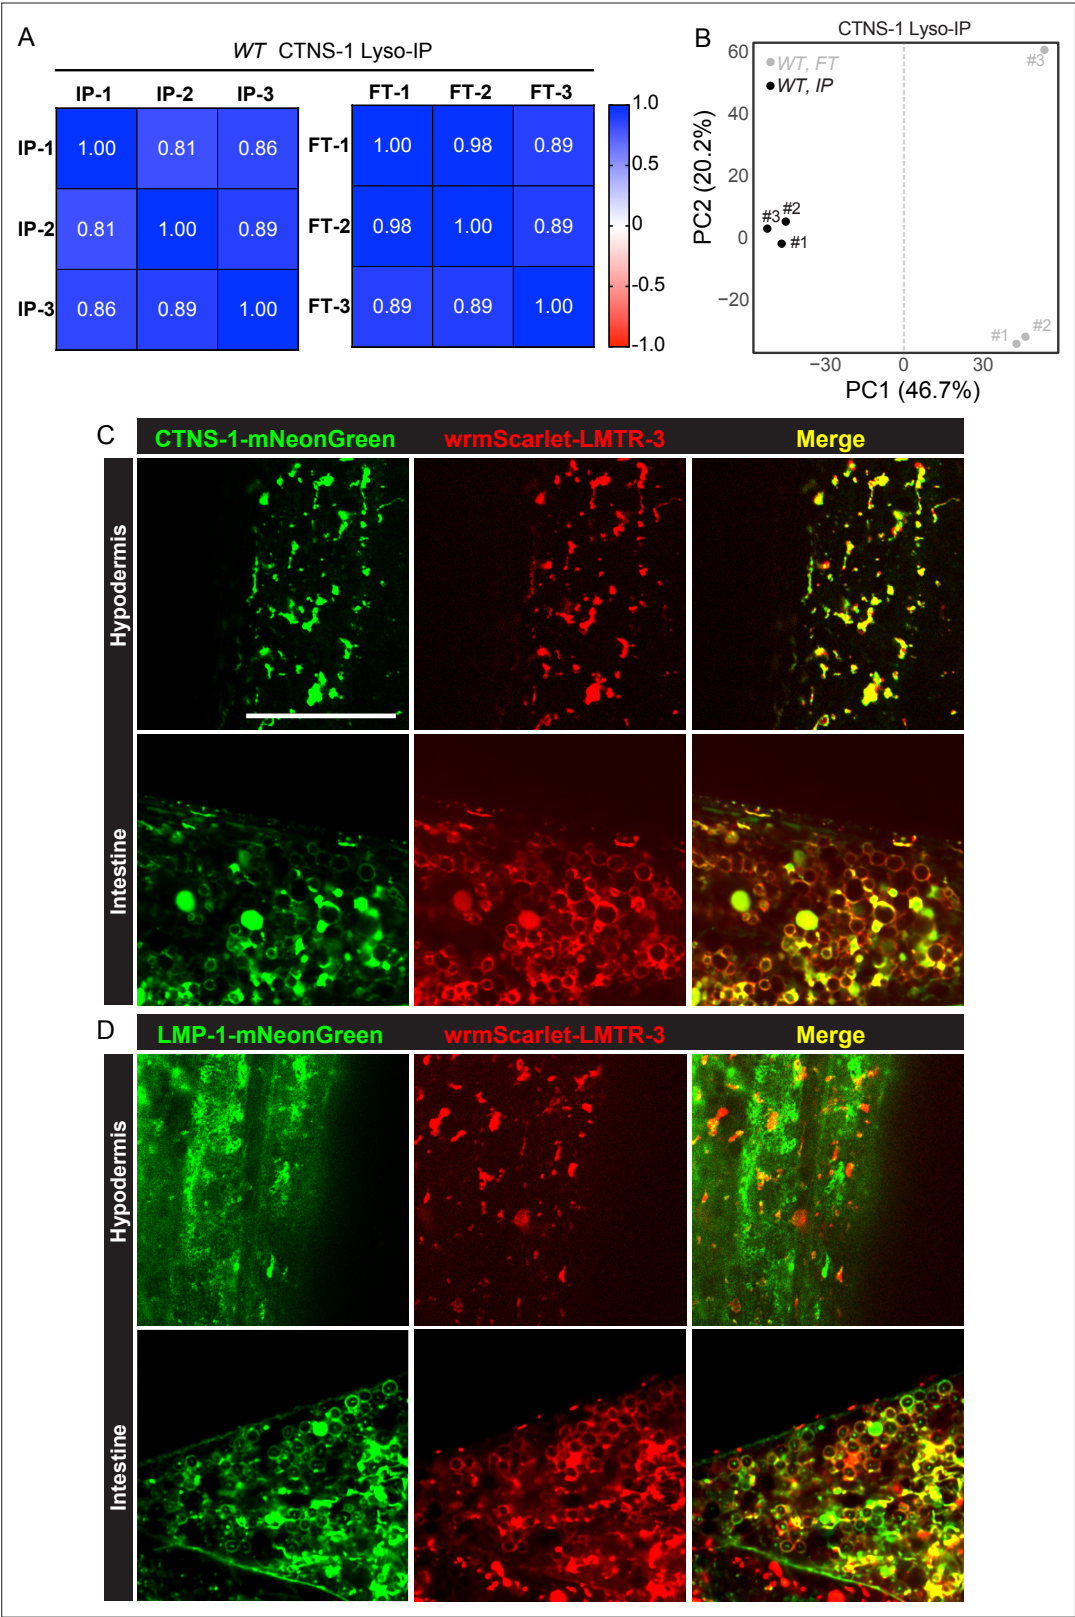

**Figure 7—figure supplement 2.** CTNS-1 Lyso-IPs and LMTR-3 imaging analyses. **(A)** Correlation analysis of three independent biological replicates of CTNS-1 Lyso-IP (IP) and Flow-through (FT). **(B)** PCA analysis of three independent biological replicates of CTNS-1 Lyso-IP (IP) and Flow-through (FT). **(C, D)** Example images of knock-in lines with wrmScarlet::LMTR-3 and CTNS-1::mNeonGreen **(C)** and LMP-1::mNeonGreen **(D)** in hypodermis and intestine. Scale bar = 20  $\mu$ m.

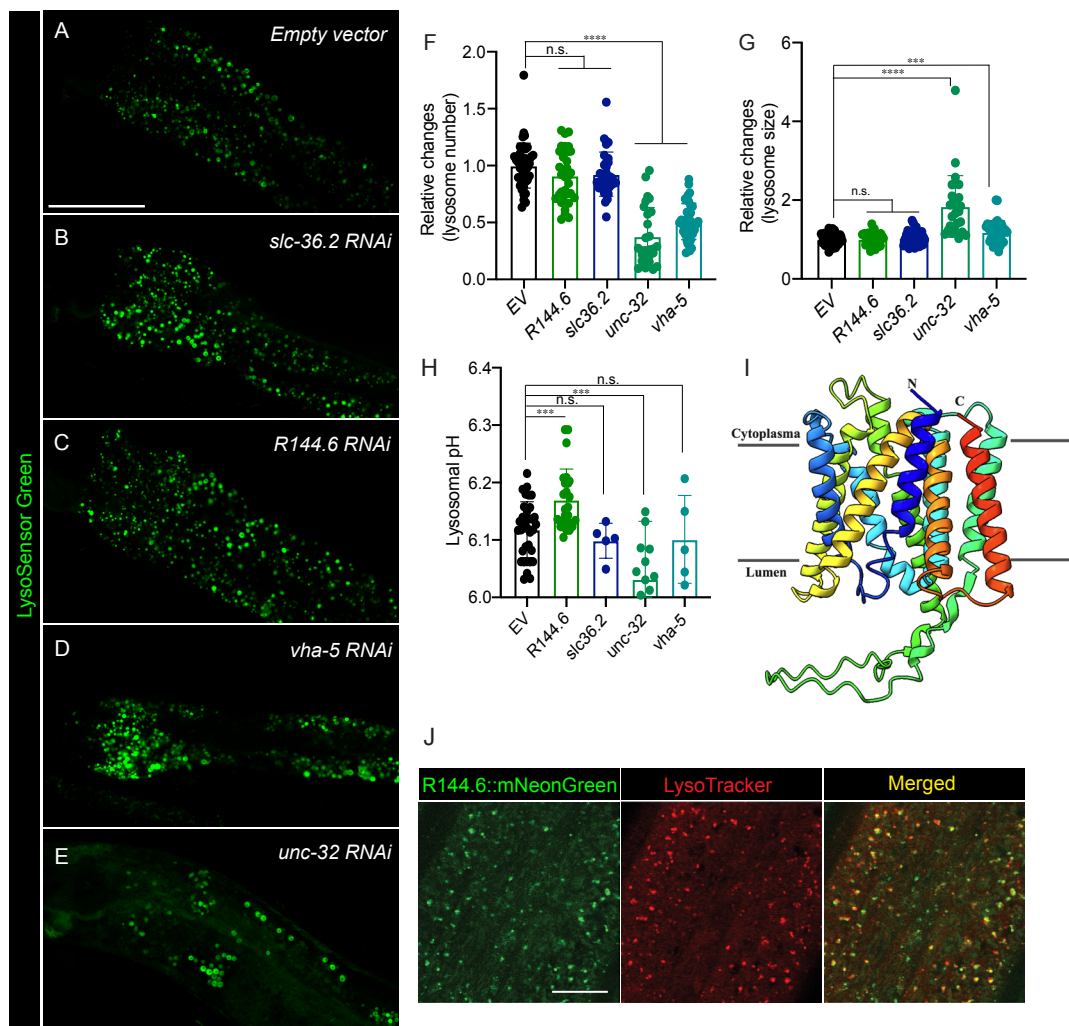

**Figure 8.** Lysosome-enriched proteins regulating lysosomal functions. (A-E) Confocal fluorescence microscopy images of intestinal cells in worms stained with LysoSensor DND-189 and treated with empty vector (A), *slc36.2* RNAi (B), *R144.6* RNAi (C), *vha-5* RNAi (D) and *unc-32* RNAi (E). Scale bar = 50  $\mu$ m. (F, G) RNAi knockdown of *unc-32* or *vha-5* decreases the lysosome number (\*\*\*\* $P < 0.0001$ ) (F) but increases the lysosome size (\*\*\*\* $P < 0.0001$ , \*\*\* $P < 0.001$ ) (G). The average lysosome number and size per pair of intestinal cells were quantified. Data are shown as mean  $\pm$  standard deviation (SD).

Figure 8 continued on next page

## Figure 8 continued

Student *t*-test (unpaired, two-tailed) was performed between the *empty vector* and RNAi-treated groups. At least three independent experiments with ~10 worms in each were performed for each condition. n.s.  $P>0.05$ , (H) RNAi knockdown of *R144.6* and *unc-32* ( $***P<0.001$ ) increase and decrease lysosomal pH, respectively. Lysosomal pH was calculated based on LysoSensor's lifetime measured by Fluorescence Lifetime Microscopy. Data are shown as mean  $\pm$  SD. Student *t*-test (unpaired, two-tailed) was performed between the *empty vector* and RNAi-treated groups. Two independent experiments with at least 5 worms in each were performed in *R144.6* RNAi and *unc-32* RNAi conditions. The *vha-5* and *slc36.2* RNAi knockdown did not show significant changes in one replicate and were not retested with another replicate. n.s.  $P>0.05$ . (I) The structure of the R144.6 protein predicted by AlphaFold2 supports it as a solute carrier family transporter. (J) Confocal fluorescence microscopy images show that mNeonGreen signals from endogenously tagged R144.6 colocalize with LysoTracker Red signals in the hypodermis. Scale bar = 10  $\mu$ m.



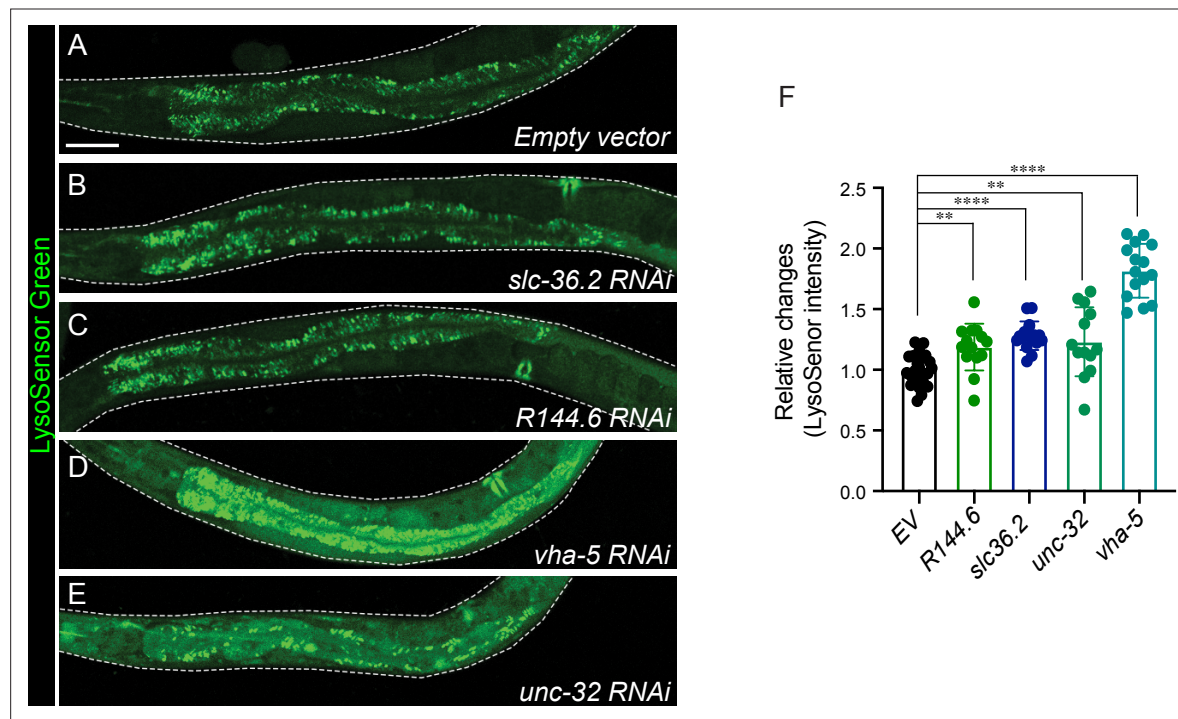

**Figure 8—figure supplement 1.** LysoSensor intensity quantification in five candidates. The LysoSensor signals are visualized by confocal fluorescence microscopy in *empty vector* (A), *slc36.2 RNAi* (B), *R144.6 RNAi* (C), *vha-5 RNAi* (D), and *unc-32 RNAi* (E) conditions. Scale bar = 50  $\mu$ m. The relative LysoSensor changes were quantified in (F). ~10 worms were quantified in each condition. Data are shown as mean  $\pm$  SD. Student t-test (unpaired, two-tailed) was performed between the *empty vector* and RNAi-treated groups. (\*\* $P < 0.01$ , \*\*\*\* $P < 0.0001$ ).
