# Supplementary material for: Organelle proteomic profiling reveals lysosomal heterogeneity in association with longevity
Source: eLife. 2024 Jan 19;13:e85214. doi: 10.7554/eLife.85214 (PMC10876212; doi:10.7554/eLife.85214)
Supplement: Supplementary file 2. [file elife-85214-supp2.xlsx]

## Sheet: Sheet1
Table S2 Lysosome-enriched proteome exhibits tissue-specificity
Whole-body						Intestine-only						Muscle-only						Hypodermis-only						Neuron-only
Protein Name	Normalized to LMP-1*					Protein Name	Normalized to LMP-1*			p-value#		Protein Name	Normalized to LMP-1*			p-value#		Protein Name	Normalized to LMP-1*			p-value#		Protein Name	Normalized to LMP-1*			p-value#
LMP-1	1	1	1	1		LMP-1	1	1	1	n.a.		LMP-1	1	1	1			LMP-1	1	1	1	n.a.		LMP-1	1	1	1	n.a.
ABTS-4	0.00249066	0.00022358	0.00158582	0.0001993		ABTS-4	0	0.000520291	0.00240566	0.874633		ABTS-4	0	0	0	0.149625		ABTS-4	0	0	0	0.149625		ABTS-4	0	0	0.00303448	0.920049
AC3.5	0.212951	0.0603658	0.0545709	0.0608441		AC3.5	0.0859917	0.0905307	0.0627358	0.721762		AC3.5	0.155556	0.0145661	0.0185841	0.59203		AC3.5	0.167544	0.0783784	0.0770713	0.848509		AC3.5	0.112285	0.122034	0.0586207	0.992755
AMAN-1	0.0473225	0.0178862	0.0140858	0.0147714		AMAN-1	0.00138696	0.00468262	0.00353774	0.0848812		AMAN-1	0	0	0	0.0550846		AMAN-1	0.000263158	0	0.00240848	0.0622844		AMAN-1	0.00237781	0.00118644	0	0.0646776
ARRD-13	0.00884184	0.00119919	1.8657e-05	0.0014068		ARRD-13	0.00540915	0	0	0.721669		ARRD-13	0	0	0	0.283069		ARRD-13	0	0	0	0.283069		ARRD-13	0.00766182	0.0237288	0	0.282957
ARRD-18	0.00120797	0.00030488	0.00050373	0.00101993		ARRD-18	0	0.00426639	0.00264151	0.208754		ARRD-18	0.00296296	0.0017562	0.000929204	0.098447		ARRD-18	0.000964912	0.000439189	0.000876686	0.996983		ARRD-18	0	0	0.00372414	0.670669
ATGP-1	0.0824408	0.0585366	0.023041	0.06483		ATGP-1	0.0527046	0.136316	0.0669811	0.331448		ATGP-1	0.112593	0.0369835	0.069469	0.531423		ATGP-1	0.0517544	0.0290541	0.0115607	0.195069		ATGP-1	0.143989	0.0694915	0.101379	0.0958936
BAM-2	0.0001868	0.00058943	0.00026119	0.00785463		BAM-2	0.00235784	0.00426639	0.00330189	0.652749		BAM-2	0.000740741	0.000144628	0.00137168	0.541041		BAM-2	0	0.00027027	0.000163776	0.393046		BAM-2	0.00594452	0.657627	0.00441379	0.279873
BEST-14	0.00884184	0.00115854	0.00382463	0.0021102		BEST-14	0.0135922	0.00863684	0.00221698	0.277457		BEST-14	0.00933333	0.000154959	0.000575221	0.85271		BEST-14	0.0175439	0.00878378	0.0119461	0.0309211		BEST-14	0.0198151	0.00101695	0.00124138	0.572513
C18E9.9	0.0582814	0.00028455	0.0115672	0.0127784		C18E9.9	0.0568655	0.0353798	0.0693396	0.113627		C18E9.9	0.00933333	0.00330579	0.0212389	0.57659		C18E9.9	0.0263158	0.0219595	0.00722543	0.894253		C18E9.9	0.0594452	0.020339	0.1	0.170617
C23H3.2	0.0169365	0.00134146	0.00839552	0.00106682		C23H3.2	0.00305132	0.00343392	0.00566038	0.547563		C23H3.2	0.0251852	0.00816116	0.00530973	0.42297		C23H3.2	0.0307018	0.00506757	0.00346821	0.507255		C23H3.2	0.0198151	0.00305085	0.00496552	0.723802
C46C2.2	0.0165629	0.0119919	0.00876866	0.0201641		C46C2.2	0.0291262	0.0437045	0.00566038	0.279892		C46C2.2	0.0311111	0.00836777	0.0190265	0.448834		C46C2.2	0.0122807	0.00371622	0.00240848	0.0907089		C46C2.2	0.0554822	0.0525424	0.0124138	0.0843876
C53D5.5	0.286426	0.0599594	0.0779851	0.0511137		C53D5.5	0.0790569	0.16129	0.125472	0.966413		C53D5.5	0.00177778	0	0	0.135046		C53D5.5	0.00578947	0.00206081	0.00549133	0.14556		C53D5.5	0.014531	0.00966102	0.00324138	0.159703
CAH-5	0.0643836	0.0235772	0.0289179	0.0796014		CAH-5	0.0568655	0.0936524	0.164151	0.130624		CAH-5	0.0444444	0.0222107	0.0486726	0.568561		CAH-5	0.0368421	0.0287162	0.00963391	0.226728		CAH-5	0.0581242	0.0644068	0.155172	0.217191
CED-7	0.0110834	0.00406504	0.00382463	0.00199297		CED-7	0.000554785	0.00332986	0.00566038	0.475403		CED-7	0.00148148	0.00144628	0	0.136071		CED-7	0.00105263	0.000135135	0.000963391	0.115804		CED-7	0.000528402	0.000169492	0.00248276	0.147715
CHAT-1	0.01868	0.00406504	0.0068097	0.0151231		CHAT-1	0.0137309	0.0197711	0.0193396	0.200929		CHAT-1	0.00874074	0	0.00345133	0.181992		CHAT-1	0.00692982	0.00290541	0.00741811	0.256977		CHAT-1	0.0198151	0.0169492	0.0137931	0.245048
CNNM-1	0.0110834	0.00345528	0.00541045	0.0114889		CNNM-1	0.00443828	0.00905307	0.00231132	0.414291		CNNM-1	0.00518519	0.000547521	0.00243363	0.109459		CNNM-1	0.00447368	0	0.000741811	0.0693606		CNNM-1	0.00435931	0.00169492	0	0.0758118
DEL-6	0.0120797	0.00264228	0.00223881	0.00064478		DEL-6	0.0277393	0.0049948	0.0193396	0.0967344		DEL-6	0.00459259	0.00268595	0.00707965	0.910396		DEL-6	0.0219298	0	0.0114644	0.32187		DEL-6	0.0237781	0.0145763	0	0.257092
DHS-1	0.0103362	0.00426829	0.0045709	0.00022274		DHS-1	0.000970874	0.0037461	0	0.268633		DHS-1	0	0	0	0.105883		DHS-1	0.00438596	0.000844595	0.00192678	0.388993		DHS-1	0	0	0.000965517	0.126991
F09G2.8	0.00722291	0.00325203	0.00186567	0.0009027		F09G2.8	0	0	0.000518868	0.115842		F09G2.8	0	0.00018595	0	0.105389		F09G2.8	0	0	0	0.10031		F09G2.8	0	0	0.00110345	0.138988
F14E5.2	0.0123288	0.00304878	0.00270522	0.00269637		F14E5.2	0.0131761	0.00655567	0.00141509	0.662816		F14E5.2	0.00355556	0.00144628	0.00345133	0.445748		F14E5.2	0.00254386	0.00202703	0.00163776	0.318802		F14E5.2	0.0101717	0.00830508	0.00827586	0.250324
F15B9.10	0.0288917	0.0191057	0.0117537	0.0213365		F15B9.10	0.00887656	0.0582726	0.0216981	0.50653		F15B9.10	0.0592593	0.0121901	0.00486726	0.742162		F15B9.10	0.0263158	0.010473	0.00635838	0.411951		F15B9.10	0.0317041	0.0644068	0.0131034	0.276816
F35E12.10	0.0493151	0.00630081	0.0142724	0.0109027		F35E12.10	0.000416089	0.0260146	0.0301887	0.92834		F35E12.10	0.00711111	0.00258264	8.84956e-05	0.209743		F35E12.10	0.00307018	0.00273649	0.00452794	0.210101		F35E12.10	0.00488771	0.00559322	0.0186207	0.429933
F36A2.9	0.0158157	0.00172764	0.00326493	0.0161782		F36A2.9	0.00513176	0.00832466	0	0.389271		F36A2.9	0.00207407	0.000506198	0.00225664	0.161586		F36A2.9	0.000877193	0.00027027	0.000346821	0.117422		F36A2.9	0.00488771	0.00847458	0.00324138	0.474644
FMO-3	0.00092154	0.00160569	9.3284e-06	0.00038687		FMO-3	0	0	0	0.134721		FMO-3	0	0	0	0.134721		FMO-3	0.000350877	0	0.00144509	0.819041		FMO-3	0	0	0	0.134721
FOLT-2	0.0353674	0.00833333	0.0718284	0.0456037		FOLT-2	0.0249653	0.0228928	0.0349057	0.459259		FOLT-2	0.00962963	0	0.0079646	0.0803166		FOLT-2	0.0166667	0.0182432	0.0115607	0.173441		FOLT-2	0.0109643	0.0130508	0.006	0.11051
GCP-2.1	0.124284	0.0465447	0.0319963	0.0373974		GCP-2.1	0.00208044	0	0.00801887	0.0781682		GCP-2.1	0.00177778	0	0	0.0677015		GCP-2.1	0.00964912	0.00540541	0.0168593	0.112864		GCP-2.1	0.000924703	0	0	0.0667446
GCY-28	0.00797011	0.00406504	0.00494403	0.00468933		GCY-28	0.0037448	0.00603538	0.00174528	0.330414		GCY-28	0.00503704	0.00144628	0.0010177	0.106302		GCY-28	0.00473684	0	0.00163776	0.0875211		GCY-28	0.00330251	0.00694915	0.00275862	0.505707
GLT-1	0.0262765	0.00426829	0.0197761	0.0153576		GLT-1	0.0332871	0.0135276	0.00990566	0.773413		GLT-1	0.0177778	0.00909091	0.00530973	0.406765		GLT-1	0.111404	0.0344595	0.044605	0.0743081		GLT-1	0.0541612	0.0677966	0.0144828	0.100626
GLY-7	0.0135741	0.00030488	0.00177239	0.00128957		GLY-7	0.00499307	0.00187305	0	0.638578		GLY-7	0.000740741	0	0	0.331097		GLY-7	0.00307018	0.000439189	0	0.455014		GLY-7	0.00435931	0.00508475	0	0.793237
GPA-17	0.00236613	0.00034553	0.00139925	0.000551		GPA-17	0.00138696	0.00156087	0.0029717	0.293247		GPA-17	0	0.000165289	0.000132743	0.108632		GPA-17	0	0	0	0.0854891		GPA-17	0	0	0	0.0854891
GSA-1	0.00996264	0.00589431	0.00783582	0.00304807		GSA-1	0.0152566	0.00489074	0.0132075	0.220977		GSA-1	0.0266667	0.00299587	0	0.677879		GSA-1	0.00964912	0	0.00472062	0.543316		GSA-1	0.0171731	0	0	0.857838
HAF-4	0.4533	0.141667	0.215485	0.146542		HAF-4	0.373093	0.477627	0.252358	0.265252		HAF-4	0.0162963	0.00123967	0.00442478	0.044294		HAF-4	0.0114035	0.00506757	0.0026975	0.0436359		HAF-4	0.0713342	0.0457627	0.0386207	0.0842645
HAF-9	0.678705	0.262195	0.30597	0.157093		HAF-9	0.552011	0.700312	0.504717	0.162128		HAF-9	0.0177778	0.000578512	0.00274336	0.0508233		HAF-9	0.0210526	0.000472973	0.00134875	0.0511445		HAF-9	0.175694	0.127119	0.0227586	0.142993
HMR-1	0.00298879	0.00132114	0.00022388	0.00187573		HMR-1	0.000554785	0.00187305	0.00183962	0.824937		HMR-1	0.00192593	0.000444215	0.00110619	0.58936		HMR-1	0.000789474	0.000608108	0.000250482	0.189558		HMR-1	0.0015852	0.00271186	0.00151724	0.674866
INA-1	0.00473225	0.00109756	0.00084888	0.0024619		INA-1	0.00124827	0.00197711	0.00518868	0.736564		INA-1	0	0.000454545	0.000840708	0.144341		INA-1	0.000175439	0.000675676	0.000327553	0.134196		INA-1	0.00237781	0.000677966	0.0144828	0.390038
INX-12	0.0202989	0.0260163	0.0197761	0.0063306		INX-12	0.0346741	0.057232	0.0179245	0.145225		INX-12	0.0340741	0.00196281	0.0110619	0.808104		INX-12	0.0394737	0.0118243	0.0525048	0.200207		INX-12	0.0303831	0.0711864	0.0337931	0.0741132
INX-5	0.00797011	0.0211382	0.0073694	0.0117233		INX-5	0.0166436	0.0239334	0.00707547	0.520597		INX-5	0.0207407	0.000268595	0.00327434	0.571194		INX-5	0.0245614	0.0128378	0.0306358	0.124621		INX-5	0.0277411	0.0423729	0.0124138	0.116531
KVS-5	0.00049813	0.00365854	0.0016791	0.00096131		KVS-5	0	0	0.00566038	0.920237		KVS-5	0.00103704	0.0035124	0.00438053	0.326815		KVS-5	0	0	0	0.0943077		KVS-5	0.000528402	0	0.00675862	0.72938
LET-60	0.041345	0.00650407	0.00923507	0.012544		LET-60	0.0457698	0.0509886	0.0259434	0.0962824		LET-60	0.0503704	0.00413223	0.00973451	0.806234		LET-60	0.0298246	0	0.0120424	0.785038		LET-60	0.0264201	0.0305085	0.0372414	0.21739
LIN-24	0.00398506	0.0150406	0.00550373	0.0109027		LIN-24	0.00513176	0.0114464	0.00613208	0.722173		LIN-24	0.00992593	0.0018595	0.00530973	0.418475		LIN-24	0.00561404	0.00439189	0.00366089	0.216481		LIN-24	0.00819022	0	0.00758621	0.378551
LIN-33	0.00909091	0.00772358	0.00251866	0.0145369		LIN-33	0.0119279	0.024974	0.0226415	0.0509211		LIN-33	0.0237037	0.0229339	0.0517699	0.0346964		LIN-33	0.0122807	0.0304054	0.00780347	0.253171		LIN-33	0.0211361	0.0305085	0.0641379	0.0446445
LRON-7	0.150685	0.020935	0.0538246	0.135991		LRON-7	0.0208044	0.0541103	0.0353774	0.218388		LRON-7	0.0237037	0.000764463	0	0.0815829		LRON-7	0.00385965	0.00121622	0.00240848	0.0647389		LRON-7	0.00660502	0.0610169	0.00827586	0.165739
LRP-1	0.00859278	0.00304878	0.00093284	0.007034		LRP-1	0.00194175	0.00218522	0.000896226	0.187278		LRP-1	0.00148148	0.000227273	0.000663717	0.108904		LRP-1	0.000964912	0.000743243	0.00192678	0.140643		LRP-1	0.000660502	0.0101695	0.000551724	0.756784
MANS-1	0.0318804	0.00386179	0.00149254	0.0024619		MANS-1	0.0037448	0.00104058	0.0040566	0.459753		MANS-1	0	0.000413223	0	0.3107		MANS-1	0	0.000709459	0.00144509	0.337686		MANS-1	0.00409511	0	0.00282759	0.423246
MCT-3	0.125778	0.048374	0.0617537	0.0495897		MCT-3	0.112344	0.131113	0.115566	0.0824302		MCT-3	0.0607407	0.0229339	0.0628319	0.396365		MCT-3	0.0798246	0.0844595	0.0793834	0.670293		MCT-3	0.130779	0.079661	0.0634483	0.502625
MRP-1	0.00108344	0.00077236	0.00186567	0.00820633		MRP-1	0.0038835	0.00343392	0.00301887	0.833186		MRP-1	0.00266667	0.00165289	0.000840708	0.578457		MRP-1	0.000964912	0.00226351	0.00134875	0.519538		MRP-1	0.00581242	0.00322034	0.00124138	0.85826
MSP-32	0.00036115	0.00063008	4.6642e-05	0.00010551		MSP-32	0.00194175	0.00176899	4.71698e-05	0.12778		MSP-32	0	0	0	0.130167		MSP-32	0.00114035	0	0.000183044	0.662791		MSP-32	0.00303831	0.000847458	0	0.248805
PERM-5	0.00017435	0.00046748	0.00034515	0.00103165		PERM-5	0	0.00145682	0	0.968694		PERM-5	0	0	0	0.0700145		PERM-5	0	0	0.000587669	0.311076		PERM-5	0.00277411	0	0	0.623778
PEZO-1	0.0141968	0.00158537	0.00438433	0.0045721		PEZO-1	0.00235784	0.0114464	0.0108491	0.639624		PEZO-1	0.00177778	0.000971074	0.00181416	0.213126		PEZO-1	0.000263158	0.00121622	0.00105973	0.163611		PEZO-1	0.00317041	0.0020339	0.00675862	0.554732
PGP-2	0.00871731	0.00164634	0.0127799	0.00504103		PGP-2	0.00277393	0.00395421	0.00216981	0.214089		PGP-2	0.000888889	0.000247934	0.00039823	0.069607		PGP-2	0.00342105	0	0.000558767	0.112051		PGP-2	0.00211361	0.000338983	0.00117241	0.0972821
PGP-6	0.114944	0.0300813	0.0451493	0.0392731		PGP-6	0.0277393	0.0447451	0.0698113	0.709511		PGP-6	0	0	0	0.0549286		PGP-6	0.0022807	0.00027027	0.00134875	0.0589143		PGP-6	0.00250991	0.00237288	0.00131034	0.0613559
PHO-5	0.0140722	0.00630081	0.00625	0.00128957		PHO-5	0.00152566	0.00218522	0.00188679	0.163167		PHO-5	0.000592593	6.19835e-05	0	0.0830985		PHO-5	0.000526316	0	0	0.0816402		PHO-5	0.001321	0.00101695	0.000827586	0.116715
PKC-2	0.0288917	0.00191057	0.00242537	0.00445487		PKC-2	0.00471567	0.0208117	0.0193396	0.558034		PKC-2	0.0207407	0.0018595	0.00309735	0.929908		PKC-2	0.0131579	0.0027027	0.00144509	0.678635		PKC-2	0.00501982	0.0271186	0.022069	0.405423
PMP-5	0.291407	0.0544715	0.110075	0.157093		PMP-5	0.101248	0.0593132	0.160849	0.508066		PMP-5	0.00177778	0	0.00575221	0.0533519		PMP-5	0.0245614	0.00675676	0.0022158	0.0645503		PMP-5	0.0224571	0.00830508	0.00351724	0.0646217
PPK-1	0.00103362	0.0310976	0.00091418	0.0021102		PPK-1	0.00263523	0.00426639	0.00754717	0.673561		PPK-1	0.00488889	0.00113636	0.00349558	0.553735		PPK-1	0	0	0	0.363993		PPK-1	0.011889	0.00389831	0.00365517	0.809688
R07E3.1	0.0554172	0.0111789	0.0270522	0.010551		R07E3.1	0	0.0166493	0.029717	0.493915		R07E3.1	0.00148148	0	0	0.095098		R07E3.1	0	0	0	0.0902853		R07E3.1	0	0	0.000689655	0.0924601
R12C12.9	0.001868	0.0136179	0.0150187	0.0066823		R12C12.9	0	0.037461	0.0367925	0.21815		R12C12.9	0	0.00268595	0.000707965	0.0783828		R12C12.9	0	0.00324324	0.00298651	0.111465		R12C12.9	0	0.00779661	0.0151724	0.76358
R144.6	0.0160648	0.00162602	0.00419776	0.0117233		R144.6	0	0	0	0.0863496		R144.6	0	0	0	0.0863496		R144.6	0.00210526	0.00206081	0	0.138827		R144.6	0	0.00661017	0	0.213751
SCO-1	0.00022416	0.00569106	0.00195896	0.188746		SCO-1	0.00332871	0	0.00367925	0.434124		SCO-1	0.00444444	0.000413223	0	0.427604		SCO-1	0.00394737	0	0	0.42484		SCO-1	0.00739762	0.00186441	0	0.44125
SID-5	0.234122	0.0686992	0.0861008	0.0209848		SID-5	0.0037448	0.0405827	0.029717	0.217638		SID-5	0	0.0221074	0	0.142954		SID-5	0	0.0192568	0.0484586	0.21072		SID-5	0.00686922	0.020339	0.0310345	0.189544
SKAT-1	0.0311333	0.00345528	0.0206157	0.0144197		SKAT-1	0.0208044	0.0208117	0.00141509	0.740007		SKAT-1	0	0.00144628	0	0.0568014		SKAT-1	0.00561404	0.00506757	0.00520231	0.137384		SKAT-1	0.0103038	0.00830508	0	0.187542
SPH-1	0.0143213	0.00075203	0.025	0.00480657		SPH-1	0.0152566	0.00842872	0.0165094	0.759237		SPH-1	0.00577778	0.00165289	0.00376106	0.299283		SPH-1	0	0.00337838	0.00423892	0.238215		SPH-1	0.00383091	0.00559322	0.0137931	0.634823
SRC-1	0.00684932	0.00150407	0.00054104	9.3787e-05		SRC-1	0	0.00530697	0.00245283	0.885941		SRC-1	0.00207407	0.000568182	0	0.508386		SRC-1	0.00464912	0	0.00105973	0.881358		SRC-1	0	0	0.00434483	0.732547
SRR-4	0.00734745	0.0121951	0.0132463	0.00574443		SRR-4	0.0074896	0.00416233	0.00273585	0.106398		SRR-4	0	0.000588843	0.0110619	0.18104		SRR-4	0	0.00608108	0.0302505	0.770015		SRR-4	0.00845443	0.00305085	0	0.110177
STR-176	0.00199253	0.00365854	0.00016791	0.00726846		STR-176	0.00235784	0	0	0.248698		STR-176	0	0	0	0.126736		STR-176	0	0.000135135	0.00202312	0.230341		STR-176	0.00303831	0	0	0.305214
T01G5.1	0.00784558	0.00123984	0.00373134	0.00109027		T01G5.1	0.00249653	0.00343392	0.00283019	0.779131		T01G5.1	0	0	0.00141593	0.176016		T01G5.1	0.00964912	0.00777027	0.0154143	0.0386249		T01G5.1	0.000924703	0	0.00896552	0.954865
T01H3.3	0.0009589	0.00111789	0.00121269	0.00076202		T01H3.3	0	0.00489074	0.00273585	0.25496		T01H3.3	0.00414815	0.00216942	0.00575221	0.0184051		T01H3.3	0.00210526	0.00141892	0.000375723	0.539852		T01H3.3	0.00634082	0.0020339	0.0144828	0.0830116
TAG-196	0.0246575	0.00650407	0.0146455	0.0042204		TAG-196	0.00277393	0	0.0193396	0.521232		TAG-196	0	0.00258264	0.00380531	0.12068		TAG-196	0.0254386	0.022973	0.00809249	0.414109		TAG-196	0.00343461	0.00389831	0.0213793	0.706965
TAG-340	0.0371108	0.00487805	0.00895522	0.00164127		TAG-340	0.00610264	0.0114464	0.0113208	0.732044		TAG-340	0.00103704	0.000743802	0.00106195	0.260461		TAG-340	0.00140351	0.00158784	0.000250482	0.265305		TAG-340	0.00515192	0.00355932	0.00689655	0.447863
TAT-1	0.00622665	0.00345528	0.00531716	0.00234467		TAT-1	0.00180305	0.0520291	0.0141509	0.208179		TAT-1	0.0111111	0.0018595	0.00181416	0.840139		TAT-1	0.00175439	0.00172297	0.00202312	0.0617574		TAT-1	0.00171731	0.00169492	0.00827586	0.842855
VHA-6	0.0475716	0.00731707	0.0143657	0.0153576		VHA-6	0.00249653	0.0187305	0.0353774	0.870058		VHA-6	0.00177778	0	0	0.111262		VHA-6	0.00877193	3.37838e-05	0	0.155805		VHA-6	0	0	0.000965517	0.107489
VHA-7	0.0165629	0.0097561	0.0107276	0.0101993		VHA-7	0.00457698	0.00957336	0.00754717	0.0969278		VHA-7	0.0131852	0.000619835	0.00168142	0.145545		VHA-7	0.0122807	0.0209459	0.0213873	0.0955643		VHA-7	0.00607662	0.00101695	0.00965517	0.0783686
Y39B6A.1	0.0542964	0.0611789	0.0199627	0.0377491		Y39B6A.1	0.178918	0.112383	0.05	0.085741		Y39B6A.1	0.355556	0	0.0292035	0.416556		Y39B6A.1	0.132456	0.00709459	0	0.935079		Y39B6A.1	0.122853	0.0474576	0	0.689809
Y41D4A.4	0.0158157	0.00069106	0.00223881	0.00053927		Y41D4A.4	0.0131761	0.00457856	0.0113208	0.363801		Y41D4A.4	0.00444444	0.00123967	0.00486726	0.781921		Y41D4A.4	0.00508772	0.00192568	0	0.607365		Y41D4A.4	0	0.000338983	0.00827586	0.707812
Y43F4B.7	0.0210461	0.00097561	0.00914179	0.00199297		Y43F4B.7	0.00110957	0.000416233	0.00108491	0.233383		Y43F4B.7	0	0.000206612	0	0.193327		Y43F4B.7	0	0.000844595	0.01079	0.50808		Y43F4B.7	0.000660502	0	0	0.200506
Y48G10A.3	0.00684932	0.0115854	0.020709	0.0282532		Y48G10A.3	0.0346741	0.0645161	0.0240566	0.0909427		Y48G10A.3	0.0325926	0.00123967	0.00752212	0.767105		Y48G10A.3	0.00298246	0.00118243	0.00549133	0.0634575		Y48G10A.3	0.0449141	0.0423729	0.00896552	0.232306
Y51A2D.18	0.001868	0.00176829	0.00214552	0.00820633		Y51A2D.18	0	0.000936524	0.00141509	0.211021		Y51A2D.18	0	0	0	0.118822		Y51A2D.18	0.00666667	0.00277027	0.00578035	0.487952		Y51A2D.18	0	0	0.00144828	0.174077
Y51F10.11	0.00224159	0.00036585	0.00036381	0.00113716		Y51F10.11	0	0.000832466	0.000283019	0.297435		Y51F10.11	0.000444444	0	0	0.164281		Y51F10.11	0	0	0	0.107889		Y51F10.11	0	0.000847458	0	0.252561
Y57G11C.33	0.0272727	0.00119919	0.00429104	0.00609613		Y57G11C.33	0.00582524	0.024974	0.0292453	0.316444		Y57G11C.33	0	0	0	0.225413		Y57G11C.33	0	0.00135135	0.000684008	0.25527		Y57G11C.33	0	0	0	0.225413
Y63D3A.8	0.0123288	0.0050813	0.0114739	0.0038687		Y63D3A.8	0.00471567	0.0332986	0.0226415	0.166469		Y63D3A.8	0.00844444	0.00216942	0.020354	0.695436		Y63D3A.8	0	0.00878378	0.00761079	0.465075		Y63D3A.8	0.010568	0.0059322	0.0455172	0.298441
Y73F4A.1	0.0799502	0.0382114	0.029944	0.0194607		Y73F4A.1	0	0.0074922	0.0117925	0.0767259		Y73F4A.1	0	0	0	0.0442772		Y73F4A.1	0	0	0.00298651	0.0480056		Y73F4A.1	0	0	0	0.0442772
Y92H12BR.3	0.5467	0.296748	0.172575	0.173505		Y92H12BR.3	0.188627	0.189386	0.189623	0.346836		Y92H12BR.3	0.10963	0.0355372	0.0486726	0.0793855		Y92H12BR.3	0.12193	0.0898649	0.0820809	0.115185		Y92H12BR.3	0.155878	0.205085	0.162759	0.294882
ZIG-1	0.00174346	0.0115854	0.011847	0.0098476		ZIG-1	0.0319001	0.10718	0.0320755	0.0713051		ZIG-1	0.0785185	0.0355372	0.0579646	0.00630804		ZIG-1	0.0377193	0.00300676	0.00761079	0.475139		ZIG-1	0.0396301	0.0949153	0.0696552	0.00742043
ZK822.5	0.001868	0.0128049	0.00335821	0.00104338		ZK822.5	0	0	0	0.198686		ZK822.5	0	0	0	0.198686		ZK822.5	0	0	0.00154143	0.247205		ZK822.5	0	0	0	0.198686
B0416.5	0.0676214	0.0593496	0.0219216	0.0286049		B0416.5	0.166436	0.151925	0.193868	0.000660884		B0416.5	0.0622222	0.027376	0.0415929	0.969005		B0416.5	0.0342105	0.0378378	0.0492293	0.786762		B0416.5	0.165125	0.142373	0.0772414	0.022482
F54D1.6	0.00485679	0.00012195	0.00205224	0.0028136		F54D1.6	0.00721221	0.00655567	0.00801887	0.0107046		F54D1.6	0.00296296	0.000206612	0.00309735	0.80113		F54D1.6	0.00122807	0.000608108	0.000260116	0.196276		F54D1.6	0.015852	0.00576271	0.00455172	0.108862
FPN-1.1	0.00336239	0.0097561	0.0139925	0.0111372		FPN-1.1	0.0249653	0.0405827	0.0448113	0.00501182		FPN-1.1	0.0162963	0.00103306	0.00575221	0.702482		FPN-1.1	0.00877193	0.00608108	0.00366089	0.299658		FPN-1.1	0.0184941	0.020339	0.0324138	0.0256489
ITX-1	0.0383562	0.0105691	0.0170709	0.0271981		ITX-1	0.0693481	0.0801249	0.054717	0.00520034		ITX-1	0.0281481	0.00671488	0.0159292	0.504824		ITX-1	0.00964912	0.00945946	0.00578035	0.0937989		ITX-1	0.0898283	0.0559322	0.0427586	0.0348181
LEC-6	1.66874	1.16057	0.88153	2.07386		LEC-6	2.63523	2.55983	2.74528	0.0127917		LEC-6	2.88889	0.680785	1.17257	0.842217		LEC-6	0.991228	1.0473	0.78131	0.175618		LEC-6	1.77015	2.0339	2.77241	0.122502
MCT-4	0.117933	0.0396341	0.0473881	0.0548652		MCT-4	0.195562	0.41103	0.199528	0.0233802		MCT-4	0.165926	0.0188017	0.0654867	0.679213		MCT-4	0.107018	0.0432432	0.0447013	0.999109		MCT-4	0.0832232	0.191525	0.189655	0.0580722
NLP-36	0.374844	0.164431	0.150187	0.133646		NLP-36	0.714286	0.894901	1.00472	0.0010325		NLP-36	0.431111	0.154959	0.137611	0.747208		NLP-36	0.187719	0.139527	0.0864162	0.385478		NLP-36	0	0.698305	0.605517	0.293641
PLC-4	0.00435866	0.00034553	0.00066231	0.0021102		PLC-4	0.00638003	0.00509886	0.00410377	0.040873		PLC-4	0.00118519	0.0535124	0.00115044	0.304402		PLC-4	0.000526316	0	0.00231214	0.486842		PLC-4	0.00515192	0.00237288	0.00193103	0.392678
PLD-1	0.00211706	0.00152439	0.00149254	0.00099648		PLD-1	0.0038835	0.0074922	0.0136792	0.0366158		PLD-1	0.00414815	0.00144628	0.00300885	0.118462		PLD-1	0.00219298	0.00114865	0.00183044	0.629768		PLD-1	0.00475561	0.00627119	0.00137931	0.0898092
PTC-1	0.00174346	0.0004065	0.00036381	0.00075029		PTC-1	0.00194175	0.00156087	0.00235849	0.044291		PTC-1	0.00133333	0.00018595	0	0.574465		PTC-1	0.00131579	0.000472973	0.000134875	0.730721		PTC-1	0.0015852	0.00152542	0.00324138	0.0840102
SAC-1	0.00094645	0.00186992	0.00270522	0.00199297		SAC-1	0.0122053	0.00874089	0.00518868	0.0113		SAC-1	0.00237037	0.000320248	0.00110619	0.393912		SAC-1	0.00578947	0.000810811	0.000818882	0.699149		SAC-1	0.0184941	0.00423729	0.00262069	0.181927
T08G11.1	0.0428393	0.0174797	0.0159515	0.0199297		T08G11.1	0.0610264	0.0593132	0.0372642	0.0340031		T08G11.1	0.0548148	0.0116736	0.0185841	0.761876		T08G11.1	0.0307018	0.0135135	0.0127168	0.595017		T08G11.1	0.0594452	0.0525424	0.0268966	0.10276
T10B11.2	0.00660025	0.00386179	0.00382463	0.0202814		T10B11.2	0.0402219	0.0364204	0.0339623	0.00220874		T10B11.2	0.00266667	0.00299587	0.00185841	0.245389		T10B11.2	0.0114035	0.00263514	0.00645472	0.737809		T10B11.2	0.0501982	0.040678	0.0103448	0.0728526
TTR-5	0.0466999	0.0319106	0.0155784	0.0268464		TTR-5	0.126214	0.100937	0.0853774	0.00200455		TTR-5	0.00533333	0.00847107	0.0893805	0.87125		TTR-5	0.00412281	0.0905405	0.0598266	0.388509		TTR-5	0.211361	0.142373	0.101379	0.00735428
VHA-16	0.086924	0.120935	0.11847	0.0890973		VHA-16	0.140083	0.174818	0.180189	0.00984706		VHA-16	0.100741	0.0389463	0.0482301	0.0871598		VHA-16	0.0912281	0.0881757	0.0788054	0.176141		VHA-16	0.117569	0.189831	0.188966	0.0426042
INX-13	0.0384807	0.0146342	0.0203358	0.0203986		INX-13	0.0332871	0.0915713	0.0278302	0.19077		INX-13	0.0859259	0.00485537	0.0331858	0.429752		INX-13	0.0903509	0.0675676	0.0592486	0.00432647		INX-13	0.0660502	0.0305085	0.0565517	0.0510758
RHR-1	0.0575343	0.0117886	0.0349813	0.045721		RHR-1	0.0513176	0.28616	0.104245	0.129974		RHR-1	0.238519	0.0376033	0.0867257	0.168713		RHR-1	0.148246	0.0969595	0.121387	0.00408088		RHR-1	0.17041	0.0661017	0.266897	0.0474733
SNF-3	0.0194272	0.0166667	0.00951493	0.0111372		SNF-3	0.0443828	0.0530697	0.00518868	0.173519		SNF-3	0.0311111	0.00495868	0.0141593	0.728882		SNF-3	0.0394737	0.0266892	0.0251445	0.0179373		SNF-3	0.0594452	0.0661017	0.02	0.0388806
INX-16	0.0941469	0.025813	0.0254664	0.269637		INX-16	0.245492	0.475546	0.188208	0.103376		INX-16	0.277037	0.0229339	0.0818584	0.811788		INX-16	0.118421	0.0415541	0.0367052	0.616768		INX-16	0.350066	0.440678	0.237931	0.0359247
LET-805	0.0175591	0.00853659	0.00485075	0.00586166		LET-805	0.0133148	0.00957336	0.0174528	0.327845		LET-805	0.0725926	0.00568182	0.0154867	0.270073		LET-805	0.0622807	0.00439189	0.00751445	0.379		LET-805	0.0277411	0.0254237	0.0386207	0.00681281
MRP-2	0.00108344	0.00115854	0.00093284	0.000551		MRP-2	0.00291262	0.00718002	0.000849057	0.143786		MRP-2	0.00251852	0.00154959	0.00442478	0.0469954		MRP-2	0.00482456	0.000912162	0.000915222	0.296033		MRP-2	0.00369881	0.00576271	0.00593103	0.00107736
SPIN-4	0.00510585	0.00203252	0.00382463	0.0056272		SPIN-4	0.00832178	0.00863684	0.00471698	0.0816883		SPIN-4	0	0	0.00438053	0.142594		SPIN-4	0.00236842	0.00472973	0.000722543	0.307923		SPIN-4	0.00898283	0.00694915	0.0062069	0.040178
T01C8.2	0.108095	0.0754065	0.0951493	0.073388		T01C8.2	0.171983	0.280957	0.10283	0.0804539		T01C8.2	0.10963	0.0383264	0.0716814	0.48925		T01C8.2	0.130702	0.255405	0.251445	0.0173696		T01C8.2	0.32893	0.332203	0.354483	4.47927e-06
AQP-1	0.0191781	0.0288618	0.0175373	0.0177022		AQP-1	0.0180305	0.0364204	0.0372642	0.173644		AQP-1	0.0125926	0.00671488	0.0190265	0.125123		AQP-1	0	0.0125	0.00568401	0.0202933		AQP-1	0.0660502	0.0559322	0.0524138	0.000503141
INX-17	0.0196762	0.00853659	0.010541	0.0116061		INX-17	0.0499307	0.0915713	0.0226415	0.056144		INX-17	0.0077037	0.00227273	0.0119469	0.215228		INX-17	0.00324561	0.00439189	0.00549133	0.0384825		INX-17	0.0805812	0.0711864	0.0572414	0.000288289
Y58A7A.1	0.0356164	0.047561	0.0433769	0.0181712		Y58A7A.1	0.0180305	0.0208117	0.0150943	0.0670587		Y58A7A.1	0.0192593	0	0.00345133	0.0259998		Y58A7A.1	0.0763158	0.0652027	0.0763969	0.00703274		Y58A7A.1	0.0211361	0.0237288	0.0103448	0.0882762
PBO-4	0.00361146	0.00154472	0.00307836	0.00072685		PBO-4	0.00527046	0.00801249	0.00566038	0.0123934		PBO-4	0	0	0.00172566	0.131904		PBO-4	0	0	0	0.0365058		PBO-4	0.00792602	0.00881356	0.0151724	0.00969544
INX-15	0.0464508	0.0428862	0.0277985	0.0616647		INX-15	0.127601	0.0936524	0.124528	0.0022092		INX-15	0.0192593	0.00650826	0.0247788	0.0312763		INX-15	0.022807	0.0182432	0.00346821	0.026197		INX-15	0.297226	0.350847	0.0937931	0.027827
ABTS-1	0.0119552	0.00487805	0.00830224	0.010551		ABTS-1	0.038835	0.0613944	0.0466981	0.000995077		ABTS-1	0.0651852	0.015186	0.0230088	0.109137		ABTS-1	0.0184211	0.0097973	0.00481696	0.605346		ABTS-1	0.0501982	0.0627119	0.04	0.000773945
C15H9.9	0.250311	0.154878	0.173507	0.637749		C15H9.9	0.981969	0.905307	0.966981	0.00494731		C15H9.9	0.451852	0.0893595	0.384513	0.979221		C15H9.9	0.441228	0.253378	0.172447	0.923503		C15H9.9	1.03435	0.962712	1.06207	0.00330571
COL-92	0.00448319	0.00063008	0.00036381	0.00199297		COL-92	0.0102635	0.00770031	0.00801887	0.00342819		COL-92	0.00266667	0.000733471	0	0.596163		COL-92	0.0280702	0.00777027	0.0191715	0.0222538		COL-92	0.0116248	0.00661017	0.00827586	0.00855765
COL-93	0.00448319	0.00063008	0.00036381	0.00199297		COL-93	0.0102635	0.00770031	0.00801887	0.00342819		COL-93	0.00266667	0.000733471	0	0.596163		COL-93	0.0280702	0.00777027	0.0191715	0.0222538		COL-93	0.0116248	0.00661017	0.00827586	0.00855765
COL-94	0.00448319	0.00063008	0.00036381	0.00199297		COL-94	0.0102635	0.00770031	0.00801887	0.00342819		COL-94	0.00266667	0.000733471	0	0.596163		COL-94	0.0280702	0.00777027	0.0191715	0.0222538		COL-94	0.0116248	0.00661017	0.00827586	0.00855765
EAT-6	2.01743	1.54472	1.02985	1.82649		EAT-6	3.64771	4.76587	3.15566	0.00504335		EAT-6	3.21481	0.548554	1.26106	0.925472		EAT-6	1.80702	1.03378	0.740848	0.315037		EAT-6	3.79128	4.0678	3.37931	0.000894369
EGL-30	0.0521793	0.0528455	0.0310634	0.0622509		EGL-30	0.0846047	0.10718	0.0872642	0.00685242		EGL-30	0.077037	0.0271694	0.0477876	0.943117		EGL-30	0.0824561	0.025	0.0166667	0.683306		EGL-30	0.0924703	0.108475	0.0772414	0.0105611
F20D1.3	0.0496887	0.027439	0.017444	0.0327081		F20D1.3	0.105409	0.16129	0.128302	0.00143809		F20D1.3	0.137778	0.0397727	0.0792035	0.0853007		F20D1.3	0.110526	0.0692568	0.0453757	0.059561		F20D1.3	0.129458	0.161017	0.169655	0.000232903
F42G10.1	0.00064757	0.00199187	0.00652985	0.00094959		F42G10.1	0.0126214	0.0187305	0.0117925	0.00464691		F42G10.1	0.0311111	0.00764463	0.00367257	0.174579		F42G10.1	0.0131579	0.00141892	5.78035e-05	0.567097		F42G10.1	0.0104359	0.0169492	0.0144828	0.00394792
GOA-1	0.141968	0.200813	0.0896455	0.121923		GOA-1	0.270458	0.379813	0.248585	0.0143433		GOA-1	0.453333	0.0732438	0.163274	0.402165		GOA-1	0.175439	0.0631757	0.0480732	0.368336		GOA-1	0.35535	0.5	0.313103	0.00597005
GPB-1	0.372354	0.294715	0.133396	0.287222		GPB-1	0.729542	0.605619	0.59434	0.00306599		GPB-1	0.881481	0.172521	0.435841	0.274033		GPB-1	0.37807	0.228041	0.181118	0.906839		GPB-1	0.812417	0.877966	0.917241	0.000246494
INX-9	0.00161893	0.00083333	0.00205224	0.00128957		INX-9	0.00721221	0.0145682	0.0141509	0.00342487		INX-9	0.012	0.00216942	0.00429204	0.120543		INX-9	0.00289474	0.00439189	0.00645472	0.0188334		INX-9	0.0122853	0.0116949	0.0137931	8.68923e-06
KCC-2	0.00547945	0.00447154	0.00382463	0.00199297		KCC-2	0.0138696	0.00884495	0.00660377	0.032962		KCC-2	0.0162963	0.00681818	0.00261062	0.242383		KCC-2	0.00640351	6.75676e-05	0.00202312	0.562405		KCC-2	0.0198151	0.0159322	0.0117241	0.00259776
LEC-12	0.0336239	0.0247967	0.0125	0.0323564		LEC-12	0.0970874	0.0676379	0.0787736	0.00181772		LEC-12	0.0207407	0.0365702	0.0451327	0.360919		LEC-12	0.0298246	0.0165541	0.022447	0.679903		LEC-12	0.124174	0.0813559	0.102759	0.00128111
LEC-4	0.457036	0.398374	0.209888	0.270809		LEC-4	0.993065	1.11342	1.10377	0.000181591		LEC-4	1.48148	0.346074	0.712389	0.135063		LEC-4	0.826316	0.537162	0.415222	0.087534		LEC-4	1.47952	1.24915	1.68966	0.000275615
MCA-3	0.1868	0.165854	0.109142	0.182884		MCA-3	0.495146	0.629553	0.457075	0.000655383		MCA-3	0.601481	0.159091	0.263274	0.174072		MCA-3	0.367544	0.160135	0.122351	0.446445		MCA-3	0.640687	0.716949	0.508276	0.000404895
MCT-6	0.100996	0.0715447	0.0624067	0.0942556		MCT-6	0.289875	0.378772	0.235377	0.0018674		MCT-6	0.157037	0.0380165	0.0575221	0.956095		MCT-6	0.0736842	0.0685811	0.0947013	0.804987		MCT-6	0.314399	0.301695	0.3	6.63514e-06
NKB-1	0.374844	0.52439	0.316231	0.538101		NKB-1	1.043	1.64412	0.919811	0.011947		NKB-1	1.16	0.235537	0.588496	0.385495		NKB-1	0.617544	0.307095	0.193642	0.62031		NKB-1	1.321	1.38983	1.15862	0.000186851
NKB-3	0.950187	0.898374	0.628731	1.19695		NKB-3	1.63662	2.07076	1.77358	0.00346234		NKB-3	1.06667	0.166322	0.415044	0.220113		NKB-3	0.877193	0.405405	0.363198	0.116202		NKB-3	1.66446	1.4339	1.53103	0.00850429
TTR-24	0.306351	0.25	0.0922575	0.154748		TTR-24	0.423024	0.545265	0.318868	0.0338611		TTR-24	0.355556	0.153926	0.292478	0.418347		TTR-24	0.337719	0.188851	0.191715	0.605004		TTR-24	0.656539	0.547458	0.531724	0.00219361
TTR-6	0.305106	0.197764	0.0522388	0.130129		TTR-6	0.468793	0.595213	0.438679	0.00707569		TTR-6	0.405926	0.0779959	0.24646	0.508844		TTR-6	0.217544	0.170946	0.128131	0.98983		TTR-6	0.597094	0.666102	0.44069	0.00535632
VHA-5	0.0633873	0.025813	0.0178172	0.00973036		VHA-5	0.0638003	0.116545	0.0858491	0.0258143		VHA-5	0.17037	0.0254132	0.0376106	0.292124		VHA-5	0.0903509	0.0564189	0.0327553	0.182505		VHA-5	0.0964333	0.0898305	0.122759	0.00633748
WRK-1	0.00784558	0.0207317	0.0149254	0.0124267		WRK-1	0.0291262	0.0291363	0.0334906	0.0045517		WRK-1	0.04	0.0127066	0.0128319	0.383319		WRK-1	0.0140351	0.00439189	0.00481696	0.191166		WRK-1	0.0317041	0.0271186	0.0282759	0.00668094
Y57A10A.26	0.105106	0.078252	0.0436567	0.0939039		Y57A10A.26	0.194175	0.224766	0.256132	0.00116171		Y57A10A.26	0.192593	0.0506198	0.147345	0.250458		Y57A10A.26	0.0350877	0.0898649	0.0766859	0.56262		Y57A10A.26	0.178336	0.164407	0.261379	0.00976438
ZIG-11	0.154421	0.0585366	0.0610075	0.181712		ZIG-11	0.316227	0.352758	0.458491	0.00392079		ZIG-11	0.361481	0.0876033	0.266814	0.166159		ZIG-11	0.22193	0.201014	0.108863	0.23985		ZIG-11	0.443857	0.428814	0.561379	0.0008675
ZIG-9	0.0515567	0.0465447	0.0274254	0.0291911		ZIG-9	0.148405	0.162331	0.0995283	0.00248934		ZIG-9	0.037037	0.0237603	0.0442478	0.693647		ZIG-9	0.0254386	0.0574324	0.0219653	0.7659		ZIG-9	0.235139	0.191525	0.171724	0.000239074
AQP-7	0.351183	0.0656504	0.147388	0.0735053		AQP-7	0.801664	0.823101	0.464151	0.00778019		AQP-7	0.835556	0.241736	0.526549	0.070398		AQP-7	0.833333	0.719595	0.513487	0.00502429		AQP-7	0.982827	0.888136	0.696552	0.00120609
FGT-1	0.201743	0.151626	0.110075	0.198124		FGT-1	0.402219	0.50052	0.340566	0.00309494		FGT-1	0.514074	0.241736	0.473451	0.0229971		FGT-1	0.260526	0.143581	0.0672447	0.88328		FGT-1	0.459709	0.608475	0.686207	0.0010128
F40A3.2	0.0124533	0.00069106	0.00914179	0.00855803		F40A3.2	0	0	0	0.0473856		F40A3.2	0	0	0	0.0473856		F40A3.2	0.0131579	0	0.00134875	0.557177		F40A3.2	0	0	0	0.0473856
GPA-8	0.00386052	0.0101626	0.0056903	0.00726846		GPA-8	0.0180305	0.0228928	0	0.305047		GPA-8	0	0	0	0.00793579		GPA-8	0	0	0	0.00793579		GPA-8	0.0224571	0.020339	0.0406897	0.0133706
SCAV-3	0.0782067	0.0800813	0.0440299	0.0322392		SCAV-3	0.0221914	0.0218522	0.0245283	0.0545559		SCAV-3	0.0106667	0.00733471	0.0119469	0.0194331		SCAV-3	0.0192982	0.0266892	0.0256262	0.060917		SCAV-3	0.0264201	0.0186441	0.0296552	0.0683253
LEC-8	0.0912827	0.0880081	0.117537	0.177022		LEC-8	0	0.190427	0.265566	0.654259		LEC-8	0.24	0.0157025	0.0460177	0.789897		LEC-8	0.0412281	0	0.0260116	0.0148914		LEC-8	0.0277411	0.0220339	0.0965517	0.0782807
MRPL-13	0.00560399	0.00386179	0.00326493	0.00058617		MRPL-13	0.00180305	0	0.00264151	0.242033		MRPL-13	0.00311111	0	0.000221239	0.196531		MRPL-13	0	0	0	0.0425443		MRPL-13	0.00660502	0.00220339	0	0.854655
PBO-1	0.0496887	0.0107724	0.0276119	0.0484173		PBO-1	0	0.0405827	0.0179245	0.366708		PBO-1	0.0148148	0.00258264	0.00349558	0.0640854		PBO-1	0	0	0	0.0266603		PBO-1	0.01321	0.0140678	0.02	0.159847
PTR-21	0.017061	0.00365854	0.00970149	0.0146542		PTR-21	0.0124827	0.0228928	0.00801887	0.557481		PTR-21	0.00444444	0.00165289	0.00176991	0.0608977		PTR-21	0.00166667	0.00125	0.000337187	0.0341146		PTR-21	0.00990753	0.0144068	0.00689655	0.835416
Y37D8A.2	0.489415	0.323171	0.206157	0.214537		Y37D8A.2	0.158114	0.331946	0.306604	0.655731		Y37D8A.2	0.106667	0.0254132	0.0345133	0.0262065		Y37D8A.2	0.100877	0.0844595	0.0710019	0.0361416		Y37D8A.2	0.178336	0.198305	0.185517	0.182787
Y82E9BR.16	0.0474471	0.0276423	0.0222948	0.0485346		Y82E9BR.16	0.0499307	0.0509886	0.0518868	0.130101		Y82E9BR.16	0.0266667	0.00764463	0.00415929	0.0622445		Y82E9BR.16	0.0149123	0.0179054	0.011368	0.0440354		Y82E9BR.16	0.0647292	0.0491525	0.0544828	0.0770124
T12B3.2	0.00909091	0.0105691	0.00774254	0.003517		T12B3.2	0	0.0037461	0	0.0262901		T12B3.2	0	0	0	0.00769456		T12B3.2	0.0105263	0.00317568	0.0066474	0.723211		T12B3.2	0.00475561	0.00440678	0	0.0875604
AAT-1	0.00075965	0.00060976	0.00121269	0.00062134		AAT-1	0.00235784	0	0.000235849	0.925645		AAT-1	0	0.00018595	0	0.00834929		AAT-1	0	0	0	0.0049463		AAT-1	0.00250991	0.00186441	0.000758621	0.104421
ASP-4	0.37858	0.369919	0.154851	0.233294		ASP-4	0.234397	0.234131	0.262264	0.55936		ASP-4	0.165926	0.0475207	0.0654867	0.0439842		ASP-4	0.119298	0.0939189	0.083815	0.0359413		ASP-4	0.265522	0.179661	0.177241	0.316036
C03A3.2	0.0622665	0.029065	0.0388993	0.0248535		C03A3.2	0.0568655	0.0426639	0.0533019	0.299626		C03A3.2	0	0.00144628	0	0.011824		C03A3.2	0	0	0	0.0112207		C03A3.2	0.0211361	0.00949153	0	0.0504357
C06H5.6	0.0371108	0.0272358	0.0237873	0.0445487		C06H5.6	0.0429958	0.0426639	0.0504717	0.0970148		C06H5.6	0.0100741	0.000878099	0.00442478	0.00556289		C06H5.6	0.00631579	0.00293919	0.00250482	0.00362753		C06H5.6	0.0422721	0.0254237	0.0434483	0.623499
C29H12.2	0.0141968	0.0223577	0.0375	0.0111372		C29H12.2	0.0194175	0.0239334	0.0419811	0.465634		C29H12.2	0	0.00464876	0	0.038779		C29H12.2	0	0.00439189	0.00491329	0.0504319		C29H12.2	0.0128137	0.0079661	0.0255172	0.50826
CPZ-2	0.358655	0.186585	0.171642	0.111372		CPZ-2	0.214979	0.212279	0.174057	0.921295		CPZ-2	0	0.00144628	0.00163717	0.0219443		CPZ-2	0	0	0.00115607	0.0216971		CPZ-2	0.110964	0.0288136	0.00358621	0.0673639
F09B12.3	0.809465	0.384146	0.349813	0.282532		F09B12.3	0.341193	0.567118	0.608491	0.76789		F09B12.3	0.0444444	0.027686	0.0181416	0.0296992		F09B12.3	0.0105263	0.00540541	0.0137765	0.025175		F09B12.3	0.15852	0.0661017	0.144828	0.0677709
F09G8.7	0.0575343	0.0611789	0.0692164	0.0208675		F09G8.7	0.0596394	0.0166493	0	0.229111		F09G8.7	0	0.00857438	0	0.012362		F09G8.7	0.00736842	0	0.0083815	0.0148288		F09G8.7	0.0462351	0	0	0.0976864
F17C11.12	0.00273973	0.00691057	0.00858209	0.0049238		F17C11.12	0.00721221	0.00832466	0.0108491	0.145237		F17C11.12	0.00281481	0	0	0.0347607		F17C11.12	0.00280702	0.00209459	8.67052e-05	0.0535474		F17C11.12	0.00766182	0.00525424	0.00117241	0.637004
F41C3.5	1.92528	1.51423	0.820896	0.864009		F41C3.5	1.17337	1.41519	1.0283	0.827961		F41C3.5	0.448889	0.0916322	0.140265	0.0239928		F41C3.5	0.47193	0.241892	0.320809	0.0330931		F41C3.5	0.811096	0.6	0.626207	0.119311
F52H2.6	0.0191781	0.00406504	0.016791	0.0180539		F52H2.6	0.00721221	0.0218522	0.00707547	0.689552		F52H2.6	0.00711111	0.000650826	0.0010177	0.0502571		F52H2.6	0.00491228	0.000337838	0.000144509	0.0331737		F52H2.6	0.00686922	0.00881356	0.00062069	0.108046
HMT-1	0.199253	0.0918699	0.0930037	0.0736225		HMT-1	0.373093	0.0759625	0.107547	0.445033		HMT-1	0.00651852	0.0107438	0.00486726	0.0251306		HMT-1	0.0105263	0.00675676	0.0143545	0.0279869		HMT-1	0.0475561	0.367797	0.042069	0.708972
IGLR-2	0.00535492	0.00223577	0.00130597	0.00304807		IGLR-2	0.00429958	0.00926119	0.000283019	0.527906		IGLR-2	0.000296296	0.000278926	0	0.0418442		IGLR-2	0.000263158	0	0.00044316	0.0443691		IGLR-2	0.00713342	0.00627119	0.000827586	0.407235
INX-2	0.00136986	0.00091463	0.00054104	0.00076202		INX-2	0	0.00135276	0	0.347747		INX-2	0	0	0	0.00754459		INX-2	0	0	0	0.00754459		INX-2	0	0.0123729	0.0117241	0.0878153
KDIN-1	0.015193	0.00447154	0.00755597	0.0132474		KDIN-1	0.00194175	0.00541103	0.00377358	0.0900595		KDIN-1	0.00296296	0.000268595	0	0.0311295		KDIN-1	0.000175439	0.000371622	0.000655106	0.0213735		KDIN-1	0.00290621	0.00338983	0.00131034	0.0518917
LAAT-1	0.00647572	0.0215447	0.0224813	0.00973036		LAAT-1	0.0221914	0.0280957	0.0108491	0.444735		LAAT-1	0	0.0017562	0.000530973	0.0317659		LAAT-1	0	0.00148649	0.000231214	0.0302721		LAAT-1	0.014531	0.0115254	0	0.342612
MRP-5	0.0572852	0.0260163	0.0282649	0.0706917		MRP-5	0.0305132	0.0447451	0.0485849	0.768721		MRP-5	0.0222222	0.00206612	0.00619469	0.0524554		MRP-5	0.00614035	0.00182432	0.00240848	0.0233343		MRP-5	0.0184941	0.0254237	0.0213793	0.129308
NDG-4	0.00772105	0.00995935	0.011847	0.00973036		NDG-4	0.00249653	0.0135276	0.0160377	0.819042		NDG-4	0.00162963	0.0017562	0.00530973	0.00458419		NDG-4	0.00368421	0.00540541	0.0039499	0.00411163		NDG-4	0.0011889	0.00457627	0.0248276	0.953528
NRF-5	0.0447073	0.0859756	0.0628731	0.119578		NRF-5	0.0263523	0.14256	0.0301887	0.761504		NRF-5	0.0414815	0.00258264	0.00752212	0.0371686		NRF-5	0.0157895	0.00878378	0.00433526	0.016299		NRF-5	0.0330251	0.0372881	0.02	0.0573263
PHO-14	0.0383562	0.0239837	0.013153	0.0165299		PHO-14	0.00818308	0.00842872	0.0117925	0.0989587		PHO-14	0.00548148	0.000516529	0.00234513	0.0299206		PHO-14	0.00447368	0.0022973	0.0017341	0.0290741		PHO-14	0.00792602	0.00864407	0.00965517	0.0841971
PMP-3	0.00498132	0.00223577	0.00830224	0.0066823		PMP-3	0.00332871	0	0.00990566	0.708593		PMP-3	0.00192593	0.000216942	0.000442478	0.0324806		PMP-3	0	0	0	0.0152395		PMP-3	0.0010568	0.00271186	0.000413793	0.0519823
SUR-7	0.0193026	0.0050813	0.0165112	0.0128957		SUR-7	0.0126214	0.00353798	0.0221698	0.912245		SUR-7	0	0.000196281	0	0.0144494		SUR-7	0.00412281	0	0.000308285	0.0256442		SUR-7	0.01321	0	0.00827586	0.253052
T10C6.6	0.0104608	0.00406504	0.0045709	0.00750293		T10C6.6	0.0138696	0.0218522	0	0.392541		T10C6.6	0	0	0.00415929	0.0540363		T10C6.6	0	0	0	0.012633		T10C6.6	0.00964333	0.010339	0	0.997497
T19A6.1	0.0143213	0.00772358	0.0068097	0.0066823		T19A6.1	0	0.0057232	0.0160377	0.730876		T19A6.1	0	0.00402893	0.00150442	0.0313721		T19A6.1	0	0	0.00134875	0.0120775		T19A6.1	0	0.0130508	0.00289655	0.408164
T27F6.6	0.00946451	0.00853659	0.0145522	0.0134818		T27F6.6	0.00887656	0.0156087	0.0127358	0.722536		T27F6.6	0.00622222	0.00123967	0.00353982	0.0140738		T27F6.6	0.00473684	0	0.00202312	0.00684771		T27F6.6	0.0112285	0	0	0.0825961
TAT-5	0.00523039	0.00223577	0.00354478	0.00117233		TAT-5	0.00180305	0.000208117	0	0.0915642		TAT-5	0	0.00103306	8.84956e-05	0.0549326		TAT-5	0	0	0	0.0321843		TAT-5	0.00198151	0.00220339	0.000137931	0.228942
VER-3	0.0141968	0.00670732	0.00652985	0.0106682		VER-3	0.00138696	0.0069719	0.0117925	0.435745		VER-3	0.00162963	0.000640496	0.00238938	0.0152249		VER-3	0.00157895	0.00222973	0.00404624	0.0276981		VER-3	0.00184941	0.00338983	0.0124138	0.346224
Y54F10AM.8	1.2254	0.489837	0.513993	0.481829		Y54F10AM.8	0.431345	0.594173	0.570755	0.537672		Y54F10AM.8	0.148148	0.0832645	0.0429204	0.0431043		Y54F10AM.8	0.12193	0.0496622	0.0600193	0.0394585		Y54F10AM.8	0.293263	0.19322	0.297931	0.114474
ZK6.11	0.240349	0.0607724	0.146455	0.12544		ZK6.11	0.0776699	0.136316	0.509434	0.456559		ZK6.11	0.00237037	0.00258264	0.00442478	0.0243207		ZK6.11	0.0175439	0.0216216	0.00992293	0.0345517		ZK6.11	0.0237781	0.0288136	0.1	0.115341
ZC8.6	0.00510585	0.00075203	0.00429104	0.0024619		ZC8.6	0.00332871	0.00114464	0.00367925	0.756475		ZC8.6	0	0	0	0.0408099		ZC8.6	0	0	0.000655106	0.0532829		ZC8.6	0	0	0	0.0408099
CPZ-1	0.348692	0.345528	0.1875	0.255569		CPZ-1	0.0665742	0.159209	0.164623	0.0336395		CPZ-1	0.0385185	0.0382231	0.0429204	0.00314393		CPZ-1	0.12807	0.0719595	0.0950867	0.0116353		CPZ-1	0.0937913	0.201695	0.171034	0.0600736
K10C9.3	0.109838	0.0817073	0.0414179	0.0459555		K10C9.3	0.0122053	0	0.0150943	0.0264025		K10C9.3	0	0	0	0.0146643		K10C9.3	0.00666667	0.00324324	0.0237958	0.031746		K10C9.3	0.0264201	0.0237288	0.0165517	0.0565727
K11D9.3	0.00460772	0.00650407	0.00279851	0.00293083		K11D9.3	0	0	0	0.00937716		K11D9.3	0	0	0	0.00937716		K11D9.3	0	0	0	0.00937716		K11D9.3	0.00964333	0.00847458	0	0.534283
AQP-8	0.00784558	0.00609756	0.00904851	0.00410317		AQP-8	0	0.00416233	0	0.0261017		AQP-8	0	0	0	0.00314845		AQP-8	0	0	0.00472062	0.0363119		AQP-8	0	0	0	0.00314845
CLH-1	0.0300124	0.0197154	0.017444	0.0229777		CLH-1	0.010957	0.0135276	0.00471698	0.0220845		CLH-1	0.000444444	0.00154959	0.00230088	0.00133069		CLH-1	0.0307018	0.0141892	0.0323699	0.605308		CLH-1	0.011889	0.0110169	0.0151724	0.034255
GANA-1	0.0389788	0.0231707	0.0163246	0.0132474		GANA-1	0.00124827	0	0.00132075	0.0227681		GANA-1	0	0	0	0.0197211		GANA-1	0.00649123	0	0.011079	0.0665196		GANA-1	0.00422721	0	0	0.0261488
R04B3.2	0.0205479	0.0256098	0.0152052	0.0169988		R04B3.2	0	0	0	0.000794506		R04B3.2	0	0.000371901	0	0.000820925		R04B3.2	0.00192982	0.00608108	0.0175337	0.0672347		R04B3.2	0	0	0	0.000794506
Y32F6A.5	0.0377335	0.0245935	0.0280784	0.0139508		Y32F6A.5	0	0.012487	0.0117925	0.0440263		Y32F6A.5	0.0311111	0	0.00274336	0.204381		Y32F6A.5	0.000526316	0	0.00809249	0.0134194		Y32F6A.5	0	0	0	0.00644679
CUA-1	0.00884184	0.00792683	0.0191231	0.0119578		CUA-1	0.00346741	0.00811655	0.00707547	0.135181		CUA-1	0.000740741	0.00052686	0.000884956	0.0133912		CUA-1	0.000438596	0.000641892	0.00061657	0.0127005		CUA-1	0.00396301	0.00254237	0.00524138	0.0471826
HAF-2	0.0265255	0.0156504	0.0211754	0.00621336		HAF-2	0.00471567	0.0057232	0.00518868	0.0638606		HAF-2	0	0.00506198	0.000309735	0.0323671		HAF-2	0.00298246	0	0.00818882	0.055761		HAF-2	0.000660502	0	0.000275862	0.0208596
HAF-6	0.0613948	0.0416667	0.029944	0.0177022		HAF-6	0.0277393	0.0853278	0.00613208	0.931129		HAF-6	0	0	0	0.0187363		HAF-6	0	0	0	0.0187363		HAF-6	0.0113606	0	0.00144828	0.0326037
PTR-24	0.0184309	0.0164634	0.0134328	0.0237984		PTR-24	0.0112344	0.0145682	0.00990566	0.0824605		PTR-24	0	0	0	0.000922269		PTR-24	0	0	0	0.000922269		PTR-24	0.00620872	0.0116949	0.00827586	0.0239383
R09F10.1	0.0531756	0.0186992	0.0305037	0.022626		R09F10.1	0.00901526	0.0228928	0.0273585	0.311968		R09F10.1	0	0	0	0.0187157		R09F10.1	0	0	0.00022158	0.018882		R09F10.1	0	0	0.00648276	0.0260079
SLC-36.2	0.163138	0.0573171	0.0789179	0.0640094		SLC-36.2	0.0970874	0.114464	0.0566038	0.965747		SLC-36.2	0	0	0	0.0259082		SLC-36.2	0	0	0	0.0259082		SLC-36.2	0.0124174	0	0.0103448	0.0357115
UNC-32	0.22665	0.146748	0.121269	0.0954279		UNC-32	0.0402219	0.113424	0.079717	0.125599		UNC-32	0.0237037	0.0118802	0.019469	0.0122154		UNC-32	0.0394737	0.0334459	0.0422929	0.022879		UNC-32	0.0594452	0.0389831	0.0558621	0.0368053
VHA-4	0.0721046	0.0538618	0.0843284	0.0427901		VHA-4	0	0.0312175	0.0816038	0.309701		VHA-4	0	0.00330579	0.0393805	0.0233706		VHA-4	0	0.0179054	0.0130058	0.00654726		VHA-4	0	0	0.00965517	0.00313644
Y39A1A.22	0.00697385	0.00284553	0.00718284	0.0042204		Y39A1A.22	0.00138696	0.00343392	0.00377358	0.142381		Y39A1A.22	8.88889e-05	0	0.000575221	0.0101468		Y39A1A.22	0	0	0	0.00831252		Y39A1A.22	0.00211361	0.000135593	0.00158621	0.030736
AAGR-2	0.135741	0.121545	0.0656716	0.0715123		AAGR-2	0.0126214	0.0145682	0.0193396	0.010589		AAGR-2	0.0136296	0.00857438	0.0123894	0.00873649		AAGR-2	0.00964912	0.00439189	0.00895954	0.00733203		AAGR-2	0.0224571	0.0135593	0.0206897	0.0126045
APH-2	0.00348692	0.00073171	0.00195896	0.00234467		APH-2	0	0	0.000660377	0.0407217		APH-2	0	0	0	0.0248139		APH-2	0	0.000405405	0	0.0327149		APH-2	0	0.000677966	0	0.0413836
ARL-8	0.114819	0.109553	0.101679	0.068347		ARL-8	0.0679612	0	0.0485849	0.0356938		ARL-8	0	0.00702479	0	0.000590574		ARL-8	0	0.0128378	0.0255299	0.00157539		ARL-8	0.0501982	0.0542373	0.0496552	0.0125517
HAF-7	0.0160648	0.00914634	0.0103545	0.0045721		HAF-7	0.00235784	0.00104058	0.0040566	0.0476199		HAF-7	0	0	0	0.0157649		HAF-7	0.000263158	0	4.81696e-05	0.0164146		HAF-7	0.00343461	0.00254237	0	0.0404373
HEX-1	0.0337484	0.0160569	0.0219216	0.00750293		HEX-1	0	0	0	0.0288062		HEX-1	0	0.00113636	0	0.0309174		HEX-1	0	0.000709459	0.00491329	0.042832		HEX-1	0	0	0	0.0288062
M05B5.4	0.0447073	0.00995935	0.0274254	0.0283705		M05B5.4	0.000970874	0	0.0029717	0.0262484		M05B5.4	0	0	0	0.0217506		M05B5.4	0	0	0	0.0217506		M05B5.4	0	0	0	0.0217506
NRF-6	0.0160648	0.0138211	0.0182836	0.0179367		NRF-6	0.00693481	0.00520291	0.00707547	0.000586735		NRF-6	0.00192593	0	0	7.1607e-05		NRF-6	0.000701754	0	0.000915222	4.89575e-05		NRF-6	0.00409511	0.00881356	0.00344828	0.0019269
PCP-5	0.0310087	0.0247967	0.0197761	0.0179367		PCP-5	0.010957	0.0114464	0.0122642	0.0192635		PCP-5	0	0.00196281	0.00132743	0.00140841		PCP-5	0.00964912	0.00472973	0.0138728	0.0192886		PCP-5	0.010568	0.0059322	0.0124138	0.0155993
PPT-1	0.011208	0.00853659	0.00233209	0.0045721		PPT-1	0	0.000416233	0.000613208	0.043583		PPT-1	0	0	0	0.0364098		PPT-1	0	0	0	0.0364098		PPT-1	0	0	0	0.0364098
BLI-4	0.00199253	0.00010163	0.0001306	0.00049238		BLI-4	0	0	0	0.255015		BLI-4	0	0.000154959	0	0.289782		BLI-4	0	0	0	0.255015		BLI-4	0	0	0	0.255015
C18B12.4	0.00535492	0.00691057	0.00233209	0.0014068		C18B12.4	0	0	0	0.0464432		C18B12.4	0	0	0	0.0464432		C18B12.4	0	0	0	0.0464432		C18B12.4	0	0	0	0.0464432
C33G3.4	0.00547945	0.00123984	3.7313e-05	0.00075029		C33G3.4	0	0	0	0.2523		C33G3.4	0	0	0	0.2523		C33G3.4	0	0	0	0.2523		C33G3.4	0	0	0	0.2523
GLC-1	0.00032379	0.00054878	0.00021455	0.00060961		GLC-1	0	0	0	0.0119751		GLC-1	0	0	0	0.0119751		GLC-1	0	0	0	0.0119751		GLC-1	0	0	0	0.0119751
R08F11.1	0.00053549	0.00052846	0.0138993	0.0162954		R08F11.1	0	0	0	0.179448		R08F11.1	0	0	0	0.179448		R08F11.1	0	0	0	0.179448		R08F11.1	0	0	0	0.179448
T28D9.3	0.00498132	0.00345528	0.00699627	0.007034		T28D9.3	0	0	0	0.00274736		T28D9.3	0	0	0	0.00274736		T28D9.3	0	0	0	0.00274736		T28D9.3	0	0	0	0.00274736
TRE-3	0.00834371	0.0002439	0.00289179	0.00028136		TRE-3	0	0	0	0.248864		TRE-3	0	0	0	0.248864		TRE-3	0	0	0	0.248864		TRE-3	0	0	0	0.248864
TWK-21	0.00115816	0.00223577	0.00043843	0.0059789		TWK-21	0	0	0	0.153273		TWK-21	0	0	0	0.153273		TWK-21	0	0	0	0.153273		TWK-21	0	0	0	0.153273
Y15E3A.4	0.00067248	8.1301e-05	0.00130597	0.00073857		Y15E3A.4	0	0	0	0.0646307		Y15E3A.4	0	0	0	0.0646307		Y15E3A.4	0	0	0	0.0646307		Y15E3A.4	0	0	0	0.0646307
Note:
1. * The level of the target protein is normalized to the level of LMP-1 in each Lyso-IP resplicate (the same column)
2. # p-value, the level of the target protein in tissue-specific Lyso-IP is compared to that in whole-body Lyso-IP (the same row)
3. empty cells, no protein detected in three replicates of tissue-specific Lyso-IP
