# Supplementary material for: Organelle proteomic profiling reveals lysosomal heterogeneity in association with longevity
Source: eLife. 2024 Jan 19;13:e85214. doi: 10.7554/eLife.85214 (PMC10876212; doi:10.7554/eLife.85214)
Supplement: Supplementary file 5. [file elife-85214-supp5.xlsx]

## Sheet: Sheet1
Table S5 Lysosome-enriched proteins identified from LMP-1 Lyso-IP using isp-1(lf) mutant
Protein Name	Description	Subcellular location	Molecular function
AQP-2	Aquaporin-3	Plasma Membrane	Transporter/Channel
ASM-1	Sphingomyelin phosphodiesterase	Lysosome	Enzyme
ATGP-2	Neutral and basic amino acid transport protein rBAT	Unknown	Transporter/Channel
C35A5.6	worm specific	Unknown	Unknown
CHT-4	Chitotriosidase-1	Lysosome/Extracelluar	Enzyme
CLH-6	Chloride channel protein 7	Endosome (yeast)	Transporter/Channel
CLN-3.2	Isoform 1 of Battenin	Golgi/lysosome/plasma membrane/endosome	Structure
CTSA-2	lysosomal protective protein isoform a precursor	Lysosome	Signaling/Enzyme
F10G7.5	monocarboxylate transporter 12	Plasma membrane	Transporter/Channel
F11G11.5	worm specific	Unknown	Unknown
F25H2.6	Collagen type IV alpha-3-binding protein	Extracellular Matrix	Structure
F38E9.1	PI-PLC X domain-containing protein 2	Nucleus	Enzyme
F54E2.1	worm specific	Unknown	Unknown
FMO-1	Dimethylaniline monooxygenase [N-oxide-forming] 5	ER	Enzyme
FUT-8	Alpha-(1,6)-fucosyltransferase, Catalyzes the addition of fucose in alpha 1-6 linkage to the first GlcNAc residue	Golgi	Enzyme
GBA-3	Lysosomal acid glucosylceramidase	Lysosome	Enzyme
HUM-5	Isoform 1 of Myosin-Ib	Cytosol	Structure
K08D8.6	worm specifc	Unknown	worm specific
LIPL-7	Lysosomal acid lipase/cholesteryl ester hydrolase	Lysosome	Enzyme
LNKN-1	T-cell immunomodulatory protein	Secreted	Signaling
LPD-3	Transmembrane protein KIAA1109	Endosome	Trafficking
LRON-3	Trophoblast glycoprotein	Plasma Membrane	Signaling
MRP-4	Multidrug resistance-associated protein 1	Plasma membrane	Transporter/Channel
MYO-6	myosin heavy chain	Cytosol/Golgi/vesicle	Structure/traficking
NCX-3	Isoform 3 of Sodium/calcium exchanger 1	Mitochondria	Transporter/Channel
NEX-2	Isoform 2 of Annexin A7	ER/nucleus/extracellular region	Structure
PHO-1	Prostatic acid phosphatase	Lysosome/Secreted	Enzyme
R07B7.9	Phospholipase B1, membrane-associated	Plasma membrane	Enzyme
R09A1.3	worm specific	Unknown	Unknown
SPP-13	worm specific	Unknown	Unknown
T10B10.3	worm specifc	Unknown	Unknown
T19C3.5	Bactericidal permeability-increasing protein	Secreted	Signaling
Y54F10AR.1	Phosphatidylinositol transfer protein alpha isoform	Plasma Membrane	Transporter/Channel
Y57G11A.4	DOMON domain-containing protein	Cell membrane	Unknown
MYO-2	Myosin-13	Cytosol	Cytoskeleton
GPA-16	Guanine nucleotide-binding protein G(i) subunit alpha-1	Cytosol/Nucleus/Plasma membrane	Signaling
CAL-5	Calmodulin	Cytoskeleton/Cytosol	Signaling
F40A3.6	worm specifc	Unknown	Unknown
ELO-6	ELOVL fatty acid elongase 3/6	ER	Enzyme
TTR-44	TransThyretin-Related family domain	Plasma Membrane/Extracellular	worm specific
H06I04.6	worm specifc	Unknown	Unknown
GLY-3	polypeptide N-acetylgalactosaminyltransferase 1/13	Golgi	Enzyme
CPD-2	carboxypeptidase D isoform 2	Plasma Membrane	Enzyme
GFI-1	worm specifc	Unknown	Unknown
F57F4.4	worm specifc	Unknown	Unknown
CDF-1	Zinc transporter/SLC30A10	Endosome Early/Recycling	Transporter/Channel
TTB-1	Transcription initiation factor IIB/GTF2B	Nucleus	Signaling
PERM-2	worm specifc	Unknown	Unknown
CLP-2	Calpain-7	Nucleus	Enzyme
SEC-22	Vesicle-trafficking protein SEC22b	ER/Golgi/Melanosome	Trafficking
SQRD-1	Sulfide:quinone oxidoreductase, mitochondrial	Mitochondria	Enzyme
EMB-27	cell division cycle 16	Cytoskeleton/Cytosol	Enzyme
C17H12.2	human KIAA2013	Unknown	Unknown
K08E4.6	Transmembrane emp24 domain-containing protein 5	ER/Golgi	Trafficking
F10C5.2	nuclear envelope integral membrane protein 1	Nucleus	Structure
TTR-3	TransThyretin-Related family domain	Plasma Membrane/Extracellular	worm specific
SCRM-4	Phospholipid scramblase 2/3/4	Nucleus/Mitochondria	Enzyme
Y12A6A.1	worm specifc	Unknown	Unknown
ABHD-3.1	Abhydrolase domain-containing protein 3	Unknown	Enzyme
F56F10.1	Thymus-specific serine protease	Lysosome/Endosome	Enzyme
ZK856.5	Acid sphingomyelinase-like phosphodiesterase 3b	Secreted	Enzyme
XND-1	worm specifc	Unknown	Unknown
NHR-273	Nuclear Hormone Receptor	Nucleus	Transcription factor
TTR-14	TransThyretin-Related family domain	Plasma Membrane/Extracellular	Unknown
NLP-30	Neuropeptide-Like Protein	Extracellular	Signaling
TOC-1	similar to Transporter Of divalent Cations	Golgi	Transporter/Channel
COL-142	Collagen	Membrane	Structure
COL-143	Collagen	Membrane	Structure
ARRD-11	Ortholog of human ARRDC2 (arrestin domain containing 2)	Cytosol	Trafficking
RIB-2	Ortholog of human EXTL3 (exostosin like glycosyltransferase 3)	ER/Golgi/Membrane/Nucleus	Enzyme
ABTS-1	Electroneutral sodium bicarbonate exchanger 1	Synaptic Vesicle	Transporter/Channel
AMAN-1	Xaa-Pro dipeptidase	Lysosome	Enzyme
APH-2	Nicastrin, Essential subunit of the gamma-secretase complex	Plasma Membrane	Enzyme
AQP-1	Aquaporin-10, water channels	Lipid Droplet/Plasma Membrane	Transporter/Channel
ASP-4	Cathepsin D	Lysosome	Enzyme
ATGP-1	Neutral and basic amino acid transport protein rBAT, SLC3A1	Extracellular Exosome/Plasma Mebrane	Transporter/Channel
BAM-2	worm specific	Unknown	Unknown
C03A3.2	Transmembrane protein 104, the amino acid/auxin permease (aaap) family	Unknown	Transporter/Channel
C06H5.6	Solute carrier family 22 member 4, Sodium-ion dependent, low affinity carnitine transporter	Plasma Membrane/Mitochondria	Transporter/Channel
C15H9.9	Drosophila QUIVER protein, also known as SLEEPLESS protein, is a small (~15kDa) glycosylphosphatidylinositol (GPI)-anchored protein	Unknown	Other
C18B12.4	E3 ubiquitin-protein ligase RNF13	Lysosome/Endosome/Others	Enzyme
C18E9.9	worm specific	Unknown	Unknown
C29H12.2	solute carrier family 35 member F6, nucleotide-sugar transporter	Lysossome/Mitochondria	Transporter/Channel
C46C2.2	Solute carrier family 22 member 16, High affinity carnitine transporter	Plasma Membrane/Extracellular Exosome	Transporter/Channel
C53D5.5	Gamma-glutamyltranspeptidase 1	Plasma Membrane	Enzyme
CED-7	ATP-binding cassette sub-family A member 3, probably by transporting lipids such as cholesterol	Lysosome	Transporter/Channel
CHAT-1	Cell cycle control protein 50B,TMEM30A/TMEM30B, Accessory component of a P4-ATPase flippase complex which catalyzes the hydrolysis of ATP coupled to the transport of aminophospholipids from the outer to the inner leaflet of various membranes and ensures the maintenance of asymmetric distribution of phospholipids.	Lysosome/Plasma Membrane/Golgi	Transporter/Channel
CLH-1	Chloride channel protein 1	Plasma Membrane/Nucleus/Cytosol	Transporter/Channel
CNNM-1	Metal transporter CNNM2	Plasma Membrane	Transporter/Channel
CPZ-2	Cathepsin X	Lysosome	Enzyme
CUA-1	P-type Cu(+) transporter	Golgi	Transporter/Channel
DHS-1	Retinol dehydrogenase 14	Lysosome/ER	Enzyme
F09B12.3	Putative phospholipase B-like 2	Lysosome	Enzyme
F09G2.8	Phospholipase D3/NAPE-PLD	Lysosome/Endosome/Others	Enzyme
F09G8.7	Worm specific	Unknown	Unknown
F15B9.10	Worm specific	Unknown	Unknown
F17C11.12	Solute carrier family 22 member 15	Unknown	Transporter/Channel
F36A2.9	Phospholipase B1, membrane-associated	Plasma Membrane	Enzyme
F52H2.6	Delta(24)-sterol reductase, cholesterol biosynthesis	ER/Golgi	Enzyme
F54D1.6	Sushi domain-containing protein 2 (very weak homology)	Plasma Membrane	Signaling
FOLT-2	Folate transporter, SLC19A1	Plasma Membrane	Transporter/Channel
FPN-1.1	iron ion transmembrane transporter, SLC40A1	Plasma Membrane	Transporter/Channel
GANA-1	Alpha-N-acetylgalactosaminidase	Lysosome	Enzyme
GCP-2.1	Isoform PSMA-7 of Glutamate carboxypeptidase 2	Cytosol/Nucleus	Enzyme
GCY-28	Atrial natriuretic peptide receptor 1	Unknown	Signaling
GLT-1	L-glutamate transmembrane transporter, SLC1A2	Plasma Membrane	Transporter/Channel
GPA-17	Guanine nucleotide-binding protein G(q) subunit alpha	Golgi/Nucleus	Signaling
HAF-2	ATP-binding cassette sub-family B member 9	Lysosome	Transporter/Channel
HAF-4	ATP-binding cassette sub-family B member 9	Lysosome	Transporter/Channel
HAF-6	ATP-binding cassette sub-family B member 8, mitochondrial	Mitochondria	Transporter/Channel
HAF-7	ATP-binding cassette sub-family B member 9	Lysosome	Transporter/Channel
HAF-9	ATP-binding cassette sub-family B member 9	Lysosome	Transporter/Channel
HMT-1	ABC transporter, predicted to promote sequestration of heavy metal-containing phytochelatins into intracellular vacuoles	Lysosome?	Transporter/Channel
INX-12	innexin=invertebrate connexin analogue, gap junction proteins	Unknown	Other
INX-13	innexin=invertebrate connexin analogue, gap junction proteins	Unknown	Other
INX-15	innexin=invertebrate connexin analogue, gap junction proteins	Unknown	Other
INX-16	innexin=invertebrate connexin analogue, gap junction proteins	Unknown	Other
INX-2	innexin=invertebrate connexin analogue, gap junction proteins	Unknown	Other
INX-9	innexin=invertebrate connexin analogue, gap junction proteins	Unknown	Other
ITX-1	Contactin-associated protein-like 4	Synaptic Vesicle	Transmembrane Protein
K11D9.3	Solute carrier family 22 member 15	UNknown	Transporter/Channel
KDIN-1	Isoform 4 of Kinase D-interacting substrate of 220 kDa	Late endosome	Signaling
LAAT-1	Lysosomal amino acid transporter 1 homolog, SLC66A1	Lysosome?	Transporter/Channel
LIN-24	worm specific	Unknown	Unknown
LMP-1	Lysosome-associated membrane glycoprotein 1	Lysosome	Transmembrane Protein
LRON-7	Leucine-rich repeat-containing protein 15	Extracellular Exosome	Structure ?
LRP-1	Prolow-density lipoprotein receptor-related protein 1, Endocytic receptor involved in endocytosis and in phagocytosis of apoptotic cells.	Endosome?	Signaling
M05B5.4	Group XV phospholipase A2	Lysosome	Enzyme
MCT-3	Monocarboxylate transporter 14	Plasma Membrane	Transporter/Channel
MRP-1	Isoform 1 of Multidrug resistance-associated protein 4, ABCC3	Plasma Membrane	Transporter/Channel
MRP-5	Multidrug resistance-associated protein 4	Plasma Membrane	Transporter/Channel
NKB-3	Isoform 2 of Sodium/potassium-transporting ATPase subunit beta-1	Plasma Membrane	Transporter/Channel
NRF-5	Enables phosphatidylserine binding activity. Involved in lipid transport and positive regulation of engulfment of apoptotic cell	extracellular region	Other
PBO-1	Calcium-binding protein p22	Cytosol	Structure
PBO-4	Sodium/hydrogen exchanger 2	Lysosome?	Transporter/Channel
PERM-5	worm specific	Unknown	Unknown
PEZO-1	Isoform 3 of Protein PIEZO2 (piezo type mechanosensitive ion channel component 2)	Plasma Membrane	Transporter/Channel
PGP-6	multidrug resistance protein 3 isoform C , ABCB1/ABCB11/ABCB5	Unknown	Transporter/Channel
PHO-5	Lysosomal acid phosphatase	Lysosome	Enzyme
PMP-5	ATP-binding cassette sub-family D member 4	Peroxisome	Transporter/Channel
PPT-1	Palmitoyl-protein thioesterase 1	Lysosome	Enzyme
PTC-1	Isoform 2 of Protein patched homolog 2	Plasma Membrane	Signaling
PTR-21	Isoform 1 of Patched domain-containing protein 1	Plasma Membrane	Signaling
PTR-24	worm specific	Unknown	Unknown
R04B3.2	N(4)-(beta-N-acetylglucosaminyl)-L-asparaginase	Lysosome	Enzyme
R07E3.1	Cathepsin F	Lysosome	Enzyme
R09F10.1	Cathepsin L-like proteinase	Lysosome?	Enzyme
SCAV-3	Lysosome membrane protein 2	Lysosome	Transporter/Channel
SID-5	worm specific: involved in RNA interference and RNA transport	Late endosome	Other
SKAT-1	solute carrier family 36 member,proton-coupled amino acid transporter	Lysosome	Transporter/Channel
SLC-36.2	solute carrier family 36 member,proton-coupled amino acid transporter	Lysosome/Plasma Membrane	Transporter/Channel
T01C8.2	worm specifc	Unknown	Unknown
T12B3.2	Isoform 1 of Solute carrier family 22 member 15	Unknown	Transporter/Channel
T27F6.6	Sphingomyelin phosphodiesterase 2, Converts sphingomyelin to ceramide	Unknown	Enzyme
TAG-196	Cathepsin F	Lysosome	Enzyme
TAG-340	StAR-related lipid transfer protein 3	Endosome Late	Transporter/Channel
TAT-1	Phospholipid-transporting ATPase IA	Vesicles	Transporter/Channel
TAT-5	Probable phospholipid-transporting ATPase IIA	Endosome, Golgi	Transporter/Channel
TTR-24	worm specifc, Transthyretin-related protein	Unknown	Unknown
UNC-32	V-type proton ATPase 116 kDa subunit a isoform	Lysosome	Transporter/Channel
VHA-16	ATPase H+ transporting V0 subunit d1	Lysosome	Transporter/Channel
VHA-4	ATPase H+ transporting V0 subunit b	Lysosome	Transporter/Channel
VHA-6	ATPase H+ transporting V0 subunit a	Lysosome	Transporter/Channel
VHA-7	ATPase H+ transporting V0 subunit a	Lysosome	Transporter/Channel
Y37D8A.2	Putative phospholipase B-like 2	Lysosome	Enzyme
Y39A1A.22	Xenotropic and polytropic retrovirus receptor 1	Plasma Membrane	Transporter/Channel
Y39B6A.1	worm specifc	Unknown	Unknown
Y41D4A.4	Transmembrane 9 superfamily member 3	Unknown	Unknown
Y43F4B.7	SLC36A1:Proton-coupled amino acid transporter 1	Lysosome	Transporter/Channel
Y51A2D.18	Solute carrier family 22 member 7	Plasma Membrane	Transporter/Channel
Y54F10AM.8	Putative phospholipase B-like 2	Lysosome	Enzyme
Y58A7A.1	High affinity copper uptake protein 1, SLC31A1	Endosome/Plasma Membrane	Transporter/Channel
Y73F4A.1	worm specifc	Unknown	Unknown
Y82E9BR.16	Solute carrier family 22 member 4: Sodium-ion dependent, low affinity carnitine transporter.	Plasma Membrane/Mitochondria	Transporter/Channel
ZC8.6	phosphatidylinositol 4-kinase type 2 alpha/beta	Autophagosome/Endosome	Signaling/Trafficking
ZIG-11	Isoform Long of Down syndrome cell adhesion molecule (Weak homology)	Secreted/Plasma Membrane	Signaling
ZK6.11	worm specifc	Unknown	Unknown
