# Supplementary material for: Organelle proteomic profiling reveals lysosomal heterogeneity in association with longevity
Source: eLife. 2024 Jan 19;13:e85214. doi: 10.7554/eLife.85214 (PMC10876212; doi:10.7554/eLife.85214)
Supplement: Supplementary file 6. [file elife-85214-supp6.xlsx]

## Sheet: Sheet1
Table S6 Lysosome-enriched proteins identified from LMP-1 Lyso-IP using glp-1(lf) mutant in 25℃
Protein Name	Description	Subcellular location	Molecular function
AAT-1	Large neutral amino acids transporter	Lysosome/Plasma Membrane	Transporter/Channel
ABTS-1	Electroneutral sodium bicarbonate exchanger 1	Synaptic Vesicle	Transporter/Channel
ABTS-4	Isoform BAE3 of Anion exchange protein 3	Plasma Membrane	Transporter/Channel
AQP-1	Aquaporin-10, water channels	Lipid Droplet/Plasma Membrane	Transporter/Channel
AQP-7	Aquaporin-3	Plasma Membrane	Transporter/Channel
ARRD-18	Arrestin domain-containing protein 2	Early Endosome	Signaling/Trafficking
ASP-4	Cathepsin D	Lysosome	Enzyme
ATG-9	Autophagy-related protein 9A	Lysosome/Autophagosome	Trafficking
ATGP-1	Neutral and basic amino acid transport protein rBAT, SLC3A1	Extracellular Exosome/Plasma Mebrane	Transporter/Channel
ATGP-2	Neutral and basic amino acid transport protein rBAT	Unknown	Transporter/Channel
B0416.5	Major facilitator superfamily domain-containing protein 7	Lysosome	Transporter/Channel
BAM-2	worm specific	Unknown	Unknown
C03A3.2	Transmembrane protein 104, the amino acid/auxin permease (aaap) family	Unknown	Transporter/Channel
C06G8.3	SLC39A1/2	ER/Plasma membrane	Transporter/Channel
C15H9.9	Drosophila QUIVER protein, also known as SLEEPLESS protein, is a small (~15kDa) glycosylphosphatidylinositol (GPI)-anchored protein	Unknown	Other
C18B12.4	E3 ubiquitin-protein ligase RNF13	Lysosome/Endosome/Others	Enzyme
C18E9.9	worm specific	Unknown	Unknown
C29H12.2	solute carrier family 35 member F6, nucleotide-sugar transporter	Lysossome/Mitochondria	Transporter/Channel
C32D5.3	Protein EFR3 homolog B, probably acts as the membrane-anchoring component to localize phosphatidylinositol 4-kinase (PI4K) to the plasma membrane	Cytosol	Signaling/Trafficking
C46C2.2	Solute carrier family 22 member 16, High affinity carnitine transporter	Plasma Membrane/Extracellular Exosome	Transporter/Channel
C53D5.5	Gamma-glutamyltranspeptidase 1	Plasma Membrane	Enzyme
CAH-5	carbonic anhydrase 7	Cytosol	Enzyme
CATP-7	ATP13A3 (ATPase 13A3).	Endosome	Transporter/Enzyme
CHAT-1	Cell cycle control protein 50B,TMEM30A/TMEM30B, Accessory component of a P4-ATPase flippase complex which catalyzes the hydrolysis of ATP coupled to the transport of aminophospholipids from the outer to the inner leaflet of various membranes and ensures the maintenance of asymmetric distribution of phospholipids.	Lysosome/Plasma Membrane/Golgi	Transporter/Channel
CHT-4	Chitotriosidase-1	Lysosome/Extracelluar	Enzyme
CLH-1	Chloride channel protein 1	Plasma Membrane/Nucleus/Cytosol	Transporter/Channel
CLH-6	Chloride channel protein 7	Endosome (yeast)	Transporter/Channel
CNNM-1	Metal transporter CNNM2	Plasma Membrane	Transporter/Channel
CNNM-2	Metal transporter CNNM2	Plasma Membrane	Transporter/Channel
CPZ-2	Cathepsin X	Lysosome	Enzyme
CUA-1	P-type Cu(+) transporter	Golgi	Transporter/Channel
CUP-5	Mucolipin-3	Lysosome	Transporter/Channel
EAT-6	ATPase Na+/K+ transporting subunit alpha 3	Plasma Membrane	Transporter/Channel
F09B12.3	Putative phospholipase B-like 2	Lysosome	Enzyme
F09G8.7	Worm specific	Unknown	Unknown
F10G7.5	monocarboxylate transporter 12	Plasma membrane	Transporter/Channel
F15B9.10	Worm specific	Unknown	Unknown
F17C11.12	Solute carrier family 22 member 15	Unknown	Transporter/Channel
F20D1.1	calcium channel flower domain containing 1	Unknown	Transporter/Channel
F27D9.2	Major facilitator superfamily domain-containing protein 8	lysosome	Transporter/Channel
F36A2.9	Phospholipase B1, membrane-associated	Plasma Membrane	Enzyme
F40A3.2	Drosophila Tenascin accessory (Ten-a) encodes a type II dimeric transmembrane protein (weak homology)	Unknown	Unknown
F52H2.6	Delta(24)-sterol reductase, cholesterol biosynthesis	ER/Golgi	Enzyme
F53H8.3	Solute carrier family 2, facilitated glucose transporter member 1	Plasma Membrane/Melanosome	Transporter/Channel
F54D1.6	Sushi domain-containing protein 2 (very weak homology)	Plasma Membrane	Signaling
FMO-1	Dimethylaniline monooxygenase [N-oxide-forming] 5	ER	Enzyme
FMO-3	Dimethylaniline monooxygenase [N-oxide-forming] 5	ER	Enzyme
FOLT-2	Folate transporter, SLC19A1	Plasma Membrane	Transporter/Channel
FPN-1.1	iron ion transmembrane transporter, SLC40A1	Plasma Membrane	Transporter/Channel
FUT-8	Alpha-(1,6)-fucosyltransferase, Catalyzes the addition of fucose in alpha 1-6 linkage to the first GlcNAc residue	Golgi	Enzyme
GANA-1	Alpha-N-acetylgalactosaminidase	Lysosome	Enzyme
GCP-2.1	Isoform PSMA-7 of Glutamate carboxypeptidase 2	Cytosol/Nucleus	Enzyme
GCY-28	Atrial natriuretic peptide receptor 1	Unknown	Signaling
GLT-1	L-glutamate transmembrane transporter, SLC1A2	Plasma Membrane	Transporter/Channel
GSA-1	Guanine nucleotide-binding protein G(s) subunit alpha isoforms short	Plasma Membrane	Signaling
HAF-2	ATP-binding cassette sub-family B member 9	Lysosome	Transporter/Channel
HAF-4	ATP-binding cassette sub-family B member 9	Lysosome	Transporter/Channel
HAF-7	ATP-binding cassette sub-family B member 9	Lysosome	Transporter/Channel
HAF-8	ABCB9, Isoform 1 of ATP-binding cassette sub-family B member 9	Lysosome	Transporter/Channel
HAF-9	ATP-binding cassette sub-family B member 9	Lysosome	Transporter/Channel
HID-1	Isoform 1 of UPF0663 transmembrane protein C17orf28	Golgi	Unknown
HMR-1	Protocadherin Fat 1, Plays an essential role for cellular polarization, directed cell migration and modulating cell-cell contact	Plasma Membrane	Unknown
HMT-1	ABC transporter, predicted to promote sequestration of heavy metal-containing phytochelatins into intracellular vacuoles	Lysosome	Transporter/Channel
IGLR-2	Leucine-rich repeat-containing G-protein coupled receptor 4	Plasma Membrane	Signaling
INX-12	innexin=invertebrate connexin analogue, gap junction proteins	Unknown	Other
INX-15	innexin=invertebrate connexin analogue, gap junction proteins	Unknown	Other
INX-16	innexin=invertebrate connexin analogue, gap junction proteins	Unknown	Other
INX-9	innexin=invertebrate connexin analogue, gap junction proteins	Unknown	Other
ITX-1	Contactin-associated protein-like 4	Synaptic Vesicle	Transmembrane Protein
K10C9.3	ribonuclease T2, has ribonuclease activity, with higher activity at acidic pH. Probably is involved in lysosomal degradation of ribosomal RNA	Lysosome	Enzyme
KCC-2	solute carrier family 12 member 4 isoform e, potassium-chloride cotransport	Lysosome/Plasma Membrane	Transporter/Channel
KDIN-1	Isoform 4 of Kinase D-interacting substrate of 220 kDa	Late endosome	Signaling
LAAT-1	Lysosomal amino acid transporter 1 homolog, SLC66A1	Lysosome	Transporter/Channel
LET-805	myotactin, a novel single-transmembrane protein containing extracellular fibronectin repeats	Extracellular	Structure
LIN-24	worm specific	Unknown	Unknown
LIPL-7	Lysosomal acid lipase/cholesteryl ester hydrolase	Lysosome	Enzyme
LMP-1	Lysosome-associated membrane glycoprotein 1	Lysosome	Transmembrane Protein
LRON-7	Leucine-rich repeat-containing protein 15	Extracellular Exosome	Structure ?
LRP-1	Prolow-density lipoprotein receptor-related protein 1, Endocytic receptor involved in endocytosis and in phagocytosis of apoptotic cells.	Endosome	Signaling
M05B5.4	Group XV phospholipase A2	Lysosome	Enzyme
MCT-3	Monocarboxylate transporter 14	Plasma Membrane	Transporter/Channel
MCT-4	Monocarboxylate transporter 3	Plasma Membrane	Transporter/Channel
MCT-6	Monocarboxylate transporter 5	Plasma Membrane	Transporter/Channel
MRP-1	Isoform 1 of Multidrug resistance-associated protein 4, ABCC3	Plasma Membrane	Transporter/Channel
MRP-2	Canalicular multispecific organic anion transporter 1, ABCC3	Plasma Membrane	Transporter/Channel
MRP-4	Multidrug resistance-associated protein 1	Plasma membrane	Transporter/Channel
MRP-5	Multidrug resistance-associated protein 4	Plasma Membrane	Transporter/Channel
MYO-6	myosin heavy chain	Cytosol/Golgi/vesicle	Structure/traficking
NDG-4	worm specific	Unknown	Unknown
NKB-1	Isoform 1 of Sodium/potassium-transporting ATPase subunit beta-1	Plasma Membrane	Transporter/Channel
NKB-3	Isoform 2 of Sodium/potassium-transporting ATPase subunit beta-1	Plasma Membrane	Transporter/Channel
NLP-36	worm specific	Unknown	Signaling
NRF-5	Enables phosphatidylserine binding activity. Involved in lipid transport and positive regulation of engulfment of apoptotic cell	extracellular region	Other
PBO-1	Calcium-binding protein p22	Cytosol	Structure
PBO-4	Sodium/hydrogen exchanger 2	Lysosome	Transporter/Channel
PCP-1	Lysosomal Pro-X carboxypeptidase	Lysosome	Enzyme
PEZO-1	Isoform 3 of Protein PIEZO2 (piezo type mechanosensitive ion channel component 2)	Plasma Membrane	Transporter/Channel
PGP-2	Isoform 1 of Multidrug resistance protein 3	Plasma Membrane	Transporter/Channel
PGP-6	multidrug resistance protein 3 isoform C , ABCB1/ABCB11/ABCB5	Unknown	Transporter/Channel
PHO-1	Prostatic acid phosphatase	Lysosome/Secreted	Enzyme
PHO-5	Lysosomal acid phosphatase	Lysosome	Enzyme
PMP-3	ATP-binding cassette sub-family D member 4	Lysosome/ER	Transporter/Channel
PMP-5	ATP-binding cassette sub-family D member 4	Peroxisome	Transporter/Channel
PTR-21	Isoform 1 of Patched domain-containing protein 1	Plasma Membrane	Signaling
PTR-23	Patched domain-containing protein 3	Plasma Membrane	Signaling
PTR-24	worm specific	Unknown	Unknown
R02D5.3	worm specific	Unknown	Unknown
R07E3.1	Cathepsin F	Lysosome	Enzyme
R09A1.3	worm specific	Unknown	Unknown
R09F10.1	Cathepsin L-like proteinase	Lysosome	Enzyme
R12C12.9	worm specific	Unknown	Unknown
RHR-1	RHAG (Rh associated glycoprotein) and RHBG (Rh family B glycoprotein)	Plasma Membrane	Transporter/Channel
SAX-3	Roundabout homolog 2	Unknown	Signaling
SCAV-3	Lysosome membrane protein 2	Lysosome	Transporter/Channel
SKAT-1	solute carrier family 36 member,proton-coupled amino acid transporter	Lysosome	Transporter/Channel
SLCF-1	Monocarboxylate transporter 9	Plasma Membrane	Transporter/Channel
SMF-1	Natural resistance-associated macrophage protein 2: transport metal , in particular iron	Plasma membrane/early endosome/mitochondria	Transporter/Channel
SNF-3	Sodium- and chloride-dependent GABA transporter 1	Plasma Membrane	Transporter/Channel
SPP-13	worm specific	Unknown	Unknown
SRR-4	Erythrocyte band 7 integral membrane protein, Regulates ion channel activity and transmembrane ion transport	Unknown	Transporter/Channel
STR-176	Solute carrier family 22 member 5: Sodium-ion dependent, high affinity carnitine transporter	Extracellular Exosome/Plasma Mebrane	Transporter/Channel
SUR-7	worm specifc	Unknown	Unknown
T01H3.3	Vesicular glutamate transporter 3	Synaptic Vesicle	Transporter/Channel
T10B10.3	worm specifc	Unknown	Unknown
T10B11.2	Ceramide kinase	Cytosol	Enzyme
T10C6.6	Isoform 1 of Sugar phosphate exchanger, SLC37A3	ER	Transporter/Channel
T12B3.2	Isoform 1 of Solute carrier family 22 member 15	Unknown	Transporter/Channel
T19A6.1	Solute carrier family 66 member 2	Unknown	Transporter/Channel
T19C3.5	Bactericidal permeability-increasing protein	Secreted	Signaling ?
T27F6.6	Sphingomyelin phosphodiesterase 2, Converts sphingomyelin to ceramide	Unknown	Enzyme
TAG-340	StAR-related lipid transfer protein 3	Endosome Late	Transporter/Channel
TAT-5	Probable phospholipid-transporting ATPase IIA	Endosome, Golgi	Transporter/Channel
TRPA-1	Transient receptor potential cation channel subfamily A member 1	Plasma Membrane	Transporter/Channel
TTM-1	Zinc transporter	Apical plasma membrane/cytosol and endosomes?	Transporter/Channel
UNC-32	V-type proton ATPase 116 kDa subunit a isoform	Lysosome	Transporter/Channel
VAMP-7	Vesicle Associated Membrane Protein 8	Lysosome/Endosome	Trafficking
VER-3	Isoform Flt1 of Vascular endothelial growth factor receptor 1	Endosome	Signaling
VHA-4	ATPase H+ transporting V0 subunit b	Lysosome	Transporter/Channel
VHA-7	ATPase H+ transporting V0 subunit a	Lysosome	Transporter/Channel
WRK-1	Hemicentin-1 precursor	Extracellular	Structure
Y15E3A.4	ortholog is similar to solute carrier family 17	Endosome/Synaptic Vesicle	Transporter/Channel
Y32F6B.1	Solute carrier organic anion transporter family member 3A1	Plasma Membrane	Transporter/Channel
Y39A1A.22	Xenotropic and polytropic retrovirus receptor 1	Plasma Membrane	Transporter/Channel
Y43F4B.7	SLC36A1:Proton-coupled amino acid transporter 1	Lysosome	Transporter/Channel
Y48G10A.3	NDRG3	Extracellular Exosome/cytosol	Signaling
Y51A2D.18	Solute carrier family 22 member 7	Plasma Membrane	Transporter/Channel
Y51F10.11	worm specific	Unknown	Unknown
Y54F10AM.8	Putative phospholipase B-like 2	Lysosome	Enzyme
Y58A7A.1	High affinity copper uptake protein 1, SLC31A1	Endosome/Plasma Membrane	Transporter/Channel
Y73F4A.1	worm specifc	Unknown	Unknown
Y82E9BR.16	Solute carrier family 22 member 4: Sodium-ion dependent, low affinity carnitine transporter.	Plasma Membrane/Mitochondria	Transporter/Channel
Y92H12BR.3	worm specifc	Unknown	Unknown
ZC8.6	phosphatidylinositol 4-kinase type 2 alpha/beta	Autophagosome/Endosome	Signaling/Trafficking
ZIG-11	Isoform Long of Down syndrome cell adhesion molecule (Weak homology)	Secreted/Plasma Membrane	Signaling
ZIG-9	worm specifc	Unknown	Unknown
ZK6.11	worm specifc	Unknown	Unknown
HSP-70	Heat Shock Protein 70	Cytosol/Plasma membrane	Signaling
UNC-68	Ryanodine receptor 44F	membrane	Transporter/Channel
ACL-1	ACyLtransferase-like	ER	Enzyme
F10E7.6	Uncharacterized protein	membrane	Unknown
CEPT-2	Choline/EthanolaminePhosphoTransferase	Golgi and ERmembrane	Enzyme
DAO-5	ortholog of human NOLC1 (nucleolar and coiled-body phosphoprotein 1)	nucleolus and nucleoplasm	Enzyme
LGC-34	Ligand-Gated ion Channel	plasma membrane	Transporter/Channel
CAL-5	CALmodulin related genes	Unknown	Transporter/Channel
SYX-2	SYntaXin	presynaptic active zone membrane and synaptic vesicle	Transporter/Channel
EMC-1	EMC Endoplasmic Membrane protein Complex	ER	Transporter/Channel
CDF-1	Cation Diffusion Facilitator family	basolateral plasma membrane	Transporter/Channel
C25H3.7	worm specifc	cytoplasm	Unknown
F28B3.10	worm specifc	membrane	Unknown
LPD-6	Is an ortholog of human PPAN (peter pan homolog) and PPAN-P2RY11 (PPAN-P2RY11 readthrough)	membrane	Transporter/Channel
H06I04.6	worm specifc	Unknown	Unknown
ACS-22	fatty Acid CoA Synthetase family	ER	Enzyme
Y54G11A.17	structural constituent of ribosome	ribosome	Unknown
TAG-280	Temporarily Assigned Gene name	plasma membrane	Transporter/Channel
Y37A1B.17	DyNamin Binding Protein	Unknown	Transporter/Channel
PSD-1	PhosphatidylSerine Decarboxylase	lipid droplet and mitochondrion	Enzyme
AAT-4	Amino Acid Transporter	membrane	Transporter/Channel
SQST-1	SeQueSTosome related	cytoplasm	Unknown
SCRM-4	SCRaMblase (phospholipid scramblase)	membrane	Enzyme
Y69A2AR.3	NADH dehydrogenase [Ubiquinone] flaVoprotein)	membrane and mitochondrion	Enzyme
SLC-17.4	SLC (SoLute Carrier) homolog	membrane	Transporter/Channel
Y53F4B.14	unfolded protein binding activity	mitochondrion	Unknown
PQN-89	Prion-like-(Q/N-rich)-domain-bearing protein	membrane	Unknown
K11H12.4	worm specifc	Unknown	Transporter/Channel
D2023.6	Ortholog of human ADCK1 (aarF domain containing kinase 1)	mitochondrion	Unknown
ALGN-14	Asparagine Linked Glycosylation (ALG) homolog, Nematode	ER and nuclear membrane	Enzyme
C42D8.1	innate immune response	membrane	Unknown
TRA-2	TRAnsformer: XX animals transformed into males	nucleus; perinuclear region of cytoplasm; and plasma membrane	Signaling
DCT-11	DAF-16/FOXO Controlled, germline Tumor affecting	lysosome	Unknown
C14A4.6	worm specifc	membrane	Unknown
MBOA-3	Membrane Bound O-Acyl transferase, MBOAT	membrane	Enzyme
GLY-10	GLYcosylation related	Golgi	Enzyme
LGC-32	Ligand-Gated ion Channel	neuron projection; plasma membrane; and synapse	Transporter/Channel
Y44F5A.1	worm specifc	nucleolus	Unknown
F53C3.13	PhosphoLipid PhosPhatase homolog	membrane	Signaling
GLY-13	GLYcosylation related	cytoplasm	Enzyme
OAC-59	O-ACyltransferase homolog	membrane	Enzyme
C08B6.3	worm specifc	membrane	Enzyme
SFXN-5	SideroFleXiN (mitochondrial iron transporter)	mitochondrion	Transporter/Channel
C34C6.4	choline dehydrogenase	Unknown	Enzyme
