# Supplementary material for: Organelle proteomic profiling reveals lysosomal heterogeneity in association with longevity
Source: eLife. 2024 Jan 19;13:e85214. doi: 10.7554/eLife.85214 (PMC10876212; doi:10.7554/eLife.85214)
Supplement: Supplementary file 7. [file elife-85214-supp7.xlsx]

## Sheet: Sheet1
Table S7 Lysosome-enriched proteins identified from LMP-1 Lyso-IP using WT worms in 25℃
Protein Name		Description	Subcellular location	Molecular function
AAGR-2	Lysosomal alpha-glucosidase	Lysosome	Enzyme
AAT-1	Large neutral amino acids transporter	Lysosome/Plasma Membrane	Transporter/Channel
AAT-4	Amino Acid Transporter	membrane	Transporter/Channel
ABTS-1	Electroneutral sodium bicarbonate exchanger 1	Synaptic Vesicle	Transporter/Channel
ABTS-4	Isoform BAE3 of Anion exchange protein 3	Plasma Membrane	Transporter/Channel
AC3.5	Leucyl-cystinyl aminopeptidase	Secreted/Plasma membrane	Enzyme
ACS-22	fatty Acid CoA Synthetase family	ER	Enzyme
AHO-3	Abhydrolase domain-containing protein FAM108C1	Endosome recycling/Postsynaptic density membrane	Enzyme
AMAN-1	Xaa-Pro dipeptidase	Lysosome	Enzyme
APH-2	Nicastrin, Essential subunit of the gamma-secretase complex	Plasma Membrane	Enzyme
APL-1	Amyloid-like protein 1	Cytosol	Unknown
AQP-1	Aquaporin-10, water channels	Lipid Droplet/Plasma Membrane	Transporter/Channel
AQP-4	Aquaporin-8	Plasma Membrane/Mitochondria	Channel/Transporter
AQP-7	Aquaporin-3	Plasma Membrane	Transporter/Channel
AQP-8	Aquaporin-10	Lipid Droplet/Plasma Membrane	Transporter/Channel
ARF-6	ADP-ribosylation factor 6	Lysosome/Other	Trafficking
ARRD-14	Arrestin domain-containing protein 2	Plasma membrane/Cytosol	Trafficking
ARRD-18	Arrestin domain-containing protein 2	Early Endosome	Signaling/Trafficking
ARRD-25	Arrestin domain-containing protein 2	Early Endosome	Signaling/Trafficking
ASM-1	Sphingomyelin phosphodiesterase	Lysosome	Enzyme
ASP-4	Cathepsin D	Lysosome	Enzyme
ATG-9	Autophagy-related protein 9A	Lysosome/Autophagosome	Trafficking
ATGP-1	Neutral and basic amino acid transport protein rBAT, SLC3A1	Extracellular Exosome/Plasma Mebrane	Transporter/Channel
ATGP-2	Neutral and basic amino acid transport protein rBAT	Unknown	Transporter/Channel
AVR-15	Isoform Alpha-3K of Glycine receptor subunit alpha-3	Plasma Membrane	Signaling
B0416.5	Major facilitator superfamily domain-containing protein 7	Lysosome	Transporter/Channel
B0454.5	worm specific	Unknown	Unknown
BAM-2	worm specific	Unknown	Unknown
BEST-14	Bestrophin-2, calcium-sensitive chloride channels	Plasma Membrane	Transporter/Channel
BGAL-1	Beta-galactosidase	Lysosome	Enzyme
BLI-4	Isoform PACE4A-II of Proprotein convertase subtilisin/kexin type 6	Secreted	Enzyme
BRP-1	worm specific	Unknown	Unknown
C03A3.2	Transmembrane protein 104, the amino acid/auxin permease (aaap) family	Unknown	Transporter/Channel
C06G8.3	SLC39A1/2	ER/Plasma membrane	Transporter/Channel
C06H5.6	Solute carrier family 22 member 4, Sodium-ion dependent, low affinity carnitine transporter	Plasma Membrane/Mitochondria	Transporter/Channel
C08B6.3	worm specifc	membrane	Enzyme
C14A4.6	worm specifc	membrane	Unknown
C14F11.4	Worm specific	Unknown	Unknown
C15H9.9	Drosophila QUIVER protein, also known as SLEEPLESS protein, is a small (~15kDa) glycosylphosphatidylinositol (GPI)-anchored protein	Unknown	Other
C18B12.4	E3 ubiquitin-protein ligase RNF13	Lysosome/Endosome/Others	Enzyme
C18E9.9	worm specific	Unknown	Unknown
C23H3.2	worm specific	Unknown	Unknown
C29E4.10	Isoform 1 of Galactocerebrosidase	Lysosome	Enzyme
C29H12.2	solute carrier family 35 member F6, nucleotide-sugar transporter	Lysossome/Mitochondria	Transporter/Channel
C30F12.5	worm specific	Unknown	Unknown
C32D5.3	Protein EFR3 homolog B, probably acts as the membrane-anchoring component to localize phosphatidylinositol 4-kinase (PI4K) to the plasma membrane	Cytosol	Signaling/Trafficking
C33A11.2	DNA damage-regulated autophagy modulator protein 2	Lysosome	Trafficking ?
C33G3.4	Beta-mannosidase	Lysosome	Enzyme
C35A5.6	worm specific	Unknown	Unknown
C36B7.6	CLPTM1 regulator of GABA type A receptor forward trafficking	Unknown	Trafficking ?
C46C2.2	Solute carrier family 22 member 16, High affinity carnitine transporter	Plasma Membrane/Extracellular Exosome	Transporter/Channel
C48E7.1	worm specific	Unknown	Unknown
C53D5.5	Gamma-glutamyltranspeptidase 1	Plasma Membrane	Enzyme
CAH-5	carbonic anhydrase 7	Cytosol	Enzyme
CAL-5	CALmodulin related genes	Unknown	Transporter/Channel
CATP-3	Sodium/potassium-transporting ATPase subunit alpha-2	Plasma membrane	Transporter/Channel
CATP-6	ATP13A3 (ATPase 13A3).	Endosome	Transporter/Enzyme
CDF-1	Cation Diffusion Facilitator family	basolateral plasma membrane	Transporter/Channel
CED-7	ATP-binding cassette sub-family A member 3, probably by transporting lipids such as cholesterol	Lysosome	Transporter/Channel
CHAT-1	Cell cycle control protein 50B,TMEM30A/TMEM30B, Accessory component of a P4-ATPase flippase complex which catalyzes the hydrolysis of ATP coupled to the transport of aminophospholipids from the outer to the inner leaflet of various membranes and ensures the maintenance of asymmetric distribution of phospholipids.	Lysosome/Plasma Membrane/Golgi	Transporter/Channel
CHPF-1	Calcium-binding protein p22	Cytosol	Trafficking
CHT-4	Chitotriosidase-1	Lysosome/Extracelluar	Enzyme
CLH-1	Chloride channel protein 1	Plasma Membrane/Nucleus/Cytosol	Transporter/Channel
CLH-5	chloride voltage-gated channel 4	Endosome (yeast)	Transporter/Channel
CLH-6	Chloride channel protein 7	Endosome (yeast)	Transporter/Channel
CNNM-1	Metal transporter CNNM2	Plasma Membrane	Transporter/Channel
CNNM-2	Metal transporter CNNM2	Plasma Membrane	Transporter/Channel
COL-101	Collagen	Extracellular Matrix	Structure
COL-122	Isoform 3 of Collagen alpha-1(XXI) chain	Extracellular material	Structure
COL-179	Collagen alpha-5(VI) chain	Extracellular Matrix	Structure
COL-19	Isoform 1 of Collagen alpha-5(VI) chain	Extracellular	Structure
CPD-1	carboxypeptidase D isoform 2	Plasma Membrane	Enzyme
CPR-6	Cathepsin B	Lysosome	Enzyme
CPZ-1	Cathepsin Z	Lysosome	Enzyme
CPZ-2	Cathepsin X	Lysosome	Enzyme
CTSA-2	lysosomal protective protein isoform a precursor	Lysosome	Signaling/Enzyme
CUA-1	P-type Cu(+) transporter	Golgi	Transporter/Channel
CUP-5	Mucolipin-3	Lysosome	Transporter/Channel
DAF-4	Activin receptor type-2B	Plasma Membrane	Signaling
DAGL-2	Sn1-specific diacylglycerol lipase beta	Plasma membrane	Enzyme
DCT-11	DAF-16/FOXO Controlled, germline Tumor affecting	lysosome	Unknown
DEL-6	Amiloride-sensitive cation channel 5	Plasma Membrane	Transporter/Channel
DHS-1	Retinol dehydrogenase 14	Lysosome/ER	Enzyme
DHS-22	Retinol dehydrogenase 12	ER	Enzyme
DNJ-14	DnaJ homolog subfamily C member 5	Cytosol	Trafficking
DPF-2	Isoform 1 of Seprase	Plasma Membrane	Enzyme
DPM-1	Dolichol-phosphate mannosyltransferase	ER	Enzyme
DRR-1	worm specific	Unknown	Unknown
E04F6.4	Phospholipase D3	Lysosome/Endosome/Others	Enzyme
EAT-6	ATPase Na+/K+ transporting subunit alpha 3	Plasma Membrane	Transporter/Channel
EGL-30	Guanine nucleotide-binding protein subunit alpha-14	Exosome	Enzyme
ENT-2	Equilibrative nucleoside transporter 2	Lysosome/Plasma Membrane	Transporter/Channel
ESYT-2	Isoform 2 of Extended synaptotagmin-2	ER/Plasma membrane	Structure
F08F1.4	worm specifc	Unknown	Unknown
F09B12.3	Putative phospholipase B-like 2	Lysosome	Enzyme
F09G2.8	Phospholipase D3/NAPE-PLD	Lysosome/Endosome/Others	Enzyme
F09G8.7	Worm specific	Unknown	Unknown
F10G7.5	monocarboxylate transporter 12	Plasma membrane	Transporter/Channel
F11G11.5	worm specific	Unknown	Unknown
F14E5.2	Golgi apparatus protein 1	Golgi	Structure
F14F9.5	worm specific	Unknown	Unknown
F15B9.10	Worm specific	Unknown	Unknown
F17C11.12	Solute carrier family 22 member 15	Unknown	Transporter/Channel
F20D1.1	calcium channel flower domain containing 1	Unknown	Transporter/Channel
F27C1.2	High affinity copper uptake protein 1	Plasma Membrane	Channel/Transporter
F35E12.10	worm specific	Unknown	Unknown
F36A2.9	Phospholipase B1, membrane-associated	Plasma Membrane	Enzyme
F37H8.5	Gamma-interferon-inducible lysosomal thiol reductase	Lysosome	Enzyme
F40A3.2	Drosophila Tenascin accessory (Ten-a) encodes a type II dimeric transmembrane protein (weak homology)	Unknown	Unknown
F40F9.5	Solute carrier family 46 member 3	Lysosome/Extracellular Exosome	Channel/Transporter
F41C3.5	cathepsin A	Lysosome	Enzyme
F42G10.1	Predicted to enable metallopeptidase activity	Unknown	Enzyme
F44E2.10	Malectin	ER	Structure
F47B7.2	Isoform 2 of Sulfhydryl oxidase 1	Golgi/extracellular	Enzyme
F49C12.12	Ribonuclease kappa	Endosome	Trafficking
F49H12.5	Thioredoxin domain-containing protein 12	ER	Enzyme
F52H2.6	Delta(24)-sterol reductase, cholesterol biosynthesis	ER/Golgi	Enzyme
F53C3.13	PhosphoLipid PhosPhatase homolog	membrane	Signaling
F53H8.3	Solute carrier family 2, facilitated glucose transporter member 1	Plasma Membrane/Melanosome	Transporter/Channel
F54D1.6	Sushi domain-containing protein 2 (very weak homology)	Plasma Membrane	Signaling
F54E2.1	worm specific	Unknown	Unknown
FAAH-1	Fatty acid amide hydrolase 1	Cytoskeleton	Enzyme
FGT-1	Solute carrier family 2, facilitated glucose transporter member 3	Plasma Membrane	Transporter/Channel
FMO-1	Dimethylaniline monooxygenase [N-oxide-forming] 5	ER	Enzyme
FOLT-2	Folate transporter, SLC19A1	Plasma Membrane	Transporter/Channel
FPN-1.1	iron ion transmembrane transporter, SLC40A1	Plasma Membrane	Transporter/Channel
FUT-8	Alpha-(1,6)-fucosyltransferase, Catalyzes the addition of fucose in alpha 1-6 linkage to the first GlcNAc residue	Golgi	Enzyme
GANA-1	Alpha-N-acetylgalactosaminidase	Lysosome	Enzyme
GCP-2.1	Isoform PSMA-7 of Glutamate carboxypeptidase 2	Cytosol/Nucleus	Enzyme
GCY-28	Atrial natriuretic peptide receptor 1	Unknown	Signaling
GFI-2	Protein phosphatase 1 regulatory inhibitor subunit 16B	Plasma membrane/Nucleus	Signaling
GLT-1	L-glutamate transmembrane transporter, SLC1A2	Plasma Membrane	Transporter/Channel
GLY-10	GLYcosylation related	Golgi	Enzyme
GLY-13	GLYcosylation related	cytoplasm	Enzyme
GLY-3	polypeptide N-acetylgalactosaminyltransferase 1/13	Golgi	Enzyme
GLY-5	Polypeptide N-acetylgalactosaminyltransferase 1	Golgi	Enzyme
GLY-7	N-acetylgalactosaminyltransferase 7	Golgi	Enzyme
GOA-1	Guanine nucleotide-binding protein G(i) subunit alpha	Cytosol	Signaling
GPA-16	Guanine nucleotide-binding protein G(i) subunit alpha-1	Cytosol/Plasma Membrane/Nucleus	Channel/Transporter
GPA-17	Guanine nucleotide-binding protein G(q) subunit alpha	Golgi/Nucleus	Signaling
GPB-1	Guanine nucleotide-binding protein G(I)/G(S)/G(T) subunit beta	Cytosol/perinuclear	Signaling
GSA-1	Guanine nucleotide-binding protein G(s) subunit alpha isoforms short	Plasma Membrane	Signaling
H03A11.1	FAM20-related Kinase	Secreted	Enzyme
HAF-2	ATP-binding cassette sub-family B member 9	Lysosome	Transporter/Channel
HAF-4	ATP-binding cassette sub-family B member 9	Lysosome	Transporter/Channel
HAF-7	ATP-binding cassette sub-family B member 9	Lysosome	Transporter/Channel
HAF-9	ATP-binding cassette sub-family B member 9	Lysosome	Transporter/Channel
HEX-1	Beta-hexosaminidase subunit beta	Lysosome	Enzyme
HEX-5	Hexosaminidase D	Cytosol	Enzyme
HMR-1	Protocadherin Fat 1, Plays an essential role for cellular polarization, directed cell migration and modulating cell-cell contact	Plasma Membrane	Unknown
HMT-1	ABC transporter, predicted to promote sequestration of heavy metal-containing phytochelatins into intracellular vacuoles	Lysosome?	Transporter/Channel
IGDB-2	Immunoglobulin superfamily DCC subclass member 4	Plasma membrane	Unknown
IGLR-2	Leucine-rich repeat-containing G-protein coupled receptor 4	Plasma Membrane	Signaling
ILE-2	Vesicular integral-membrane protein VIP36	ER/Golgi	Structure
INA-1	Integrin alpha-6	Plasma Membrane	Signaling
INX-12	innexin=invertebrate connexin analogue, gap junction proteins	Unknown	Other
INX-13	innexin=invertebrate connexin analogue, gap junction proteins	Unknown	Other
INX-15	innexin=invertebrate connexin analogue, gap junction proteins	Unknown	Other
INX-16	innexin=invertebrate connexin analogue, gap junction proteins	Unknown	Other
INX-17	innexin=invertebrate connexin analogue, gap junction proteins	Unknown	Other
INX-5	innexin=invertebrate connexin analogue, gap junction proteins	Unknown	Other
INX-9	innexin=invertebrate connexin analogue, gap junction proteins	Unknown	Other
ITR-1	Isoform 6 of Inositol 1,4,5-trisphosphate receptor type 1	ER	Signaling
ITX-1	Contactin-associated protein-like 4	Synaptic Vesicle	Transmembrane Protein
K07A1.17	worm specifc	Unknown	Structure
K10C9.3	ribonuclease T2, has ribonuclease activity, with higher activity at acidic pH. Probably is involved in lysosomal degradation of ribosomal RNA	Lysosome	Enzyme
K11H12.4	worm specifc	Unknown	Transporter/Channel
K11H12.7	worm specific	Unknown	Unknown
K12H6.6	TLC domain-containing protein 1	Plasma Membrane	Structure
KCC-2	solute carrier family 12 member 4 isoform e, potassium-chloride cotransport	Lysosome/Plasma Membrane	Transporter/Channel
KDIN-1	Isoform 4 of Kinase D-interacting substrate of 220 kDa	Late endosome	Signaling
KYNU-1	Kynureninase, Catalyzes the cleavage of L-kynurenine (L-Kyn) and L-3-hydroxykynurenine (L-3OHKyn) into anthranilic acid (AA) and 3-hydroxyanthranilic acid (3-OHAA)	Cytosol	Enzyme
LAAT-1	Lysosomal amino acid transporter 1 homolog, SLC66A1	Lysosome?	Transporter/Channel
LEC-12	Galectin-9	Lysosome	Signaling
LEC-3	Galectin-4, 9	Lysosome	Signaling
LEC-4	galectin 4	Cytosol	Signaling
LEC-6	galectin 12	Nucleus	Signaling
LEC-8	galectin 3	Cytosol	Signaling
LET-413	Leucine-rich repeat-containing protein 1	Cytosol	Unknown
LET-60	GTPase KRas	Cytosol	Signaling
LET-805	myotactin, a novel single-transmembrane protein containing extracellular fibronectin repeats	Extracellular	Structure
LFI-1	Rootletin	Cytoskeleton	Structure
LIN-24	worm specific	Unknown	Unknown
LIN-33	worm specific	Unknown	Unknown
LIPL-7	Lysosomal acid lipase/cholesteryl ester hydrolase	Lysosome	Enzyme
LMP-1	Lysosome-associated membrane glycoprotein 1	Lysosome	Transmembrane Protein
LMTR-5	Ragulator complex protein LAMTOR5	Lysosome	Signaling
LPD-3	Transmembrane protein KIAA1109	Endosome	Trafficking
LRON-7	Leucine-rich repeat-containing protein 15	Extracellular Exosome	Structure ?
LRON-8	Isoform 1 of Slit homolog 3 protein	Secreted/Plasma membrane	Signaling
LRP-1	Prolow-density lipoprotein receptor-related protein 1, Endocytic receptor involved in endocytosis and in phagocytosis of apoptotic cells.	Endosome?	Signaling
LYS-1	worm specifc	Unknown	Unknown
LYS-8	worm specifc	Unknown	Unknown
M05B5.4	Group XV phospholipase A2	Lysosome	Enzyme
MANS-1	Mannosyl-oligosaccharide 1,2-alpha-mannosidase IA, Involved in the maturation of Asn-linked oligosaccharides. Progressively trim alpha-1,2-linked mannose residues from Man9GlcNAc2 to produce Man5GlcNAc2.	ER	Enzyme
MANS-3	Endoplasmic reticulum mannosyl-oligosaccharide 1,2-alpha-mannosidase	ER	Enzyme
MCA-3	encodes one of three C. elegans plasma membrane Ca2+ ATPases (PMCAs); by homology, MCA-3 is predicted to function as a molecular pump that couples ATP hydrolysis to extrusion of cytosolic Ca2+; mca-3 activity is required for endocytosis	Plasma Membrane	Transporter/Channel
MCT-3	Monocarboxylate transporter 14	Plasma Membrane	Transporter/Channel
MCT-4	Monocarboxylate transporter 3	Plasma Membrane	Transporter/Channel
MCT-6	Monocarboxylate transporter 5	Plasma Membrane	Transporter/Channel
MRP-1	Isoform 1 of Multidrug resistance-associated protein 4, ABCC3	Plasma Membrane	Transporter/Channel
MRP-2	Canalicular multispecific organic anion transporter 1, ABCC3	Plasma Membrane	Transporter/Channel
MRP-3	ATP-binding cassette sub-family C member 8	Plasma Membrane	Transporter/Channel
MRP-4	Multidrug resistance-associated protein 1	Plasma membrane	Transporter/Channel
MRP-5	Multidrug resistance-associated protein 4	Plasma Membrane	Transporter/Channel
MRP-7	Multidrug resistance-associated protein 6	ER/Plasma membrane	Transporter/Channel
MUP-4	Matrilin-2	Extracellular Matrix	Structure
NAPE-2	N-acyl-phosphatidylethanolamine-hydrolyzing phospholipase D	Endosome/Golgi/Nucleus	Enzyme
NCX-1	sodium/calcium exchanger 1 isoform B	Unknown	Transporter/Channel
NCX-3	Isoform 3 of Sodium/calcium exchanger 1	Mitochondria	Transporter/Channel
NDG-4	worm specific	Unknown	Unknown
NEX-2	Isoform 2 of Annexin A7	ER/nucleus/extracellular region	Structure
NKB-1	Isoform 1 of Sodium/potassium-transporting ATPase subunit beta-1	Plasma Membrane	Transporter/Channel
NKB-3	Isoform 2 of Sodium/potassium-transporting ATPase subunit beta-1	Plasma Membrane	Transporter/Channel
NKCC-1	Solute carrier family 12 member 2, SLC12A1/2/3	Plasma Membrane	Channel/Transporter
NLP-36	worm specific	Unknown	Signaling
NRF-5	Enables phosphatidylserine binding activity. Involved in lipid transport and positive regulation of engulfment of apoptotic cell	extracellular region	Other
NRF-6	Predicted to enable acyltransferase activity, transferring groups other than amino-acyl groups and lipid binding activity. Predicted to be involved in lipid transport.	membrane	Enzyme
NSTP-5	UDP-N-acetylglucosamine transporter	Golgi	Transporter/Channel
ORAI-1	Protein orai-2	membrane	Signaling
PBO-1	Calcium-binding protein p22	Cytosol	Structure
PBO-4	Sodium/hydrogen exchanger 2	Lysosome?	Transporter/Channel
PCP-1	Lysosomal Pro-X carboxypeptidase	Lysosome	Enzyme
PCP-3	Thymus-specific serine protease	Unknown	Enzyme
PCP-5	Lysosomal Pro-X carboxypeptidase	Lysosome	Enzyme
PEZO-1	Isoform 3 of Protein PIEZO2 (piezo type mechanosensitive ion channel component 2)	Plasma Membrane	Transporter/Channel
PGP-2	Isoform 1 of Multidrug resistance protein 3	Plasma Membrane	Transporter/Channel
PGP-3	ATP-binding cassette sub-family C member 2	Plasma membrane	Transporter/Channel
PGP-6	multidrug resistance protein 3 isoform C , ABCB1/ABCB11/ABCB5	Unknown	Transporter/Channel
PGP-8	ATP-binding cassette sub-family C member 3	Plasma membrane	Transporter/Channel
PHO-5	Lysosomal acid phosphatase	Lysosome	Enzyme
PKC-2	Protein kinase C, alpha variant (Fragment)	Cytosol	Signaling
PLC-4	1-phosphatidylinositol-4,5-bisphosphate phosphodiesterase delta-3	Cytosol	Enzyme
PLD-1	Isoform PLD1B of Phospholipase D1	Endosome/Golgi/ER	Enzyme
PMP-3	ATP-binding cassette sub-family D member 4	Lysosome/ER	Transporter/Channel
PMP-5	ATP-binding cassette sub-family D member 4	Peroxisome	Transporter/Channel
PPK-1	Phosphatidylinositol-4-phosphate 5-kinase type-1 alpha	Plasma Membrane	Signaling/Trafficking
PTR-21	Isoform 1 of Patched domain-containing protein 1	Plasma Membrane	Signaling
PTR-24	worm specific	Unknown	Unknown
R02D5.3	worm specific	Unknown	Unknown
R02F11.3	worm specifc	Unknown	Channel/Transporter
R04B3.2	N(4)-(beta-N-acetylglucosaminyl)-L-asparaginase	Lysosome	Enzyme
R07E3.1	Cathepsin F	Lysosome	Enzyme
R08F11.1	Isoform 1 of Non-lysosomal glucosylceramidase	ER/Golgi	Enzyme
R09F10.1	Cathepsin L-like proteinase	Lysosome?	Enzyme
R12C12.9	worm specific	Unknown	Unknown
R144.6	Isoform 1 of Transmembrane protein 144	Unknown	Transporter/Channel
RAB-6.1	Isoform 1 of Ras-related protein Rab-6A	Golgi	Trafficking
RHR-1	RHAG (Rh associated glycoprotein) and RHBG (Rh family B glycoprotein)	Plasma Membrane	Transporter/Channel
ROM-1	Rhomboid-related protein 4	Mitochondria/ER	Enzyme
SAC-1	Phosphatidylinositide phosphatase SAC1	ER/Golgi	Enzyme
SAX-3	Roundabout homolog 2	Unknown	Signaling
SCAV-3	Lysosome membrane protein 2	Lysosome	Transporter/Channel
SCPL-1	Isoform 1 of Carboxy-terminal domain RNA polymerase II polypeptide A small phosphatase 1	Nucleus	Enzyme
SCRM-4	SCRaMblase (phospholipid scramblase)	membrane	Enzyme
SID-1	Isoform 1 of SID1 transmembrane family member 1, dsRNA channel	Unknown	Transporter/Channel
SID-5	worm specific: involved in RNA interference and RNA transport	Late endosome	Other
SKAT-1	solute carrier family 36 member,proton-coupled amino acid transporter	Lysosome	Transporter/Channel
SLC-17.2	slc17.2 Sialin: transports glucuronic acid and free sialic acid out of the lysosome	Lysosome, synaptic vesicle	Transporter/Channel
SLC-17.4	SLC (SoLute Carrier) homolog	membrane	Transporter/Channel
SLC-36.2	solute carrier family 36 member,proton-coupled amino acid transporter	Lysosome/Plasma Membrane	Transporter/Channel
SLCF-1	Monocarboxylate transporter 9	Plasma Membrane	Transporter/Channel
SMF-1	Natural resistance-associated macrophage protein 2: transport metal , in particular iron	Plasma membrane/early endosome/mitochondria	Transporter/Channel
SNF-3	Sodium- and chloride-dependent GABA transporter 1	Plasma Membrane	Transporter/Channel
SOD-4	Superoxide dismutase [Cu-Zn]	Extracellular region/Cytosol/Lysosome/Mitochondrial/peroxisome	Enzyme
SPIN-4	Isoform 1 of Protein spinster homolog 1/Drososphila lysosomal permease	Lysosome	Transporter/Channel
SPP-13	worm specific	Unknown	Unknown
SRC-1	Isoform 1 of Tyrosine-protein kinase Fyn	Cytosol/Nucleus	Signaling
SRR-4	Erythrocyte band 7 integral membrane protein, Regulates ion channel activity and transmembrane ion transport	Unknown	Transporter/Channel
SULP-7	solute carrier family 26	Endosome/Cell membrane	Transporter/Channel
SUR-7	worm specifc	Unknown	Unknown
SYX-3	Syntaxin-1B	Cytoskeleton	Trafficking
T01C8.2	worm specifc	Unknown	Unknown
T01D3.6	IgGFc-binding protein (weak homology)	secreted	Structure
T01G5.1	Vascular endothelial growth factor receptor 3	Cytosol/Nucleus	Signaling
T01H3.3	Vesicular glutamate transporter 3	Synaptic Vesicle	Transporter/Channel
T04B8.5	Solute carrier family 12 member 9	Plasma membrane	Transporter/Channel
T04C12.11	worm specific	Unknown	Unknown
T05E12.3	potassium channel tetramerization domain containing	Unknown	Transporter/Channel
T07A9.10	Syntaxin-binding protein 1	Cytosol	Trafficking
T10B11.2	Ceramide kinase	Cytosol	Enzyme
T10C6.6	Isoform 1 of Sugar phosphate exchanger, SLC37A3	ER	Transporter/Channel
T11G6.2	Sugar phosphate exchanger 3, SLC37A3	ER	Transporter/Channel
T12B3.2	Isoform 1 of Solute carrier family 22 member 15	Unknown	Transporter/Channel
T13C2.6	Isoform Short of Very low-density lipoprotein receptor	Unknown	Trafficking
T19A6.1	Solute carrier family 66 member 2	Unknown	Transporter/Channel
T19C3.5	Bactericidal permeability-increasing protein	Secreted	Signaling ?
T21C9.6	worm specific	Unknown	Unknown
T27F6.6	Sphingomyelin phosphodiesterase 2, Converts sphingomyelin to ceramide	Unknown	Enzyme
T28D9.3	Phospholipid phosphatase	Plasma Membrane	Enzyme
TAG-10	worm specific	Unknown	Unknown
TAG-123	Transmembrane 9 superfamily	Endosome	Unknown
TAG-196	Cathepsin F	Lysosome	Enzyme
TAG-340	StAR-related lipid transfer protein 3	Endosome Late	Transporter/Channel
TAT-1	Phospholipid-transporting ATPase IA	Vesicles	Transporter/Channel
TAT-5	Probable phospholipid-transporting ATPase IIA	Endosome, Golgi	Transporter/Channel
TOC-1	zinc transporter 6 isoform 4, SLC39A6	Plasma Membrane	Channel/Transporter
TOL-1	Toll-like receptor	Secreted	Signaling
TRA-3	Calpain-5	extracellular exosome	Enzyme
TRPA-1	Transient receptor potential cation channel subfamily A member 1	Plasma Membrane	Transporter/Channel
TSP-9	Tetraspanin-8 ortholog	Unknown	Unknown
TTR-2	worm specifc, Transthyretin-related protein	Unknown	Unknown
TTR-24	worm specifc, Transthyretin-related protein	Unknown	Unknown
TTR-3	TransThyretin-Related family domain	Plasma Membrane/Extracellular	Unknown
TTR-5	worm specifc, Transthyretin-related protein	Unknown	Unknown
TTR-6	worm specifc, Transthyretin-related protein	Unknown	Unknown
TTYH-1	Protein tweety homolog 3: probable large-conductance Ca2+-activated chloride channel	Plasma membrane	Transporter/Channel
UNC-108	Ras-related protein Rab-2B	Lysosome	Signaling/Trafficking
UNC-32	V-type proton ATPase 116 kDa subunit a isoform	Lysosome	Transporter/Channel
UNC-70	two isoforms of a beta-spectrin ortholog	Cytoskeleton	Structure
VER-3	Isoform Flt1 of Vascular endothelial growth factor receptor 1	Endosome	Signaling
VHA-1	Vacuolar H ATPase	Lysosome	Transporter/Channel
VHA-2	Vacuolar H ATPase	Lysosome	Transporter/Channel
VHA-3	Vacuolar H ATPase	Lysosome	Transporter/Channel
VHA-4	ATPase H+ transporting V0 subunit b	Lysosome	Transporter/Channel
VHA-5	V-type proton ATPase 116 kDa subunit a2	Lysosome	Transporter/Channel
VHA-6	ATPase H+ transporting V0 subunit a	Lysosome	Transporter/Channel
VHA-7	ATPase H+ transporting V0 subunit a	Lysosome	Transporter/Channel
VTI-1	Vesicle transport through interaction with t-SNAREs homolog 1A	Endosome/Golgi	Trafficking
WRK-1	Hemicentin-1 precursor	Extracellular	Structure
WWP-1	NEDD4-like E3 ubiquitin-protein ligase WWP1	Early endosomes/nucleus(shuttling)	Enzyme
Y12A6A.1	worm specifc	Unknown	Unknown
Y15E3A.4	ortholog is similar to solute carrier family 17	Endosome/Synaptic Vesicle	Transporter/Channel
Y32F6A.5	Retinoid-inducible serine carboxypeptidase	Secreted	Enzyme
Y32F6B.1	Solute carrier organic anion transporter family member 3A1	Plasma Membrane	Transporter/Channel
Y37D8A.2	Putative phospholipase B-like 2	Lysosome	Enzyme
Y39A1A.22	Xenotropic and polytropic retrovirus receptor 1	Plasma Membrane	Transporter/Channel
Y41D4A.4	Transmembrane 9 superfamily member 3	Unknown	Unknown
Y41E3.1	Worm specifc	Unknown	Unknown
Y43F4B.7	SLC36A1:Proton-coupled amino acid transporter 1	Lysosome	Transporter/Channel
Y44F5A.1	worm specifc	nucleolus	Unknown
Y48G10A.3	NDRG3	Extracellular Exosome/cytosol	Signaling
Y51A2D.18	Solute carrier family 22 member 7	Plasma Membrane	Transporter/Channel
Y51F10.11	worm specific	Unknown	Unknown
Y54F10AM.8	Putative phospholipase B-like 2	Lysosome	Enzyme
Y54F10AR.1	Phosphatidylinositol transfer protein alpha isoform	Plasma Membrane	Transporter/Channel
Y57E12AL.1	Serine incorporator	ER	Enzyme
Y57G11C.33	Golgin subfamily A member 7	Golgi	Enzyme?
Y58A7A.1	High affinity copper uptake protein 1, SLC31A1	Endosome/Plasma Membrane	Transporter/Channel
Y63D3A.8	TLC domain-containing protein 1	Plasma Membrane	Signaling?
Y66A7A.7	worm specifc	Unknown	Unknown
Y71H2AM.13	carboxylesterase homolog	Cytosol/lipid droplet	Enzyme
Y71H2AM.2	Type 1 phosphatidylinositol 4,5-bisphosphate 4-phosphatase	Lysosome/others	Enzyme
Y73F4A.1	worm specifc	Unknown	Unknown
Y82E9BR.16	Solute carrier family 22 member 4: Sodium-ion dependent, low affinity carnitine transporter.	Plasma Membrane/Mitochondria	Transporter/Channel
Y92H12BR.3	worm specifc	Unknown	Unknown
ZC8.6	phosphatidylinositol 4-kinase type 2 alpha/beta	Autophagosome/Endosome	Signaling/Trafficking
ZIG-11	Isoform Long of Down syndrome cell adhesion molecule (Weak homology)	Secreted/Plasma Membrane	Signaling
ZIG-9	worm specifc	Unknown	Unknown
ZK1290.13	Wormspecifc	Unknown	Unknown
ZK6.11	worm specifc	Unknown	Unknown
ZK822.5	Sodium-coupled monocarboxylate transporter 2	Plasma Membrane	Transporter/Channel
ZMP-4	Zinc MetalloProtease	Basal membrane	Enzyme
AMAN-2	Alpha MANnosidase	Golgi apparatus	Enzyme
B0303.11	Solute carrier family 12 protein	Plasma Membrane	Transporter/Channel
C01G5.9	glycosyltransferase activity	Membrane	Enzyme
C05D12.3	EGF-like domain-containing protein	Unknown	Unknown
C06B8.7	SRCR domain-containing protein	Membrane	Unknown
C13B4.1	DOMON domain-containing protein	Membrane	Unknown
C18E9.5	Conserved domain protein	Membrane	Unknown
C25D7.10	TPT domain-containing protein	Membrane	Unknown
C29F3.7	CUB-like domain-containing protein	membrane raft	Unknown
C32F10.4	worm specifc	Membrane	Unknown
C40H1.7	Fungal lipase-like domain-containing protein	Unknown	Unknown
C52B9.4	Ortholog of human TMEM87B (transmembrane protein 87B, Predicted to be involved in retrograde transport, endosome to Golgi.	Membrane	Trafficking
C53B7.2	TIL domain-containing protein	extracellular region	Unknown
CLR-1	Receptor-type tyrosine-protein phosphatase	Cell membrane	Enzyme
COL-103	Nematode cuticle collagen N-terminal domain-containing protein	Unknown	Structure
COL-119	Nematode cuticle collagen N-terminal domain-containing protein	membrane	Structure
COL-8	Cuticle collagen 8	Unknown	Structure
D1054.11	Uterine Lumin Expressed/locailized	Unknown	Structure
DGN-1	Dystroglycan 1	membrane	Unknown
DHHC-8	DHHC-types zinc finger protein	Golgi apparatus and endoplasmic reticulum	Enzyme
DNJ-2	DNaJ domain (prokaryotic heat shock protein)	endoplasmic reticulum membrane	Signaling/Trafficking
DOD-19	GH131_N domain-containing protein	membrane raft	Signaling/Trafficking
ENT-6	Equilibrative Nucleoside Transporter	plasma membrane	Transporter/Channel
F07F6.8	Apolipoprotein L3-like	extracellular region	Transporter/Channel
F18H3.1	SPRY domain-containing protein 7	Unknown	Signaling/Trafficking
F23H12.10	Uncharacterized protein	Unknown	Unknown
F41C3.8	MARVEL domain-containing protein	membrane	Unknown
F43D2.6	Uncharacterized protein	membrane	Unknown
F52C6.2	Ubiquitin-like domain-containing protein	Unknown	Unknown
F54D5.9	F-box domain-containing protein	Unknown	Unknown
F56D5.6	Dentin sialophosphoprotein-like	Unknown	Unknown
F57G8.5	SLC (SoLute Carrier) homolog	membrane	Unknown
F59A3.4	Zrt (ZRT), Irt- (IRT-) like Protein Transporter	membrane	Transporter/Channel
F59F4.3	G_PROTEIN_RECEP_F1_2 domain-containing protein	membrane	Unknown
FRM-4	FERM domain (protein4.1-ezrin-radixin-moesin) family	cytoskeleton	Structure
FUT-1	FUcosyl Transferase	Golgi membrane	Enzyme
FUT-6	FUcosyl Transferase	Golgi cisterna membrane	Enzyme
GEM-4	Gon-2 Extragenic Modifier	plasma membrane	Signaling/Trafficking
GOLG-2	GOLGi associated coiled-coil protein homolog	Golgi cis cisterna; Golgi cisterna membrane; and cis-Golgi network	Sructure
GPA-12	G Protein, Alpha subunit	cytoplasm and nucleus	Signaling/Trafficking
GPB-2	G Protein, Beta subunit	neuronal cell body	Signaling/Trafficking
H20J04.6	Transmembrane protein 222	membrane	Transporter/Channel
HRG-4	Heme transporter hrg-4	plasma membrane	Transporter/Channel
HSP-43	Heat Shock Protein	nucleus and cytoplasm	Signaling/Trafficking
IFC-2	Intermediate Filament, C	Cytoplasm/desmosome	Structure
ILE-1	Intracellular LEctin	Intracellular membrane-bounded organelle	Signaling/Trafficking
INX-8	(INneXin)enable gap junction hemi-channel activity	Gap junction	Transporter/Channel
K04G2.9	MARVEL domain-containing protein	Plasma membrane	Structure
K05F1.5	LEukocyte cell-derived ChemoTaxin 2 (LECT-2) homolog	Basement membrane/cell surface/somatodendritic compartment	Signaling/Trafficking
K12C11.6	enable copper ion transmembrane transporter activity	Membrane	Transporter/Channel
M02D8.3	enable sodium:proton antiporter activity	Plasma membrane	Transporter/Channel
M03F8.5	CAP10 domain-containing protein	Membrane	Structure
MIG-22	abnormal cell MIGration	Golgi cisterna membrane	Enzyme
NEP-22	NEPrilysin metallopeptidase family	Membrane raft	Enzyme
OAC-32	O-ACyltransferase homolog	Membrane	Enzyme
PAQR-2	Progestin and AdipoQ Receptor family	Plasma membrane	Signaling
PGP-9	P-GlycoProtein related	Plasma membrane	Transporter/Channel
PKC-1	Protein Kinase C	Cytoplasm/Membrane	Enzyme
PMR-1	PMR-type Golgi ATPase	Golgi/Membrane	Signaling/Trafficking
R151.6	Is an ortholog of human DERL2 (derlin 2).	Endoplasmic reticulum membrane	Signaling
RAB-18	RAB family	Golgi	Enzyme
RAL-1	RAL (Ras-related GTPase) homolog	Plasma membrane	Enzyme
RHO-1	(RHO (small G protein) family	Membrane/Cytoplasm	Signaling/Trafficking
SET-24	SET (trithorax/polycomb) domain containing	Unknown	Structure
SFTD-3	SFT2 Domain containing protein 3 homolog	Membrane	Transporter/Channel
SPTL-2	Serine Palmitoyl Transferase family	Unknown	Enzyme
SQV-3	galactosyltransferase activity	Membrane	Enzyme
T03G11.6	MEthylTransferase Like	Unknown	Enzyme
T05C3.6	catalytic activity	Membrane	Signaling
T23G5.2	SEC14 like lipid binding 5	cytoplasm	Structure
TAG-120	glutamate ionotropic receptor NMDA type subunit associated protein 1	Golgi/endoplasmic/membrane	Signaling
TTC-7	TeTratriCopeptide repeat domain protein related	plasma membrane	Signaling/Trafficking
TTLL-5	Tubulin Tyrosine Ligase Like	cilium	Enzyme
TTR-32	TransThyretin-Related family domain	Cell surface and extracellular region	Structure
TTR-37	TransThyretin-Related family domain	Cell surface and extracellular region	Structure
UNC-50	Ortholog of human UNC50 (unc-50 inner nuclear membrane RNA binding protein)	Golgi membrane	Signaling
USO-1	USO1 (yeast transport protein) homolog)	ER to Golgi transport vesicle membrane	Transporter/Channel
VC5.2	Enriched in several structures	Unknown	Structure
W02D9.2	Yip1 domain family member 6	Trans-Golgi network	Trafficking
Y116A8C.33	worm specific	Unknown	Unknown
Y11D7A.3	UNC93-like protein MFSD11	Membrane	Structure
Y40H7A.4	Methyltransferase FkbM domain-containing protein	Membrane	Unknown
Y45G12B.2	metal ion binding activity	Golgi	Trafficking
Y54F10AL.1	Golgi calcium ion homeostasis and metal ion transport	Golgi	Transporter/Channel
Y55F3BL.2	Zrt (ZRT), Irt- (IRT-) like Protein Transporter	Plasma membrane	Transporter/Channel
Y60A3A.9	TransMEmbrane emp24 Domain-containing	Intracellular membrane-bounded organelle	Transporter/Channel
Y62H9A.3	worm specific	Unknown	Unknown
Y66D12A.24	worm specific	Membrane	Unknown
YIF-1	YIP1-Interacting Factor homolog	Intracellular membrane-bounded organelle	Transporter/Channel
ZK1073.1	Ortholog of human NDRG1 (N-myc downstream regulated 1); NDRG2 (NDRG family member 2); and NDRG4 (NDRG family member 4)	cytoplasm	Signaling
ZK813.1	worm specific	Unknown	Unknown
ZK858.6	Transmembrane 9 superfamily member	Membrane	Signaling/Trafficking
ZK896.1	worm specific	Unknown	Unknown
ZMP-3	Zinc MetalloProtease	Extracellular matrix	Enzyme
