# Supplementary material for: Organelle proteomic profiling reveals lysosomal heterogeneity in association with longevity
Source: eLife. 2024 Jan 19;13:e85214. doi: 10.7554/eLife.85214 (PMC10876212; doi:10.7554/eLife.85214)
Supplement: Supplementary file 11. [file elife-85214-supp11.xlsx]

## Sheet: WT
ID	Sample Information	Mass Spectrum File Name
34853	HA-LMP-1_FT-1	34853_1_MSPCL_lysate_1ug.raw
34926	HA-LMP-1_FT-2	34926_1_MSPCL_lysosome_HA_IP_beads_FT_1ug.raw
35093	HA-LMP-1_FT-3	35093_1_MSPCL_lysosome_HA-Lmp1_IP-FT_1ug.raw
35555	HA-LMP-1_FT-4	35555_1_MSPCL_1ug_HA-Lmp1_FT_Repeat4.raw
34465	HA-LMP-1_IP-1	34465_1_MSPCL_lysosome_Lamp1_Strap_1ug
34925	HA-LMP-1_IP-2	34925_1_MSPCL_lysosome_HA_IP_beads_1ug
35092	HA-LMP-1_IP-3	35092_1_MSPCL_lysosome_HA-Lmp1_IP_1ug.raw
35554	HA-LMP-1_IP-4	35554_1_MSPCL_1ug_HA-Lmp1_IP_Repeat4.raw
35565	HA-CTNS-1_FT-1	35565_1_MSPCL_1ug_HACtns1_FT_repeat1
35567	HA-CTNS-1_FT-2	35567_1_MSPCL_1ug_HACtns1_FT_Repeat2
36104	HA-CTNS-1_FT-3	36104_1_MSPCL_lysosome_HA-Ctns1_IP-FT_rep3.raw
35564	HA-CTNS-1_IP-1	35564_1_MSPCL_1ug_HACtns1_IP_repeat1
35566	HA-CTNS-1_IP-2	35566_1_MSPCL_1ug_HACtns1_IP_repeat2
36103	HA-CTNS-1_IP-3	36103_1_MSPCL_lysosome_HA-Ctns1_IP_rep3.raw
34852	WT no tag IP-1	34852_1_MSPCL_bead_1ug.raw
35552	WT no tag IP-2	35552_1_MSPCL_1ug_WT_1
36100	WT no tag IP-3	36100_1_MSPCL_lysosome_WT_no-tag_rep3.raw
35557	25C-HA-Lamp FT-1	35557_1_MCPSL_1ug_HA-Lmp1_FT_Repeat5.raw
36124	25C-HA-Lamp FT-2	36124_1_MSPCL_lysosome_25C-HA-Lamp1_IP-FT_rep2.raw
36126	25C-HA-Lamp FT-3	36126_1_MSPCL_lysosome_25C-HA-Lamp1_IP-FT_rep3.raw
35556	25C-HA-Lamp IP-1	35556_1_MSPCL_1ug_HA-Lmp1_IP_Repeat5.raw
36123	25C-HA-Lamp IP-2	36123_1_MSPCL_lysosome_25C-HA-Lamp1_IP_rep2.raw
36125	25C-HA-Lamp IP-3	36125_1_MSPCL_lysosome_25C-HA-Lamp1_IP_rep3.raw

## Sheet: Long lived
ID	Sample Information	Mass Spectrum File Name
36114	MW42_HA-LMP-1_FT-1	36114_1_MSPCL_lysosome_MW42-HA-Lamp1_IP-FT_rep1.raw
36116	MW42_HA-LMP-1_FT-2	36116_1_MSPCL_lysosome_MW42-HA-Lamp1_IP-FT_rep2.raw
38478	MW42_HA-LMP-1_FT-3	38478_1_MSPCL_lysosome_MW42-Lmp1_IP_FT.raw
36113	MW42_HA-LMP-1_IP-1	36113_1_MSPCL_lysosome_MW42-HA-Lamp1_IP_rep1.raw
36115	MW42_HA-LMP-1_IP-2	36115_1_MSPCL_lysosome_MW42-HA-Lamp1_IP_rep2.raw
38477	MW42_HA-LMP-1_IP-3	38477_1_MSPCL_lysosome_MW42-Lmp1_IP.raw
35561	daf-2_HA-LMP-1_FT-1	35561_1_MSPCL_1ug_daf2_HA-Lmp1_FT_Repeat1.raw
35563	daf-2_HA-LMP-1_FT-2	35563_1_MSPCL_1ug_daf2_HA-Lmp1_FT_Repeat2.raw
36106	daf-2_HA-LMP-1_FT-3	36106_1_MSPCL_lysosome_Daf2-HA-Lamp1_IP-FT_rep3.raw
35560	daf-2_HA-LMP-1_IP-1	35560_1_MSPCL_1ug_daf2_HA-Lmp1_IP_Repeat1.raw
35562	daf-2_HA-LMP-1_IP-2	35562_1_MSPCL_1ug_daf2_HA-Lmp1_IP_Repeat2.raw
36105	daf-2_HA-LMP-1_IP-3	36105_1_MSPCL_lysosome_Daf2-HA-Lamp1_IP_rep3.raw
35559	25C-glp-1_HA-LMP-1_FT-1	35559_1_MSPCL_1ug_glp1_HA-Lmp1_FT_Repeat1.raw
36120	25C-glp-1_HA-LMP-1_FT-2	36120_1_MSPCL_lysosome_Glp1-HA-Lamp1_IP-FT_rep2.raw
36122	25C-glp-1_HA-LMP-1_FT-3	36122_1_MSPCL_lysosome_Glp1-HA-Lamp1_IP-FT_rep3.raw
35558	25C-glp-1_HA-LMP-1_IP-1	35558_1_MSPCL_1ug_glp1_HA-Lmp1_IP_Repeat1.raw
36119	25C-glp-1_HA-LMP-1_IP-2	36119_1_MSPCL_lysosome_Glp1-HA-Lamp1_IP_rep2.raw
36121	25C-glp-1_HA-LMP-1_IP-3	36121_1_MSPCL_lysosome_Glp1-HA-Lamp1_IP_rep3.raw
36108	isp-1_HA-LMP-1_FT-1	36108_1_MSPCL_lysosome_Isp1-HA-Lamp1_IP-FT_rep1.raw
36110	isp-1_HA-LMP-1_FT-2	36110_3_MSPCL_lysosome_Isp1-HA-Lamp1_IP-FT_rep2.raw
36112	isp-1_HA-LMP-1_FT-3	36112_2_MSPCL_lysosome_Isp1-HA-Lamp1_IP-FT_rep3.raw
36107	isp-1_HA-LMP-1_IP-1	36107_1_MSPCL_lysosome_Isp1-HA-Lamp1_IP_rep1.raw
36109	isp-1_HA-LMP-1_IP-2	36109_1_MSPCL_lysosome_Isp1-HA-Lamp1_IP_rep2.raw
36111	isp-1_HA-LMP-1_IP-3	36111_1_MSPCL_lysosome_Isp1-HA-Lamp1_IP_rep3.raw

## Sheet: Tissue Specific
ID	Sample Information	Mass Spectrum File Name
37435	Pges-LMP-1-FT-1	37435_1_MSPCL_lysosome_Pges-Lmp1_IP-FT_rep1_1ug.raw
37437	Pges-LMP-1-FT-2	37437_1_MSPCL_lysosome_Pges-Lmp1_IP-FT_rep2_1ug.raw
38486	Pges-LMP-1-FT-3	38486_1_MSPCL_lysosome_Pges-Lmp1_IP_FT.raw
37434	Pges-LMP-1-IP-1	37434_1_MSPCL_lysosome_Pges-Lmp1_IP_rep1_1ug.raw
37436	Pges-LMP-1-IP-2	37436_1_MSPCL_lysosome_Pges-Lmp1_IP_rep2_1ug.raw
38485	Pges-LMP-1-IP-3	38485_1_MSPCL_lysosome_Pges-Lmp1_IP.raw
37439	Pmyo-LMP-1-FT-1	37439_1_MSPCL_lysosome_Pmyo-Lmp1_IP-FT_rep1_1ug.raw
38488	Pmyo-LMP-1-FT-2	38488_1_MSPCL_lysosome_Pmyo-Lmp1_IP_FT.raw
38490	Pmyo-LMP-1-FT-3	38490_1_MSPCL_lysosome_Pmyo-Lmp1_IP_FT.raw
37438	Pmyo-LMP-1-IP-1	37438_1_MSPCL_lysosome_Pmyo-Lmp1_IP_rep1_1ug.raw
38487	Pmyo-LMP-1-IP-2	38487_1_MSPCL_lysosome_Pmyo-Lmp1_IP.raw
38489	Pmyo-LMP-1-IP-3	38489_1_MSPCL_lysosome_Pmyo-Lmp1_IP.raw
37441	Pcol-LMP-1-FT-1	37441_1_MSPCL_lysosome_Pcol-Lmp1_IP-FT_rep1_1ug.raw
38492	Pcol-LMP-1-FT-2	38492_1_MSPCL_lysosome_Pcol-Lmp1_IP_FT.raw
38494	Pcol-LMP-1-FT-3	38494_1_MSPCL_lysosome_Pcol-Lmp1_IP_FT.raw
37440	Pcol-LMP-1-IP-1	37440_1_MSPCL_lysosome_Pcol-Lmp1_IP_rep1_1ug.raw
38491	Pcol-LMP-1-IP-2	38491_1_MSPCL_lysosome_Pcol-Lmp1_IP.raw
38493	Pcol-LMP-1-IP-3	38493_1_MSPCL_lysosome_Pcol-Lmp1_IP.raw
37431	Punc-LMP-1-FT-1	37431_1_MSPCL_lysosome_Punc-Lmp1_IP-FT_rep1_1ug.raw
37433	Punc-LMP-1-FT-2	37433_1_MSPCL_lysosome_Punc-Lmp1_IP-FT_rep2_1ug.raw
38496	Punc-LMP-1-FT-3	38496_1_MSPCL_lysosome_Punc-Lmp1_IP_FT.raw
37430	Punc-LMP-1-IP-1	37430_1_MSPCL_lysosome_Punc-Lmp1_IP_rep1_1ug.raw
37432	Punc-LMP-1-IP-2	37432_1_MSPCL_lysosome_Punc-Lmp1_IP_rep2_1ug.raw
38495	Punc-LMP-1-IP-3	38495_1_MSPCL_lysosome_Punc-Lmp1_IP.raw
