# Supplementary figures and images for: Organelle proteomic profiling reveals lysosomal heterogeneity in association with longevity
Source: eLife journal article supplement (doi:10.7554/elife.85214), 2024-01-19

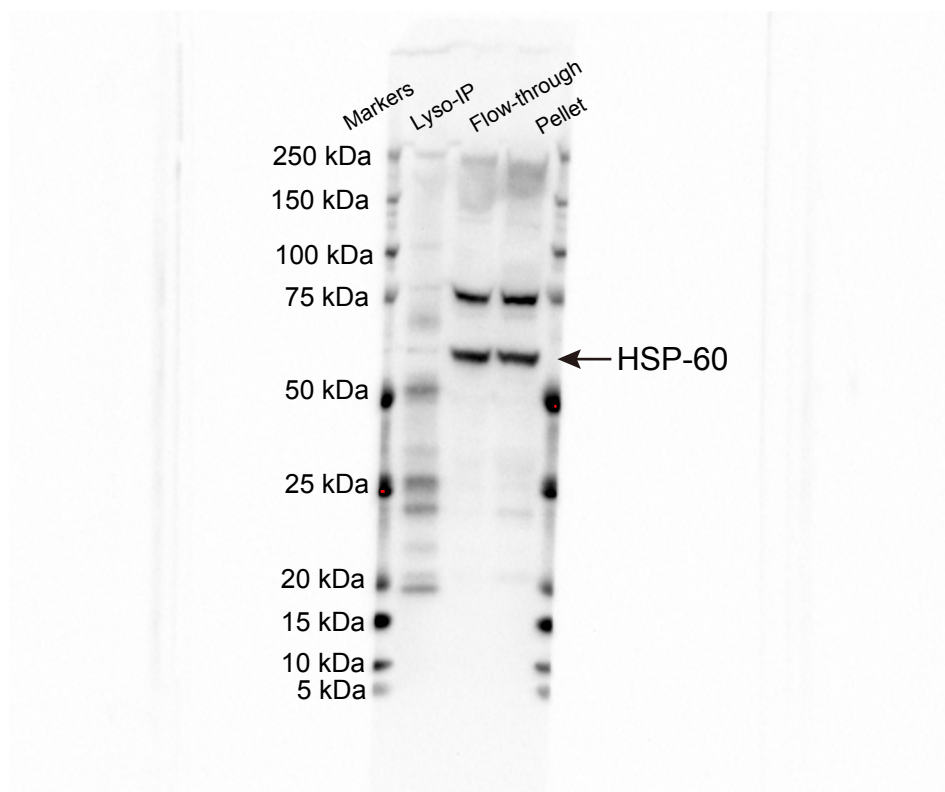

Supplement: fig1-data1 [file elife-85214-fig1-data1-v2.zip]

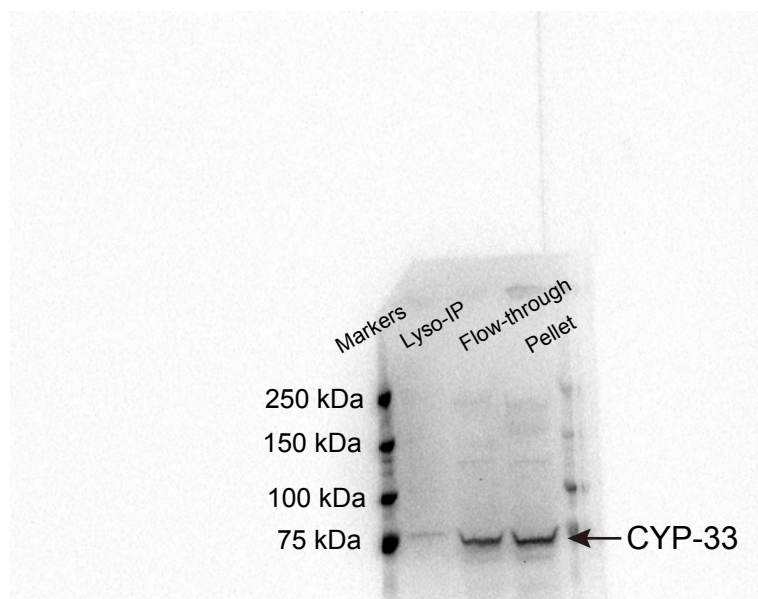

Supplement: fig1-data1 [file elife-85214-fig1-data1-v2.zip]

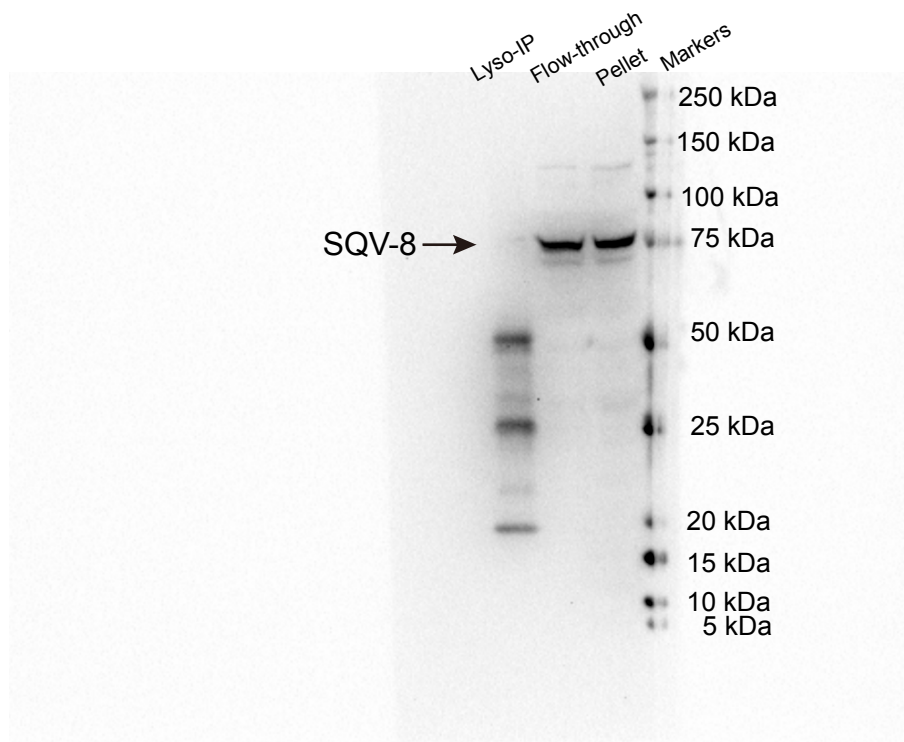

Supplement: fig1-data1 [file elife-85214-fig1-data1-v2.zip]

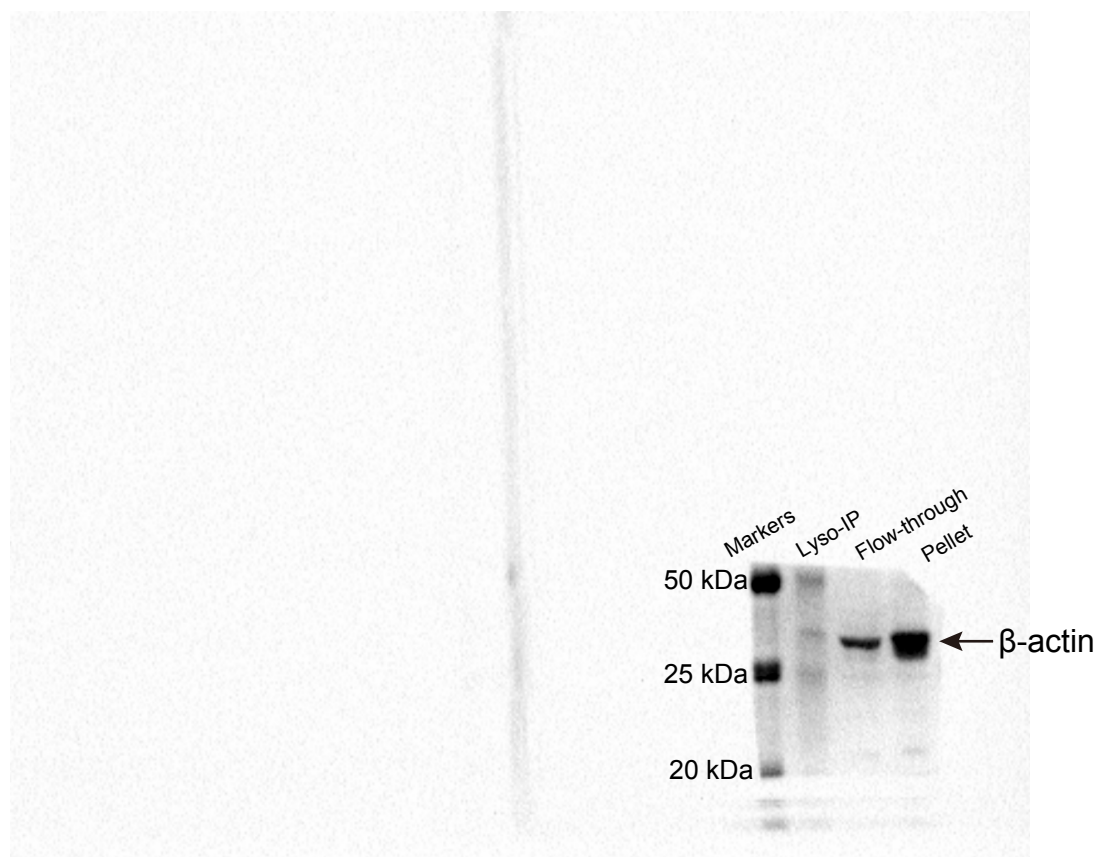

Supplement: fig1-data1 [file elife-85214-fig1-data1-v2.zip]

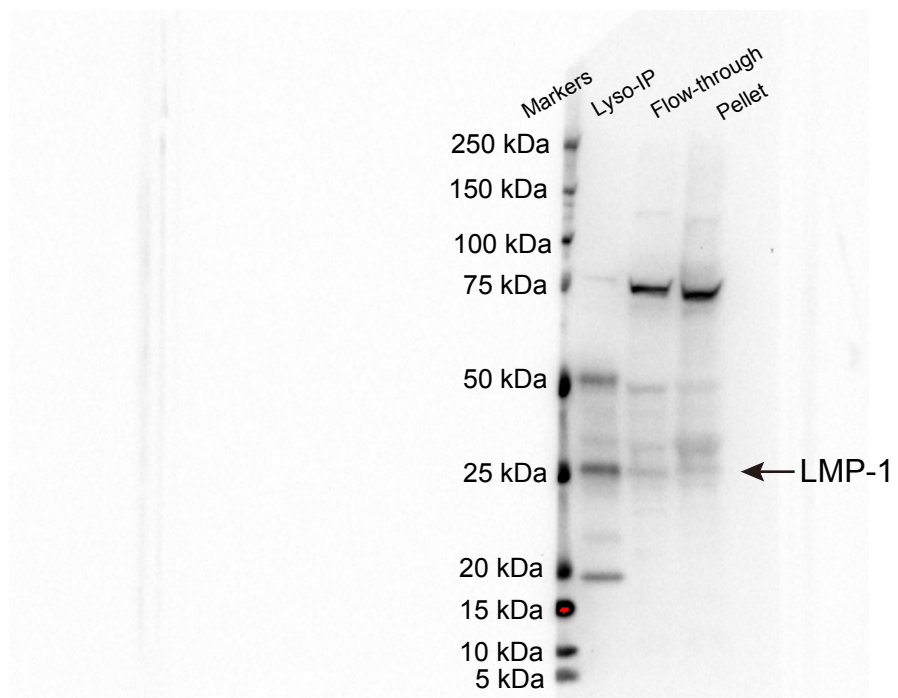

Supplement: fig1-data1 [file elife-85214-fig1-data1-v2.zip]

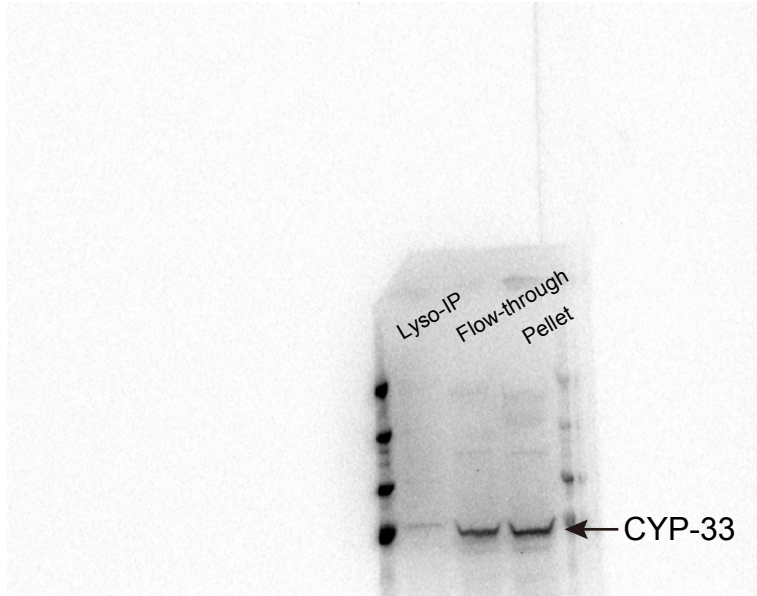

Supplement: supp [file CYP-33_labelled.pdf › Western blot pictures in Fig 1/CYP-33_labelled.pdf]

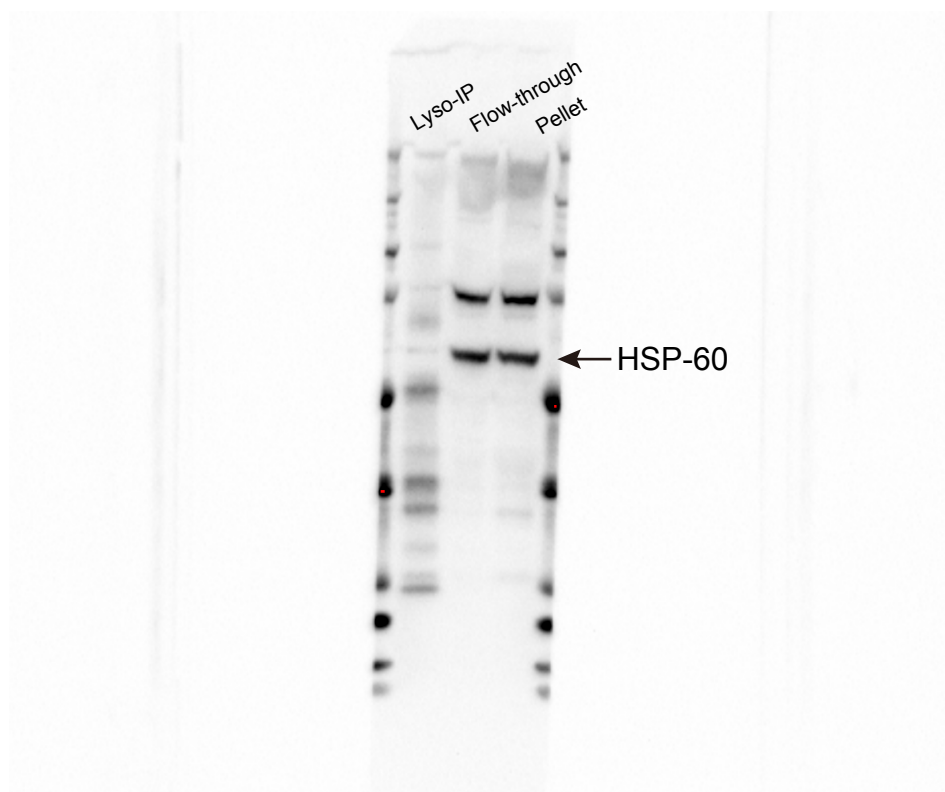

Supplement: supp [file HSP-60_labelled.pdf › Western blot pictures in Fig 1/HSP-60_labelled.pdf]

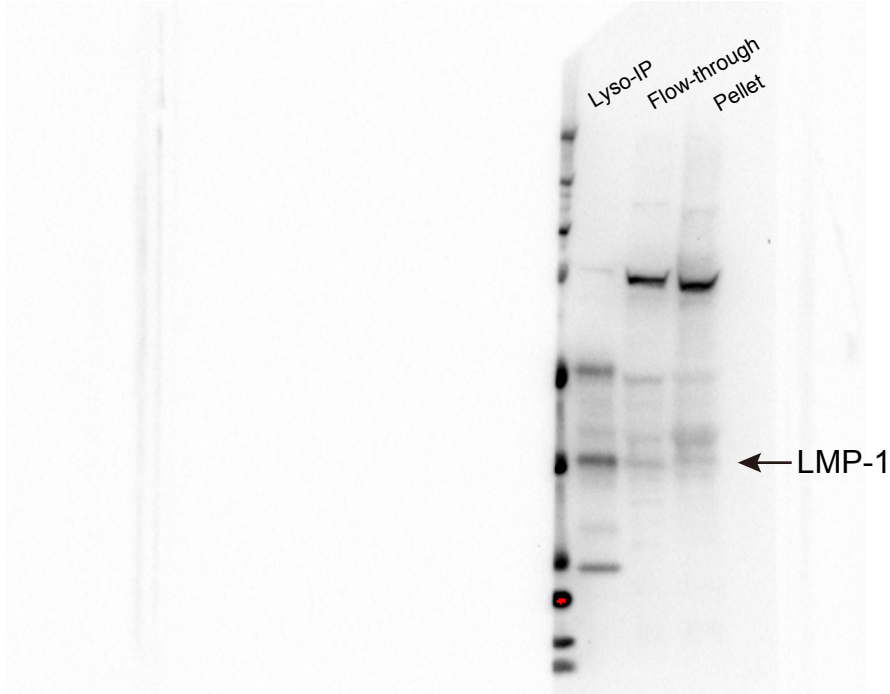

Supplement: supp [file LMP-1_labelled.pdf › Western blot pictures in Fig 1/LMP-1_labelled.pdf]

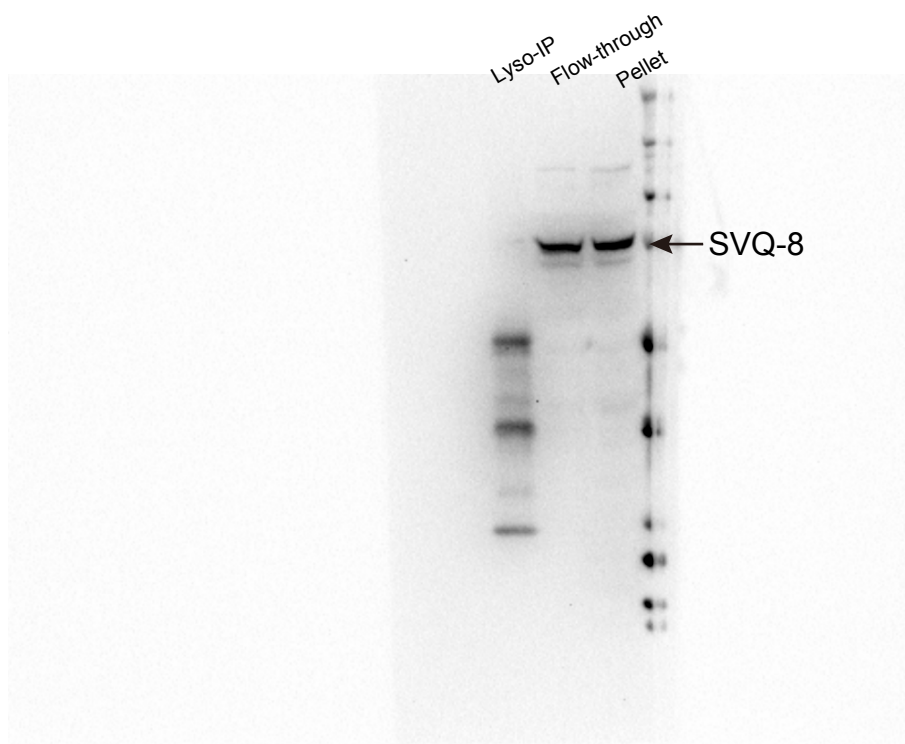

Supplement: supp [file SVQ-8_labelled.pdf › Western blot pictures in Fig 1/SVQ-8_labelled.pdf]

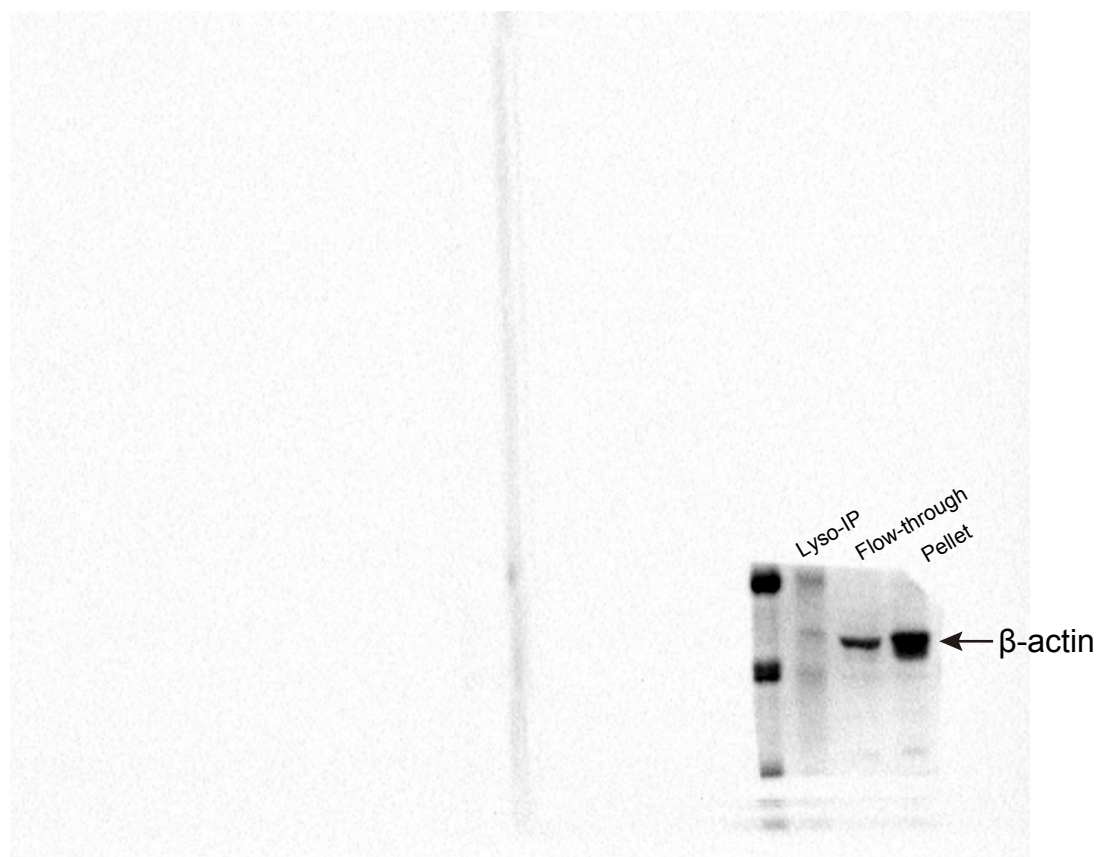

Supplement: supp [file β-actin_labelled.pdf › Western blot pictures in Fig 1/β-actin_labelled.pdf]

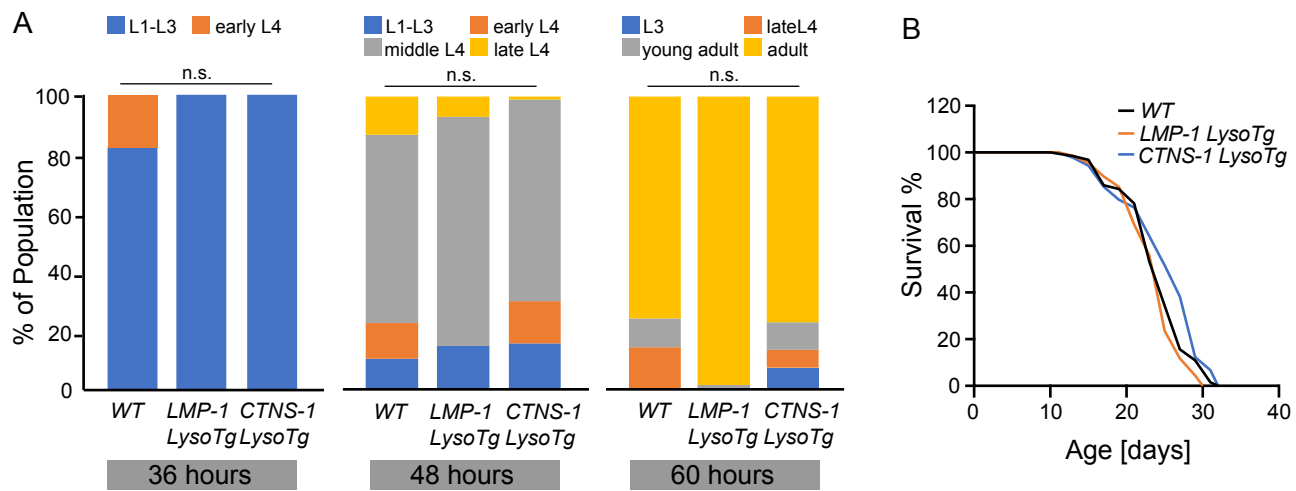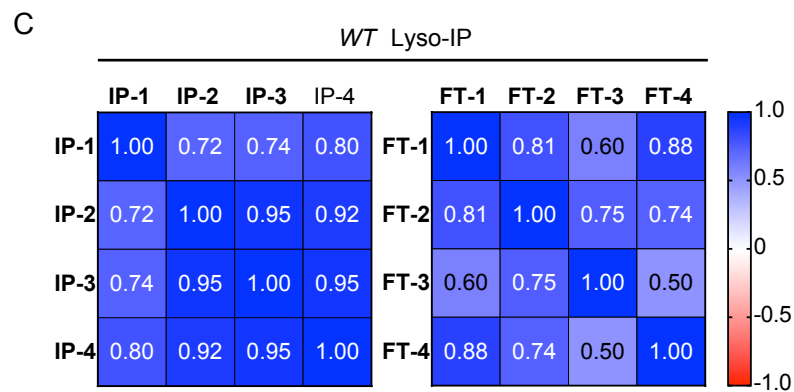

Supplement: supp [file elife_poa_e85214_Figure_1_figure_supplement_1.pdf › elife_poa_e85214_Figure_1_figure_supplement_1.pdf]

■ Homolog  
■ Non-homolog

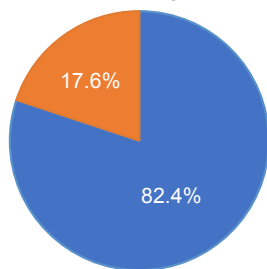

Supplement: supp [file elife_poa_e85214_Figure_2_figure_supplement_1.pdf › elife_poa_e85214_Figure_2_figure_supplement_1.pdf]

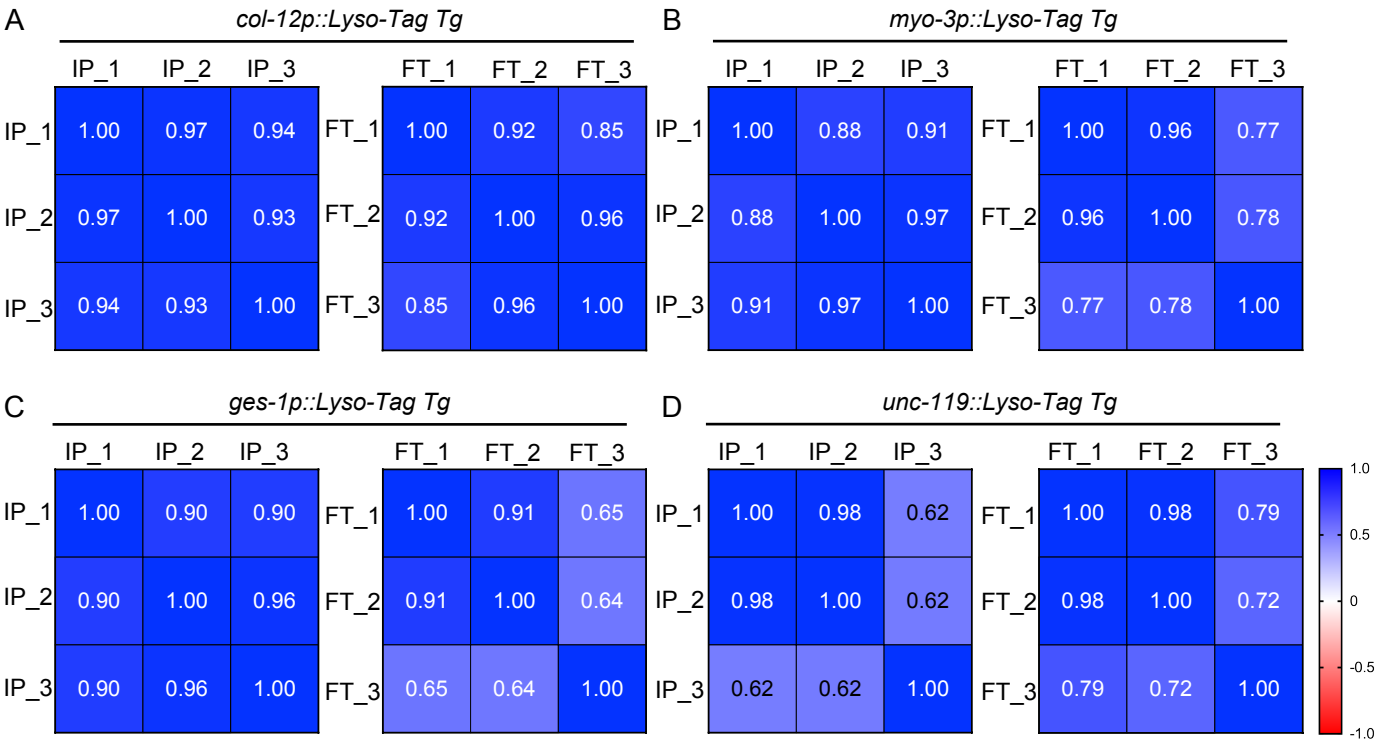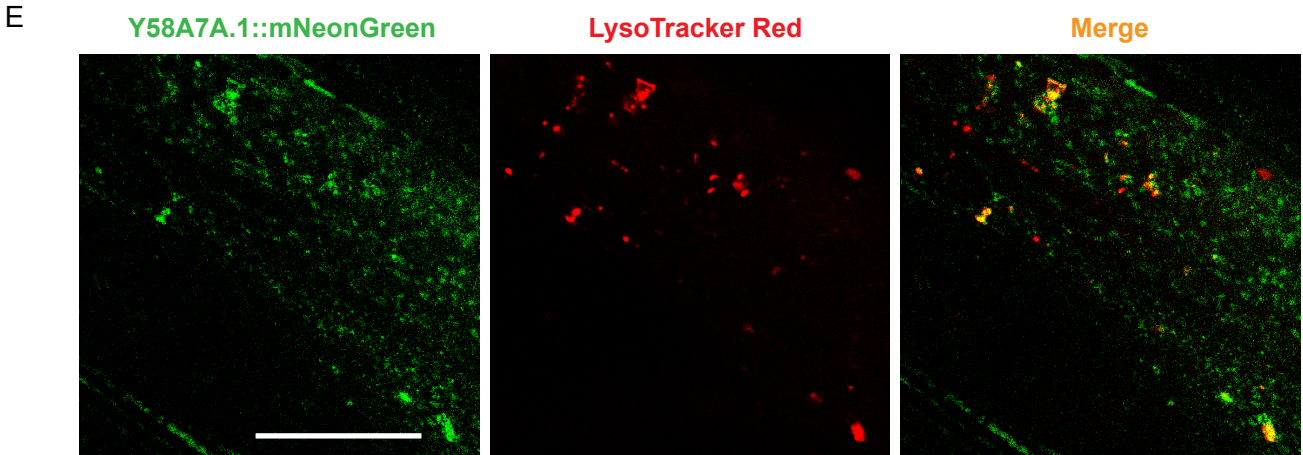

Supplement: supp [file elife_poa_e85214_Figure_3_figure_supplement_1.pdf › elife_poa_e85214_Figure_3_figure_supplement_1.pdf]

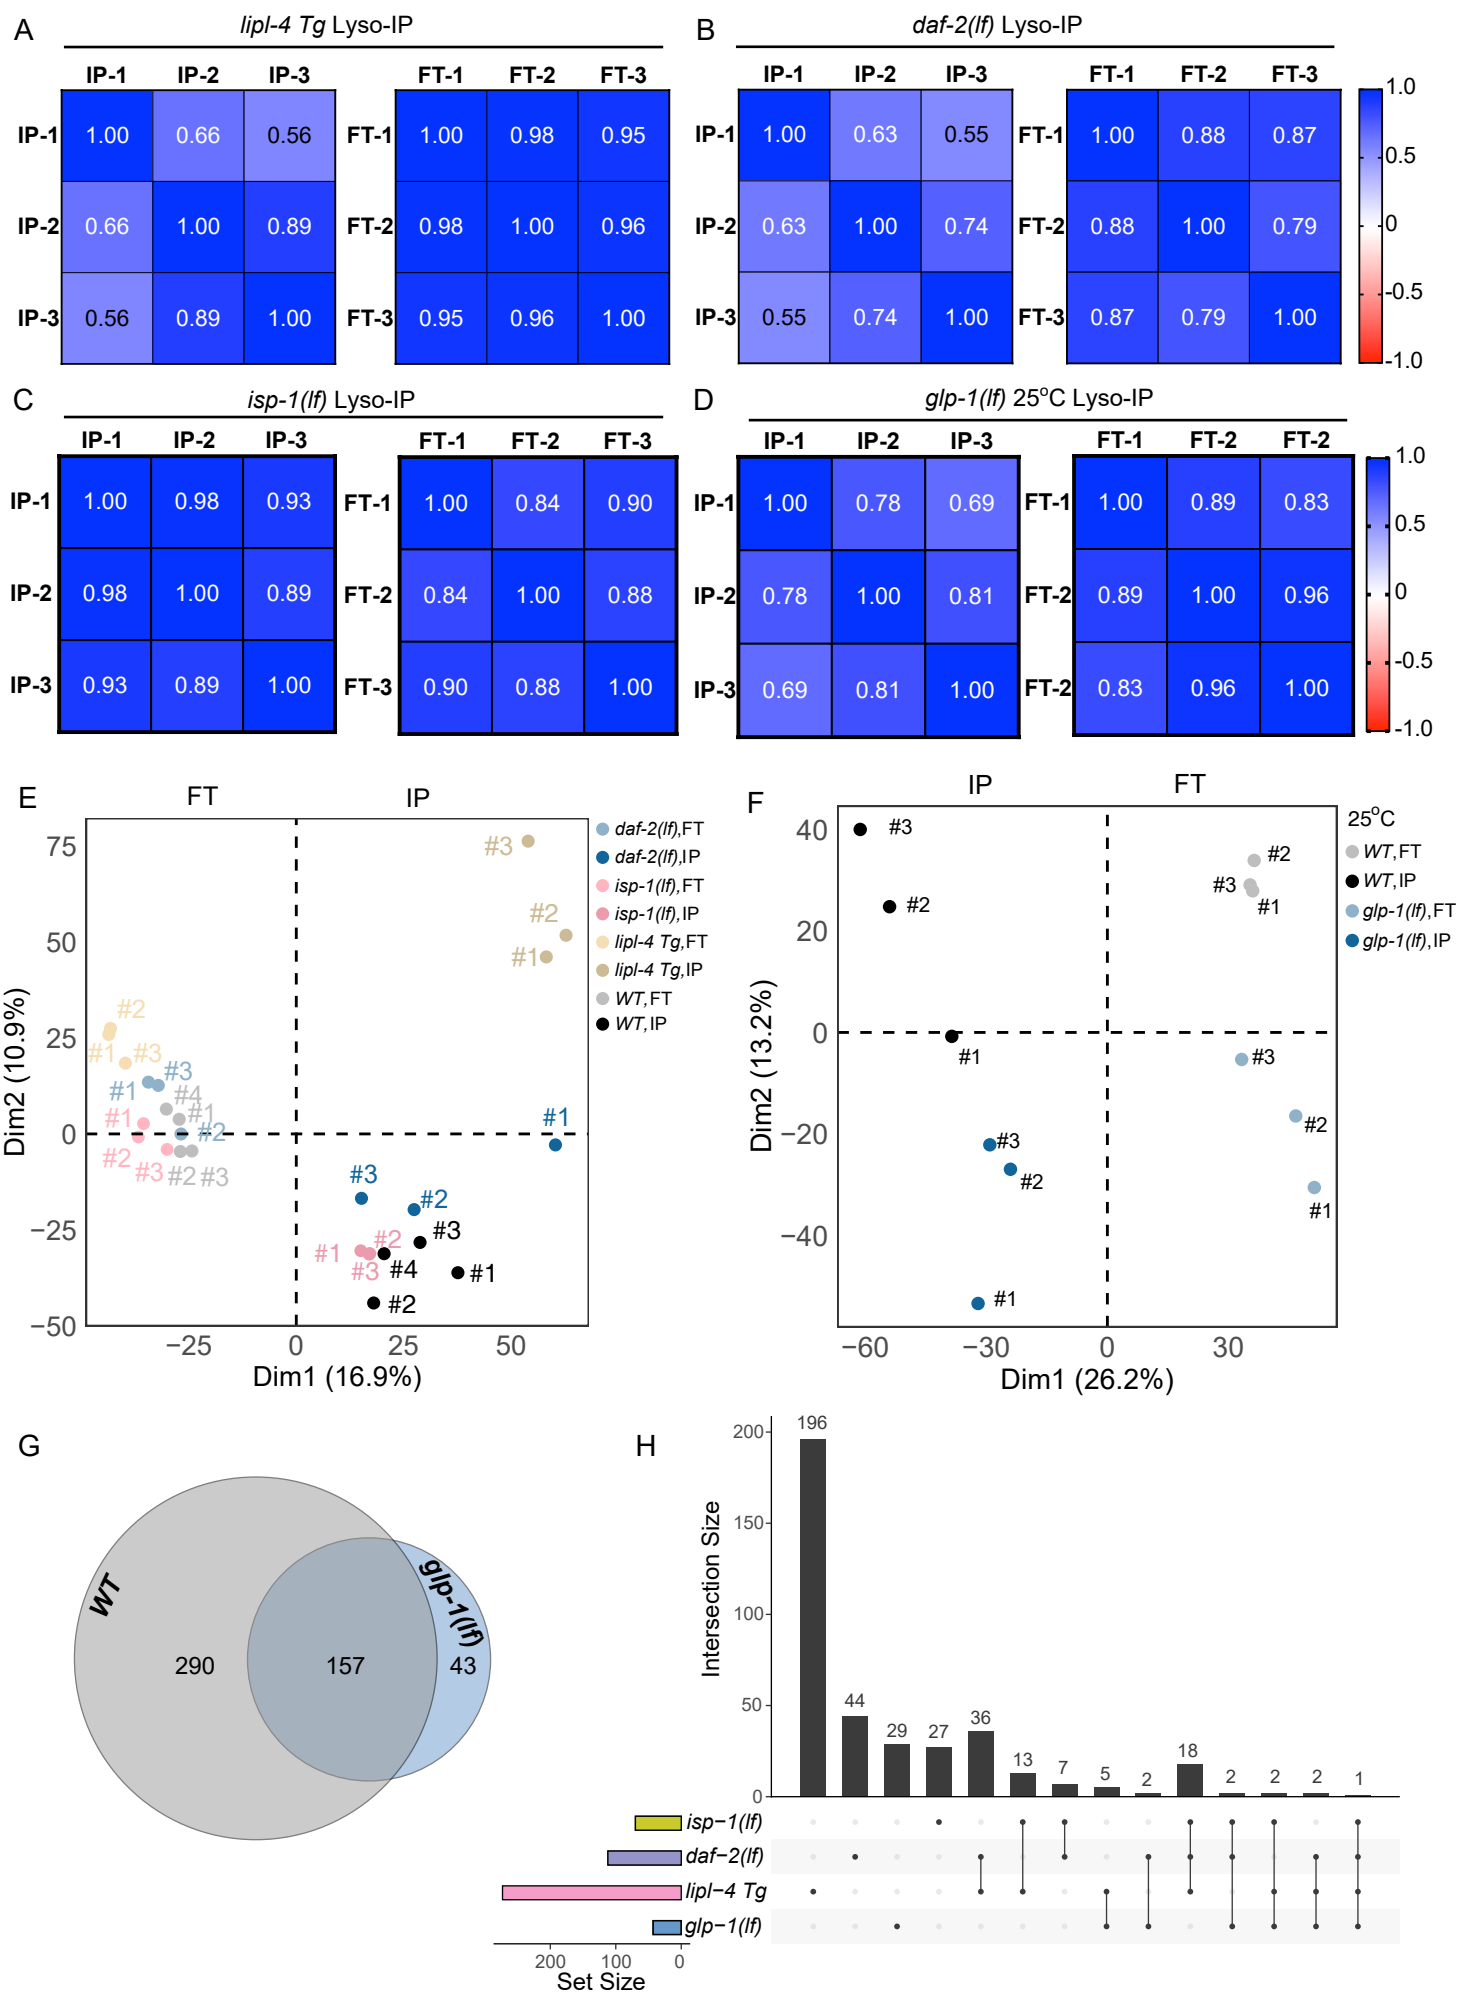

Supplement: supp [file elife_poa_e85214_Figure_4_figure_supplement_1.pdf › elife_poa_e85214_Figure_4_figure_supplement_1.pdf]

A Outline nuclear membrane → Outline plasma membrane → Regions divided

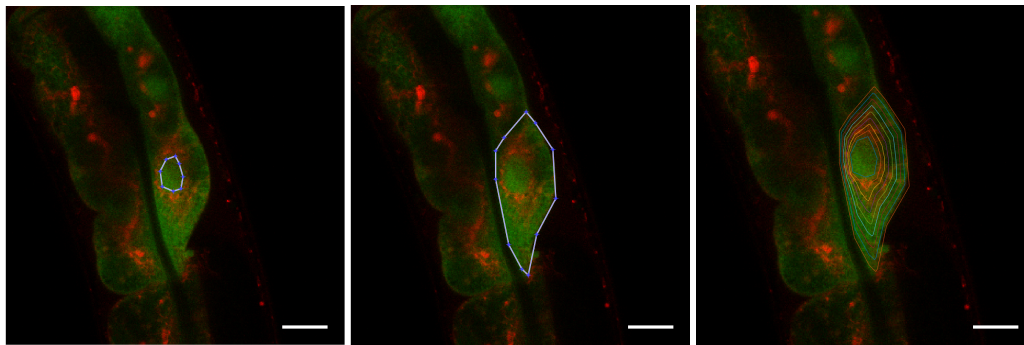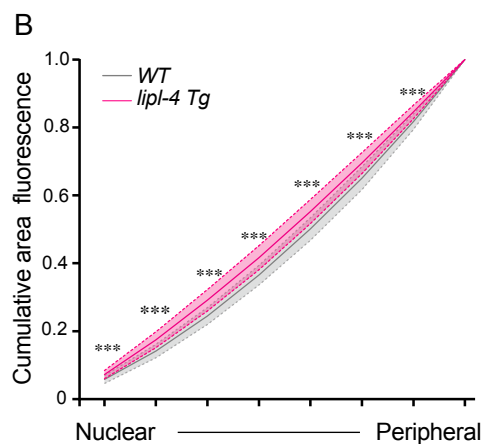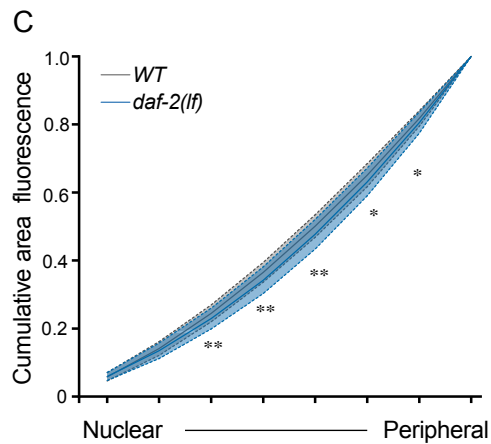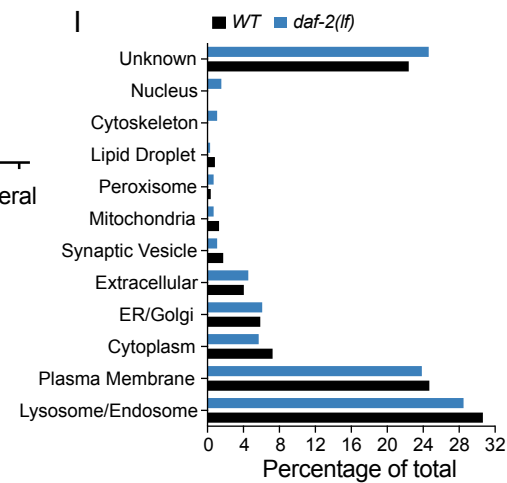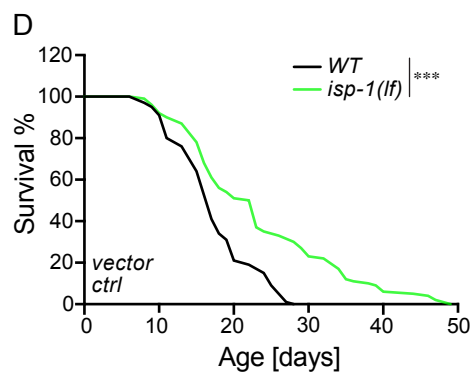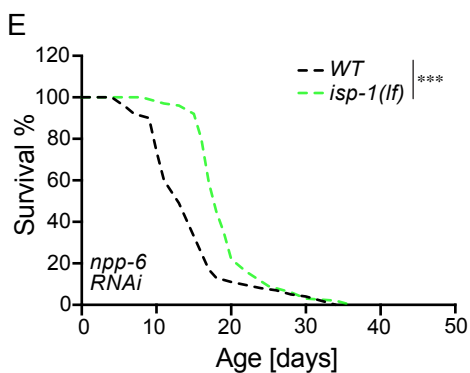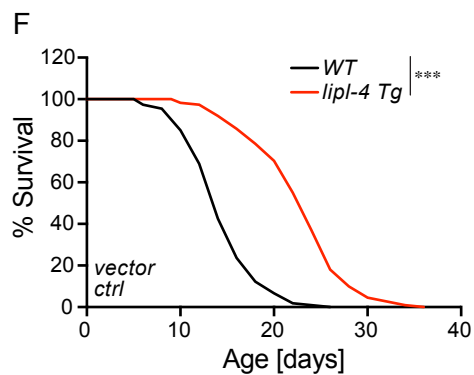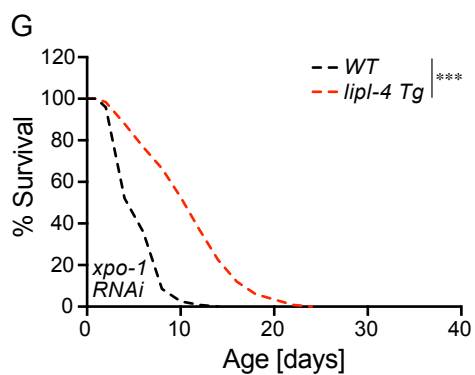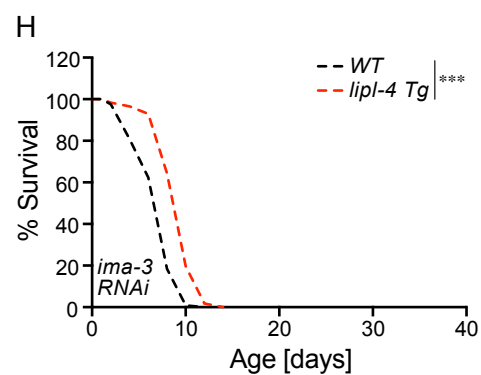

Supplement: supp [file elife_poa_e85214_Figure_6_figure_supplement_1.pdf › elife_poa_e85214_Figure_6_figure_supplement_1.pdf]

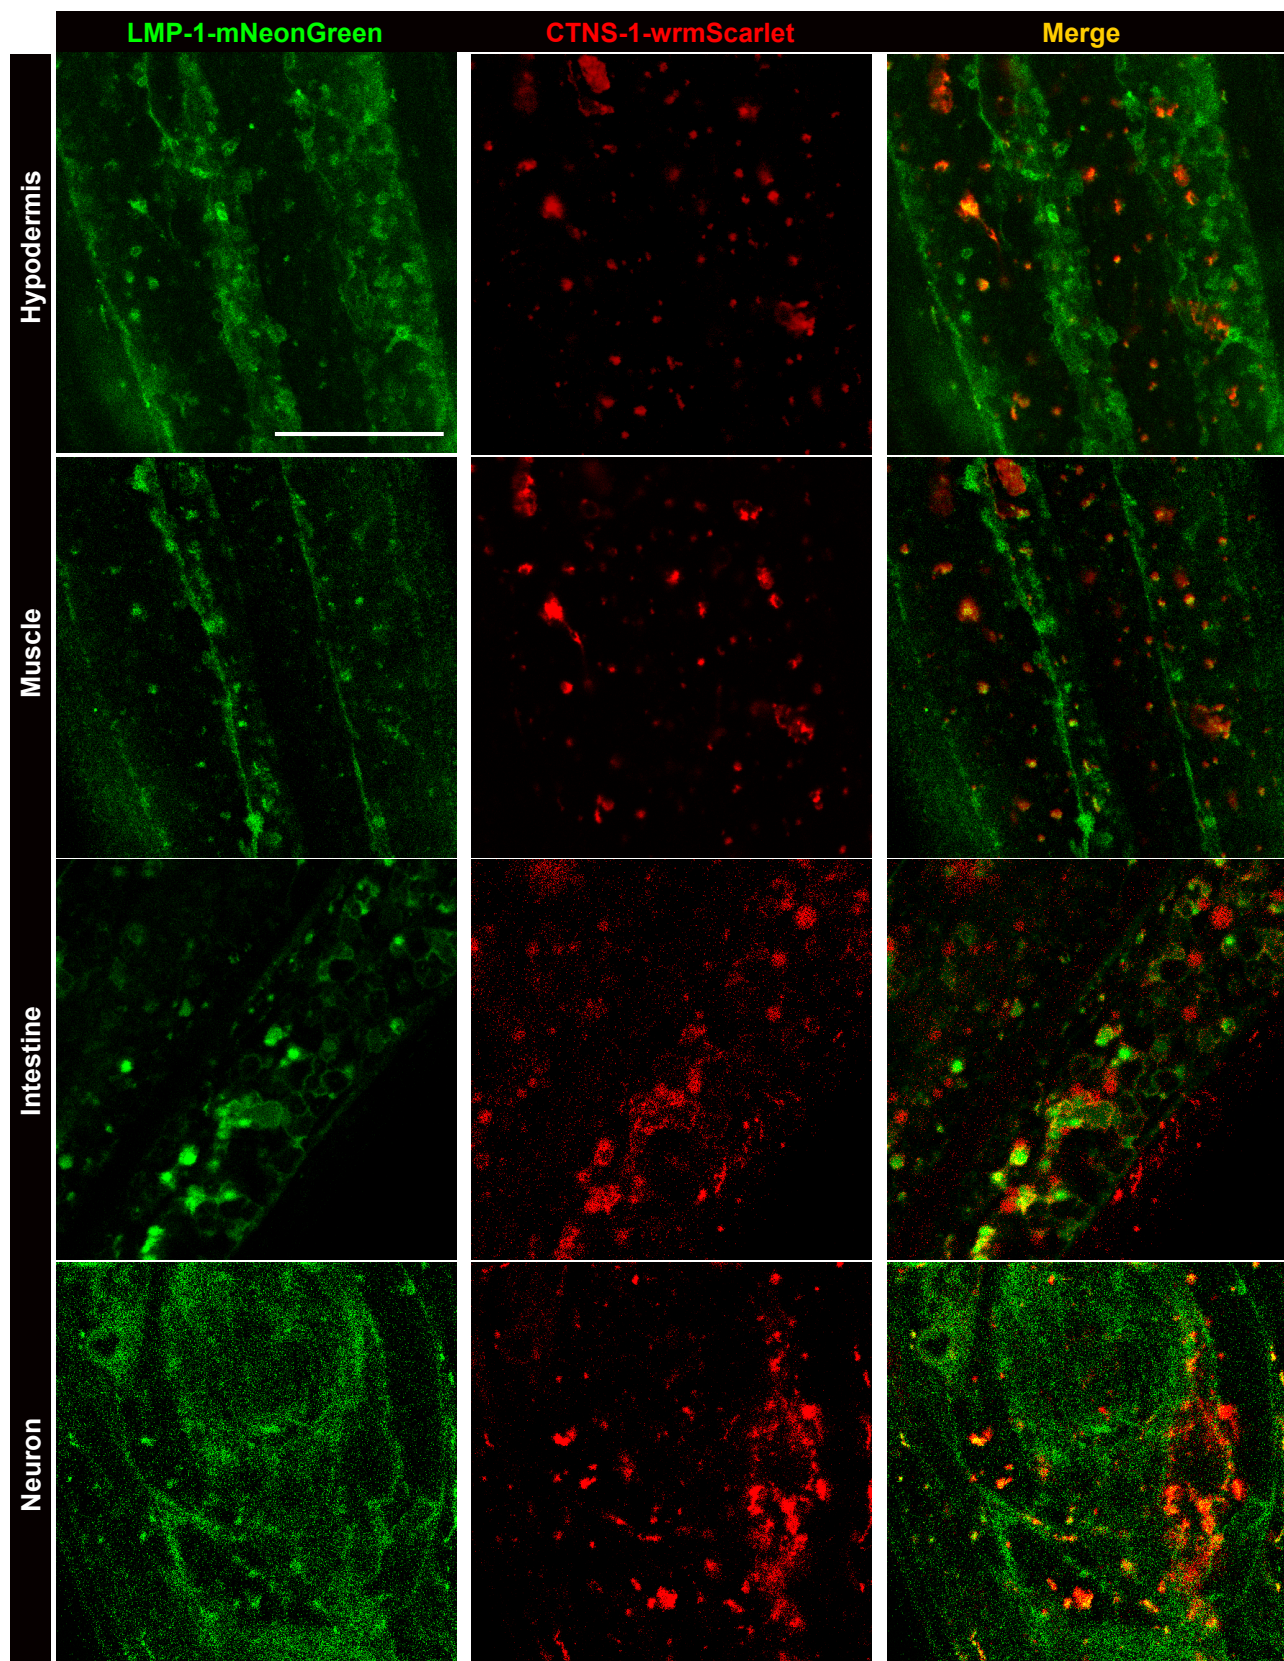

Supplement: supp [file elife_poa_e85214_Figure_7_figure_supplement_1.pdf › elife_poa_e85214_Figure_7_figure_supplement_1.pdf]

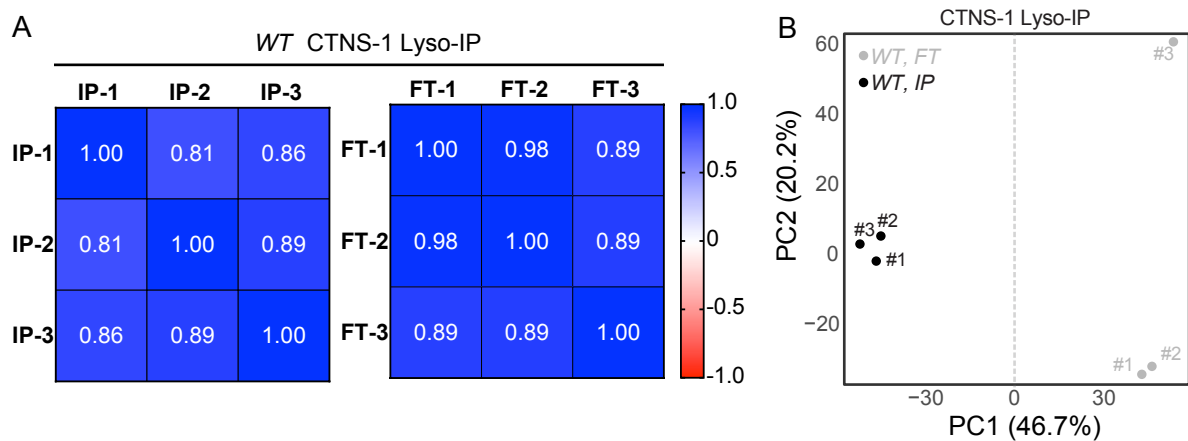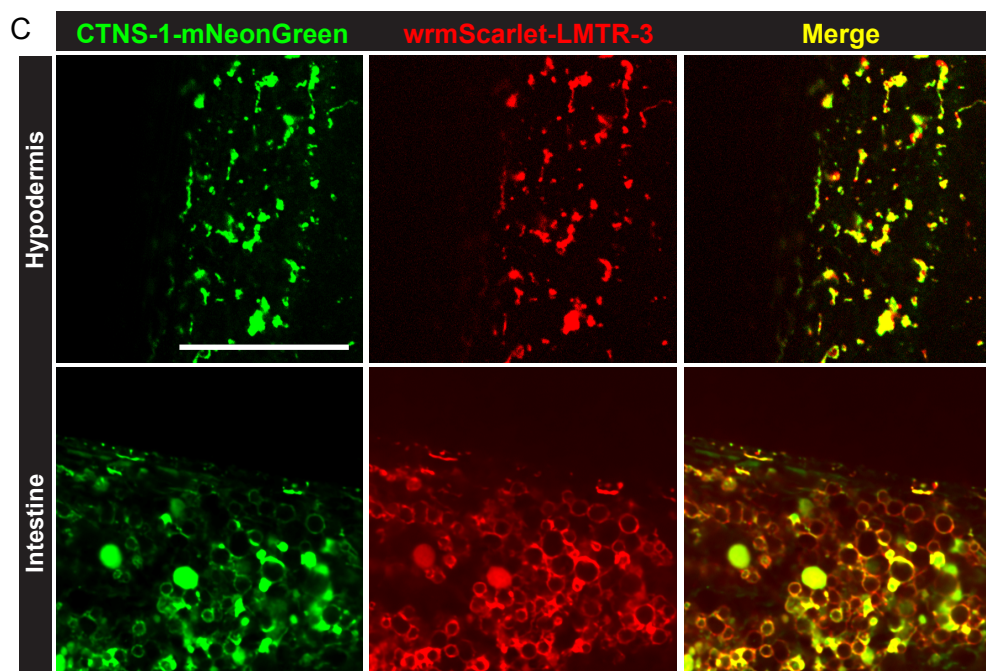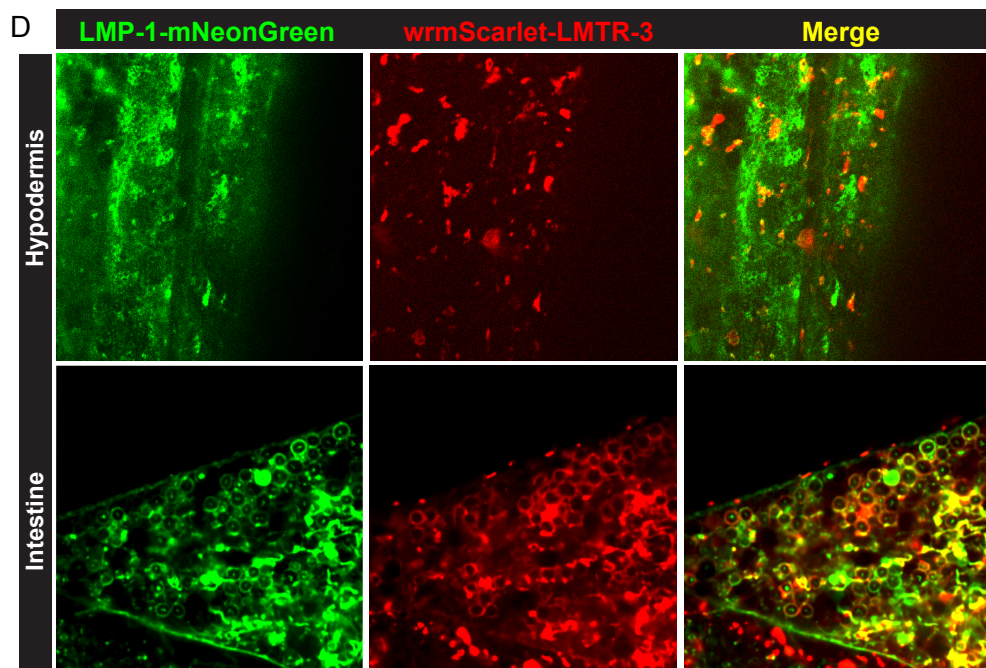

Supplement: supp [file elife_poa_e85214_Figure_7_figure_supplement_2.pdf › elife_poa_e85214_Figure_7_figure_supplement_2.pdf]

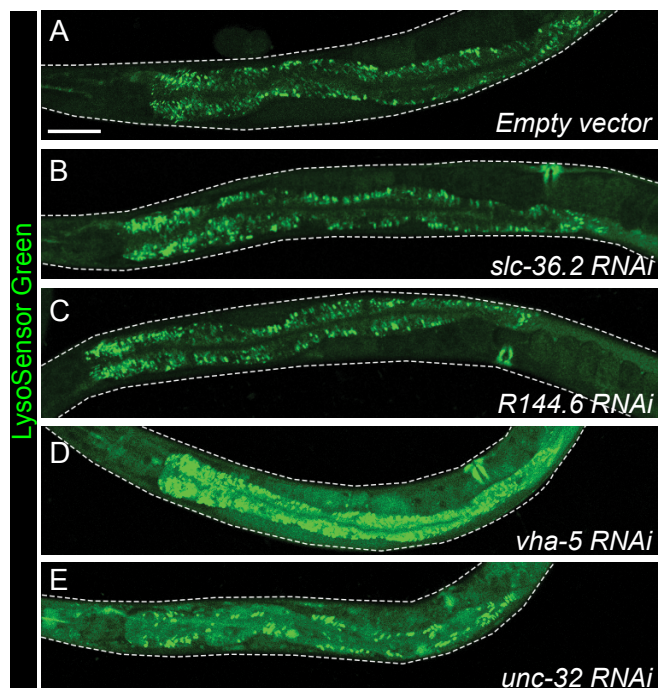

F

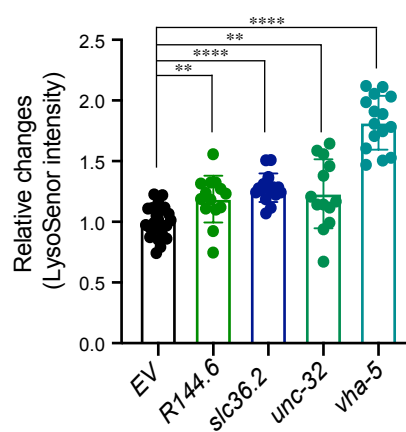

Supplement: supp [file elife_poa_e85214_Figure_8_figure_supplement_1.pdf › elife_poa_e85214_Figure_8_figure_supplement_1.pdf]
